# Supplementary material for: Seroconversion stages COVID19 into distinct pathophysiological states
Source: medRxiv preprint, doi:10.1101/2020.12.05.20244442, version 1 (2020-12-07)
Supplement: Supplementary File S3 [file 244442_file05.xlsx]

## Sheet: Spearman corr
Aptamer_name	Target	SwissProtID	Gene_symbol	rho	pval	BH_padj
SFTPD.19590.46	SP-D	P35247	SFTPD	0.551114	9.24137e-07	0.000372966
TNFRSF17.2665.26	BCMA	Q02223	TNFRSF17	0.532408	2.49423e-06	0.000707326
SERPINA3.4153.11	alpha-1-antichymotrypsin complex	P01011	SERPINA3	0.504311	9.95507e-06	0.00149046
CRISPLD2.5691.2	CRLD2	Q9H0B8	CRISPLD2	0.502375	1.09028e-05	0.00150864
CCL14.2900.53	HCC-1	Q16627	CCL14	0.488564	2.05292e-05	0.00248557
WNT5A.13268.45	WNT5A	P41221	WNT5A	0.486737	2.22763e-05	0.00250894
PCDHGA12.6938.21	PCDGC	O60330	PCDHGA12	0.456193	8.16585e-05	0.00627733
CDH11.16305.10	Cadherin-11	P55287	CDH11	0.443953	0.000132888	0.00903225
MMP9.2579.17	MMP-9	P14780	MMP9	0.443332	0.000136146	0.00903225
ALPL.16926.44	Alkaline phosphatase, liver	P05186	ALPL	0.437304	0.000171816	0.0105625
FAIM3.6574.11	FAIM3	O60667	FAIM3	0.434783	0.000189134	0.0110359
EDA2R.3083.71	XEDAR	Q9HAV5	EDA2R	0.43365	0.000197425	0.0113825
MFAP2.10569.28	MFAP2	P55001	MFAP2	0.430617	0.000221292	0.0117771
NRP1.5542.22	NRP1	O14786	NRP1	0.425758	0.000265109	0.0133742
TXNDC5.11212.7	TXND5	Q8NBS9	TXNDC5	0.419291	0.000335756	0.0154215
TPMT.11218.84	TPMT	P51580	TPMT	0.417976	0.00035208	0.0157882
IL1R2.14133.93	IL-1 sRII	P27930	IL1R2	0.416588	0.000370095	0.0161475
SORT1.11300.32	SORT	Q99523	SORT1	0.415418	0.000385914	0.0164589
CLSTN2.18882.7	CSTN2	Q9H4D0	CLSTN2	0.414432	0.000399739	0.0166891
SMEK1.10866.60	P4R3A	Q6IN85	SMEK1	0.412642	0.00042599	0.0176199
MMP19.6425.87	MMP19	Q99542	MMP19	0.406467	0.000529054	0.0204977
TNFSF11.14061.48	sRANKL	O14788	TNFSF11	0.405736	0.000542647	0.020662
FAS.9459.7	Fas, soluble	P25445	FAS	0.403507	0.000586092	0.0214493
TFF1.9185.15	TFF1	P04155	TFF1	0.403361	0.000589049	0.0214493
TREM1.9266.1	sTREM-1	Q9NP99	TREM1	0.40084	0.000642231	0.022059
TMEM190.10442.1	TM190	Q8WZ59	TMEM190	0.400183	0.000656804	0.0223384
SPON1.4297.62	Spondin-1	Q9HCB6	SPON1	0.397369	0.000722598	0.0238064
ICAM5.8245.27	sICAM-5	Q9UMF0	ICAM5	0.391195	0.000888448	0.0282802
GCNT1.7016.12	GCNT1	Q02742	GCNT1	0.387395	0.00100693	0.0293414
PLS1.12737.12	PLSI	Q14651	PLS1	0.386774	0.00102761	0.0293828
MRC1.2637.77	Macrophage mannose receptor	P22897	MRC1	0.386591	0.00103376	0.0293828
C5.2381.52	C5	P01031	C5	0.385495	0.00107138	0.0299267
CKB.3800.71	CK-BB	P12277	CKB	0.384034	0.00112347	0.0307399
DEFB110.8340.9	DB110	Q30KQ9	DEFB110	0.380343	0.00126532	0.0329461
NRP2.15387.44	Neuropilin-2	O60462	NRP2	0.379576	0.00129677	0.0334057
IL1RAPL2.5082.51	IL-1 sR9	Q9NP60	IL1RAPL2	0.378992	0.00132121	0.0338551
PACAP.16322.10	PACAP	Q8WU39	PACAP	0.37764	0.00137931	0.0342563
NRG4.14139.16	NRG4	Q8WWG1	NRG4	0.376872	0.00141329	0.0347441
EDN2.12574.36	Endothelin 2	P20800	EDN2	0.375155	0.00149212	0.0363132
FAM19A2.6430.36	F19A2	Q8N3H0	FAM19A2	0.374826	0.00150765	0.0363262
WWC1.18284.77	WWC1	Q8IX03	WWC1	0.374096	0.0015427	0.0367504
SLC5A8.13691.10	SC5A8	Q8N695	SLC5A8	0.371319	0.00168268	0.0386219
DYNLRB2.17827.53	DLRB2	Q8TF09	DYNLRB2	0.369529	0.00177888	0.0397909
WFDC2.11388.75	HE4	Q14508	WFDC2	0.369456	0.00178291	0.0397909
C5.C6.4482.66	C5b, 6 Complex	P01031,P13671	C5 C6	0.369017	0.00180726	0.0401493
AZGP1.9312.8	AZGP1	P25311	AZGP1	0.368213	0.00185267	0.0406911
SEPT3.18316.75	SEPT3	Q9UH03	SEPT3	0.36814	0.00185685	0.0406911
EXOSC1.7930.3	EXOS1	Q9Y3B2	EXOSC1	0.367556	0.00189059	0.0410589
DENR.19287.59	DENR	O43583	DENR	0.363208	0.00215929	0.0440096
ZG16.8219.14	ZG16	O60844	ZG16	0.359847	0.00238996	0.0462849
SOST.13101.60	SOST	Q9BQB4	SOST	0.357581	0.0025576	0.0487655
WFDC1.9316.67	WFDC1	Q9HC57	WFDC1	0.356303	0.00265681	0.050229
TNFRSF9.14025.18	4-1BB	Q07011	TNFRSF9	0.35528	0.00273863	0.0512092
OPALIN.7736.28	OPALI	Q96PE5	OPALIN	0.354622	0.00279241	0.0516727
HK2.13130.150	HXK2	P52789	HK2	0.354585	0.00279543	0.0516727
MFAP2.9294.45	MFAP2	P55001	MFAP2	0.353891	0.00285328	0.0521458
PDGFD.9341.1	PDGFD	Q9GZP0	PDGFD	0.35338	0.00289658	0.0523438
RNF148.9955.40	RN148	Q8N7C7	RNF148	0.351114	0.00309549	0.0543749
ISM1.8355.80	ISM1	B1AKI9	ISM1	0.349251	0.00326814	0.0555766
HSPG2.15626.223	Perlecan	P98160	HSPG2	0.349141	0.00327856	0.0555766
GSTO1.12436.84	GST omega-1	P78417	GSTO1	0.34673	0.00351535	0.0580908
SELP.4154.57	P-Selectin	P16109	SELP	0.346693	0.00351905	0.0580908
CDHR1.8372.29	CDHR1	Q96JP9	CDHR1	0.346255	0.00356375	0.0583011
SYT9.8066.38	SYT9	Q86SS6	SYT9	0.345634	0.00362793	0.0583011
ABHD14B.19325.21	ABHEB	Q96IU4	ABHD14B	0.345086	0.0036854	0.0585194
CPB2.3518.54	TAFI	Q96IY4	CPB2	0.34388	0.00381472	0.0594041
CCL16.4913.78	HCC-4	O15467	CCL16	0.341871	0.00403921	0.062299
OGN.17224.12	MIME	P20774	OGN	0.340482	0.00420108	0.0641824
LRP12.15506.34	LRP12	Q9Y561	LRP12	0.338838	0.00440019	0.0661805
SULT4A1.8357.43	ST4A1	Q9BR01	SULT4A1	0.337961	0.00450976	0.0668597
ANGPTL4.3796.79	ANGL4	Q9BY76	ANGPTL4	0.337231	0.00460291	0.0677565
PROS1.2700.56	Protein S	P07225	PROS1	0.336865	0.00465012	0.0680378
EFS.12572.236	EFS	O43281	EFS	0.336244	0.00473136	0.0682658
ID2.15403.53	ID2	Q02363	ID2	0.334929	0.00490755	0.0696987
GAGE2D.18273.14	GGE2D	Q9UEU5	GAGE2D	0.33471	0.00493747	0.0697148
MAGEA8.18326.50	MAGA8	P43361	MAGEA8	0.334088	0.00502313	0.0706558
PPCDC.13996.16	COAC	Q96CD2	PPCDC	0.332627	0.00522988	0.0724395
P2RX6.7233.73	P2RX6	O15547	P2RX6	0.33259	0.00523515	0.0724395
PTPN7.14688.6	PTN7	P35236	PTPN7	0.331896	0.00533605	0.0732082
INSL4.6410.26	INSL4	Q14641	INSL4	0.331202	0.00543866	0.0735739
BRD1.11607.15	BRD1	O95696	BRD1	0.330727	0.00550987	0.0743296
IL12RB2.3815.14	IL-12 RB2	Q99665	IL12RB2	0.329594	0.00568301	0.0756121
NOVA1.12557.18	NOVA1	P51513	NOVA1	0.329594	0.00568301	0.0756121
CD248.15491.20	CD248	Q9HCU0	CD248	0.329448	0.00570569	0.075706
IGHA1.IGHA2.11089.7	IgA	P01876 P01877	IGHA1 IGHA2	0.327037	0.0060917	0.0790387
TMEM9.8597.1	TMEM9	Q9P0T7	TMEM9	0.325977	0.00626846	0.0805256
FN1.3434.34	FN1.3	P02751	FN1	0.325502	0.00634915	0.0813464
GP1BA.4990.87	GP1BA	P07359	GP1BA	0.324479	0.00652605	0.0826022
GSKIP.12849.25	GSKIP	Q9P0R6	GSKIP	0.324443	0.00653245	0.0826022
PLTP.15475.4	PLTP	P55058	PLTP	0.323712	0.00666155	0.0833641
SUN3.8852.10	SUN3	Q8TAQ9	SUN3	0.323383	0.00672038	0.0836679
PEF1.19272.9	PEF1	Q9UBV8	PEF1	0.321228	0.00711744	0.0863417
CST7.3302.58	CYTF	O76096	CST7	0.320972	0.00716589	0.0864968
ADCYAP1.8446.4	PACAP-27	P18509	ADCYAP1	0.31973	0.00740535	0.0887244
GCNT2.7143.9	GNT2C	Q8NFS9	GCNT2	0.319657	0.00741966	0.0887244
ALDH3B1.12940.35	AL3B1	P43353	ALDH3B1	0.319072	0.00753494	0.0894405
NDUFB8.9800.20	NDUB8	O95169	NDUFB8	0.318926	0.00756401	0.0895197
FGFBP1.15494.11	FGFP1	Q14512	FGFBP1	0.318524	0.00764445	0.0896418
PMEPA1.6936.7	PMEPA	Q969W9	PMEPA1	0.313993	0.00860438	0.0969093
PRSS2.5034.79	Trypsin 2	P07478	PRSS2	0.313665	0.00867798	0.0972858
PNLIPRP1.6627.25	LIPR1	P54315	PNLIPRP1	0.313372	0.00874387	0.0975727
ZNF10.11567.23	ZNF10	P21506	ZNF10	0.311655	0.00913983	0.101523
APLP2.10627.87	APLP2	Q06481	APLP2	0.311107	0.00926946	0.101796
EDDM3B.7782.34	EP3B	P56851	EDDM3B	0.310596	0.00939188	0.102907
NANP.16863.47	NANP	Q8TBE9	NANP	0.309792	0.00958711	0.104435
FGF3.7894.155	FGF-3	P11487	FGF3	0.309755	0.00959607	0.104435
PPBP.17165.1	BTG	P02775	PPBP	0.309463	0.00966799	0.104747
LTA.4703.87	TNF-b	P01374	LTA	0.309207	0.00973131	0.105062
TNC.6259.60	Tenascin	P24821	TNC	0.309171	0.00974038	0.105062
FADD.16593.3	FADD	Q13158	FADD	0.308659	0.00986821	0.105968
TNKS.9907.216	Tankyrase-1	O95271	TNKS	0.307015	0.010289	0.109276
RBP1.19279.42	CRBP	P09455	RBP1	0.306869	0.0103272	0.109441
HRAS.18900.37	H-ras (WT)	P01112	HRAS	0.30643	0.0104423	0.11042
MMP2.4160.49	MMP-2	P08253	MMP2	0.306321	0.0104713	0.110449
C16orf54.12394.53	CP054	Q6UWD8	C16orf54	0.305846	0.0105977	0.111333
PPBP.2790.54	NAP-2	P02775	PPBP	0.304823	0.0108743	0.113429
TIMP3.2480.58	TIMP-3	P35625	TIMP3	0.304713	0.0109043	0.113429
DRAXIN.7084.1	DRAXI	Q8NBI3	DRAXIN	0.304056	0.0110859	0.114198
F9.5307.12	Coagulation Factor IXab	P00740	F9	0.303727	0.0111777	0.114689
LAMA2.LAMB1.LAMC1.18347.15	Laminin-2	P24043 P07942 P11047	LAMA2 LAMB1 LAMC1	0.302229	0.0116041	0.117817
GSTM4.18895.54	GSTM4	Q03013	GSTM4	0.301425	0.0118387	0.119447
IRF4.19564.61	IRF4	Q15306	IRF4	0.301206	0.0119034	0.11985
PROC.3758.68	Activated Protein C	P04070	PROC	0.301023	0.0119575	0.120145
CA9.3798.71	Carbonic anhydrase 9	Q16790	CA9	0.300658	0.0120664	0.120563
NAB2.13680.3	NAB2	Q15742	NAB2	0.300585	0.0120883	0.120563
DSG3.16317.20	Desmoglein-3	P32926	DSG3	0.300548	0.0120992	0.120563
OLFM3.10643.16	NOE3	Q96PB7	OLFM3	0.300475	0.0121212	0.120563
SEMA3B.5667.3	SEM3B	Q13214	SEMA3B	0.3	0.0122646	0.120973
APOA4.17685.9	Apo A-IV	P06727	APOA4	0.299379	0.0124544	0.121716
LTF.2780.35	Lactoferrin	P02788	LTF	0.29916	0.012522	0.12202
ICAM4.6550.4	ICAM4	Q14773	ICAM4	0.2981	0.0128532	0.124064
JAG1.7754.11	JAG1	P78504	JAG1	0.2981	0.0128532	0.124064
IGFBPL1.7815.49	IBPL1	Q8WX77	IGFBPL1	0.297662	0.0129924	0.124107
TNC.5738.25	Tenascin	P24821	TNC	0.297369	0.0130859	0.124509
CRH.5614.44	CRH	P06850	CRH	0.296529	0.0133581	0.125993
COL18A1.2201.17	Endostatin	P39060	COL18A1	0.296419	0.013394	0.125993
STOM.8261.51	STOM	P27105	STOM	0.2962	0.013466	0.125993
PDIA4.7146.16	PDIA4	P13667	PDIA4	0.296127	0.01349	0.125993
MMEL1.3627.71	MMEL2	Q495T6	MMEL1	0.295944	0.0135504	0.126201
ABHD12.7825.7	ABD12	Q8N2K0	ABHD12	0.295543	0.0136839	0.126713
IL32.9051.13	IL32	P24001	IL32	0.294921	0.0138925	0.127258
F8.13499.30	Coagulation Factor VIII	P00451	F8	0.293972	0.0142169	0.128456
COL28A1.10702.1	COSA1	Q2UY09	COL28A1	0.293423	0.0144069	0.129689
KIAA1024.9075.121	K1024	Q9UPX6	KIAA1024	0.293022	0.0145477	0.130472
CELA2A.7140.1	ELA2A	P08217	CELA2A	0.291487	0.0150962	0.134149
PTH2.7257.18	TIP39	Q96A98	PTH2	0.291341	0.0151494	0.134374
FGF5.3065.65	FGF-5	P12034	FGF5	0.29061	0.0154176	0.136503
INHBB.16746.12	Activin B	P09529	INHBB	0.290099	0.0156077	0.137055
FGF22.9513.9	FGF22	Q9HCT0	FGF22	0.290062	0.0156214	0.137055
EREG.4956.2	EPI	O14944	EREG	0.289879	0.0156898	0.137406
CGA.14056.4	Glycoprotein hormones a-chain	P01215	CGA	0.289697	0.0157585	0.137751
SCARF1.5129.12	SREC-I	Q14162	SCARF1	0.288491	0.0162185	0.140011
PPBP.4544.4	CTAP-III	P02775	PPBP	0.288381	0.0162609	0.140127
FGFBP3.11219.95	FGFP3	Q8TAT2	FGFBP3	0.287797	0.0164886	0.141207
PCYOX1.6431.68	PCYOX	Q9UHG3	PCYOX1	0.28776	0.0165029	0.141207
MMP8.9172.69	MMP-8	P22894	MMP8	0.285568	0.0173818	0.145892
VRK1.12553.5	VRK1	Q99986	VRK1	0.285422	0.0174418	0.146143
FN1.4131.72	Fibronectin	P02751	FN1	0.285276	0.0175019	0.146394
MFNG.5605.77	MFNG	O00587	MFNG	0.284655	0.0177596	0.147657
F9.4876.32	Coagulation Factor IX	P00740	F9	0.284618	0.0177749	0.147657
HGF.2681.23	HGF	P14210	HGF	0.283961	0.0180515	0.149442
EFNA3.14153.8	Ephrin-A3	P52797	EFNA3	0.283705	0.0181601	0.149574
ST6GAL1.6035.2	SIAT1	P15907	ST6GAL1	0.283486	0.0182536	0.14958
TNC.7131.207	Tenascin	P24821	TNC	0.283486	0.0182536	0.14958
AMY1A.7918.114	Amylase, alpha 1A	P04745	AMY1A	0.283193	0.0183789	0.150353
EPHA10.5076.53	EPHAA	Q5JZY3	EPHA10	0.282791	0.0185524	0.15139
REG3A.15304.1	PAP1	Q06141	REG3A	0.28217	0.0188233	0.152448
NPTX1.9256.78	NPTX1	Q15818	NPTX1	0.282134	0.0188393	0.152448
GREM2.5598.3	GREM2	Q9H772	GREM2	0.282097	0.0188553	0.152448
IL31RA.8273.84	IL31R	Q8NI17	IL31RA	0.281988	0.0189036	0.152583
UPP1.19448.104	UPP1	Q16831	UPP1	0.281841	0.018968	0.152849
RAB27A.9504.19	RB27A	P51159	RAB27A	0.281513	0.0191137	0.153512
EVPL.14019.73	EVPL	Q92817	EVPL	0.280891	0.0193916	0.154488
TNFSF10.8833.20	TRAIL	P50591	TNFSF10	0.280891	0.0193916	0.154488
BLMH.14250.115	BLMH	Q13867	BLMH	0.280745	0.0194575	0.154488
RNASE4.5644.60	RNAS4	P34096	RNASE4	0.280672	0.0194905	0.154488
LCN2.2836.68	Lipocalin 2	P80188	LCN2	0.280234	0.0196896	0.155557
RSPO1.6240.70	RSPO1	Q2MKA7	RSPO1	0.279759	0.0199072	0.15651
NCR3LG1.7854.38	NR3L1	Q68D85	NCR3LG1	0.279576	0.0199914	0.156664
KCNAB2.10015.119	KCAB2	Q13303	KCNAB2	0.279393	0.020076	0.157073
MSH2.9739.4	MSH2	P43246	MSH2	0.279028	0.020246	0.158147
ITGB2.12750.9	LFA-1 beta-2	P05107	ITGB2	0.278626	0.0204344	0.159362
FGFR4.4988.49	FGFR4	P22455	FGFR4	0.278444	0.0205205	0.15952
IGHE.IGK.IGL.4135.84	IgE	P01854	IGHE IGK@ IGL@	0.278444	0.0205205	0.15952
PARP1.8893.29	PARP	P09874	PARP1	0.277676	0.0208857	0.16081
CDH2.3797.1	Cadherin-2	P19022	CDH2	0.277238	0.0210969	0.162178
SHC4.11692.21	SHC4	Q6S5L8	SHC4	0.276872	0.0212742	0.162766
TAGLN.15640.54	TAGL	Q01995	TAGLN	0.276653	0.0213812	0.163327
NMES1.6406.3	NMES1	Q9C002	NMES1	0.275557	0.0219232	0.166035
MXI1.9035.2	MXI1	P50539	MXI1	0.275521	0.0219415	0.166035
SNRPB2.17364.8	RU2B	P08579	SNRPB2	0.275448	0.021978	0.166052
ITGAL.11617.1	LFA-1 alpha-L chain	P20701	ITGAL	0.275119	0.0221432	0.16704
APOB.2797.56	Apo B	P04114	APOB	0.274388	0.0225141	0.169574
CEL.9796.4	CEL	P19835	CEL	0.273255	0.0230994	0.17264
FAM24B.8775.61	FA24B	Q8N5W8	FAM24B	0.272634	0.0234259	0.174333
POLR2J.19199.3	RPB11	P52435	POLR2J	0.272452	0.0235226	0.174333
NETO1.15298.199	NETO1	Q8TDF5	NETO1	0.272415	0.023542	0.174333
NMNAT1.18932.84	NMNA1	Q9HAN9	NMNAT1	0.272159	0.0236781	0.174807
IGHG4.13231.90	IgG4, Kappa	P01861	IGHG4	0.271355	0.0241102	0.175997
PIM1.5359.65	PIM1	P11309	PIM1	0.271173	0.0242094	0.176045
SCARA5.10419.1	SCAR5	Q6ZMJ2	SCARA5	0.270259	0.0247103	0.178615
CCNB1IP1.9728.4	CIP1	Q9NPC3	CCNB1IP1	0.269894	0.0249131	0.179278
EFNB1.13104.32	EFNB1	P98172	EFNB1	0.269163	0.0253229	0.18115
RFXAP.12726.3	RFXAP	O00287	RFXAP	0.268798	0.0255299	0.182094
VWC2L.7995.16	VWC2L	B2RUY7	VWC2L	0.268579	0.0256549	0.182715
MMP1.4924.32	MMP-1	P03956	MMP1	0.267885	0.0260538	0.184712
PDE1A.5253.1	PDE1A	P54750	PDE1A	0.267775	0.0261173	0.184712
PMM1.17408.2	PMM1	Q92871	PMM1	0.267738	0.0261385	0.184712
RGS1.18945.11	RGS1	Q08116	RGS1	0.267702	0.0261597	0.184712
BPI.4126.22	BPI	P17213	BPI	0.267665	0.0261809	0.184712
CXCL9.11593.21	MIG	Q07325	CXCL9	0.267629	0.0262021	0.184712
SMCO2.7925.18	CL070	A6NFE2	SMCO2	0.267483	0.0262872	0.185042
BAGE3.6442.6	BAGE3	Q86Y29	BAGE3	0.26741	0.0263298	0.185073
USP28.19562.8	UBP28	Q96RU2	USP28	0.26719	0.026458	0.185618
REG1A.13095.51	PSP	P05451	REG1A	0.267008	0.0265653	0.18565
WFDC10B.10695.12	WF10B	Q8IUB3	WFDC10B	0.266058	0.0271289	0.188772
PGK2.13936.24	PGK2	P07205	PGK2	0.265437	0.0275028	0.190825
ALPPL2.6715.63	PPBN	P10696	ALPPL2	0.264304	0.0281959	0.193572
TNFRSF13B.2704.74	TACI	O14836	TNFRSF13B	0.264267	0.0282185	0.193572
GSTT2B.11273.176	GSTT2	P0CG30	GSTT2B	0.263756	0.0285365	0.194925
ZG16B.8310.6	U773	Q96DA0	ZG16B	0.263683	0.0285821	0.194962
IGDCC3.11952.1	IGDC3	Q8IVU1	IGDCC3	0.263464	0.0287195	0.195349
TRAPPC4.7007.24	TRAPPC4	Q9Y296	TRAPPC4	0.263354	0.0287884	0.195542
ART3.7970.315	NAR3	Q13508	ART3	0.263208	0.0288805	0.195542
GMPR.19254.125	GMPR1	P36959	GMPR	0.262514	0.0293213	0.197227
SCARF2.9925.56	SREC-II	Q96GP6	SCARF2	0.262331	0.0294383	0.197348
THOC1.9875.107	THOC1	Q96FV9	THOC1	0.262294	0.0294617	0.197348
HAPLN1.3196.6	HPLN1	P10915	HAPLN1	0.262039	0.0296262	0.197903
ZNF264.9993.11	ZN264	O43296	ZNF264	0.262039	0.0296262	0.197903
VEGFB.9453.12	VEGF-B	P49765	VEGFB	0.261089	0.0302439	0.199824
ADAM30.8520.8	ADA30	Q9UKF2	ADAM30	0.260943	0.0303399	0.199845
DAG1.8369.102	DAG1	Q14118	DAG1	0.260833	0.030412	0.199845
TNC.6260.14	Tenascin	P24821	TNC	0.260723	0.0304843	0.199936
ITM2C.9523.34	ITM2C	Q9NQX7	ITM2C	0.25992	0.0310189	0.202459
KLK9.5758.49	kallikrein 9	Q9UKQ9	KLK9	0.259408	0.0313632	0.204156
KIR3DS1.5097.14	KI3S1	Q14943	KIR3DS1	0.259152	0.0315366	0.205009
LRRC24.9989.12	LRC24	Q50LG9	LRRC24	0.258714	0.0318356	0.206431
KREMEN1.17331.138	KREM1	Q96MU8	KREMEN1	0.258458	0.0320111	0.206431
MOBKL3.19332.1	MOBL3	Q9Y3A3	MOBKL3	0.257837	0.0324408	0.208094
PRLR.5114.65	Prolactin Receptor	P16471	PRLR	0.257727	0.0325171	0.208307
SLIT3.18931.40	SLIT3	O75094	SLIT3	0.257508	0.0326702	0.208736
YWHAQ.7625.27	14-3-3 protein theta	P27348	YWHAQ	0.257508	0.0326702	0.208736
FAM19A5.5609.92	F19A5	Q7Z5A7	FAM19A5	0.257289	0.0328239	0.208891
MRPL34.6933.20	RM34	Q9BQ48	MRPL34	0.256558	0.0333406	0.211623
PPP1R3B.12768.3	PPR3B	Q86XI6	PPP1R3B	0.256449	0.0334187	0.211841
VAMP1.17711.13	VAMP1	P23763	VAMP1	0.256376	0.0334709	0.211895
DSC2.13126.52	DSC2	Q02487	DSC2	0.25601	0.0337326	0.21233
FGF8.17166.4	FGF-8F	P55075	FGF8	0.25601	0.0337326	0.21233
COL6A3.11196.31	Collagen alpha-3(VI)	P12111	COL6A3	0.255974	0.0337589	0.21233
CLEC7A.3603.60	CLC7A	Q9BXN2	CLEC7A	0.255828	0.0338641	0.212716
PLVAP.8565.160	PLVAP	Q9BX97	PLVAP	0.255389	0.0341815	0.214154
HDGFRP2.4553.65	HDGR2	Q7Z4V5	HDGFRP2	0.255243	0.0342878	0.214266
CASP10.5340.24	Caspase-10	Q92851	CASP10	0.254805	0.0346085	0.215436
METTL1.12514.16	METTL1	Q9UBP6	METTL1	0.254366	0.0349317	0.216571
F13A1.F13B.16927.9	Coagulation factor XIII	P00488, P05160	F13A1 F13B	0.25433	0.0349587	0.216571
STMN4.6267.51	STMN4	Q9H169	STMN4	0.254183	0.0350671	0.216571
TENM4.11365.17	TEN4	Q6N022	TENM4	0.25411	0.0351214	0.216571
ERLEC1.8957.72	XTP3B	Q96DZ1	ERLEC1	0.253708	0.0354212	0.217697
TCL1B.18276.34	TCL1B	O95988	TCL1B	0.253453	0.0356131	0.218599
MATK.3823.9	MATK	P42679	MATK	0.25338	0.0356681	0.218659
ANG.4874.3	Angiogenin	P03950	ANG	0.252576	0.0362776	0.220889
PDZD11.6219.14	PDZ11	Q5EBL8	PDZD11	0.252357	0.0364454	0.221184
NDUFA5.19200.16	NDUA5	Q16718	NDUFA5	0.252174	0.0365856	0.22148
ADAMDEC1.9115.78	ADEC1	O15204	ADAMDEC1	0.251882	0.036811	0.222289
TGFBR3.3009.3	TGF-b R III	Q03167	TGFBR3	0.251809	0.0368675	0.222353
TGFBI.3283.21	BGH3	Q15582	TGFBI	0.251735	0.0369241	0.222417
LST1.9531.24	LST1	O00453	LST1	0.25137	0.0372082	0.223466
PTK7.9525.1	PTK7	Q13308	PTK7	0.250603	0.0378107	0.22635
TNFRSF10D.14121.24	TRAIL R4	Q9UBN6	TNFRSF10D	0.250237	0.0381004	0.227522
ZNRF3.14122.132	ZNRF3	Q9ULT6	ZNRF3	0.250091	0.0382168	0.22779
FGFR2.3808.76	FGFR-2	P21802	FGFR2	0.249945	0.0383335	0.22779
PLXNB3.16922.53	PLXB3	Q9ULL4	PLXNB3	0.249945	0.0383335	0.22779
DGCR14.11356.19	DGC14	Q96DF8	DGCR14	0.249726	0.0385091	0.228274
CLEC4G.10781.19	CLC4G	Q6UXB4	CLEC4G	0.249214	0.0389214	0.229874
ACAD8.11406.82	ACAD8	Q9UKU7	ACAD8	0.249032	0.0390696	0.230187
THRA.12527.50	THA	P10827	THRA	0.249032	0.0390696	0.230187
MSRB3.7824.88	MSRB3	Q8IXL7	MSRB3	0.248922	0.0391587	0.230432
HSPA1A.11157.35	HSP 70	P0DMV8	HSPA1A	0.248813	0.039248	0.230677
TGFB1.2333.72	TGF-b1	P01137	TGFB1	0.248557	0.039457	0.231064
NDST1.6927.7	NDST1	P52848	NDST1	0.248338	0.0396368	0.231837
APOH.8288.27	b2-Glycoprotein I	P02749	APOH	0.248009	0.0399079	0.23286
SLC25A18.5280.68	GHC2	Q9H1K4	SLC25A18	0.247753	0.0401198	0.233534
RRAS2.12361.102	RRAS2	P62070	RRAS2	0.247534	0.0403022	0.233797
EGLN1.9901.28	EGLN1	Q9GZT9	EGLN1	0.247497	0.0403326	0.233797
EFEMP1.8480.29	FBLN3	Q12805	EFEMP1	0.247388	0.0404241	0.233797
ACP5.3232.28	TrATPase	P13686	ACP5	0.247351	0.0404547	0.233797
SIGLEC11.8913.22	SIG11	Q96RL6	SIGLEC11	0.247059	0.0406997	0.234653
PLA2G2C.8850.5	PA2GC	Q5R387	PLA2G2C	0.246986	0.0407611	0.234728
B3GALT1.9541.15	B3GT1	Q9Y5Z6	B3GALT1	0.246657	0.0410385	0.235485
TCL1A.17210.2	TCL1A	P56279	TCL1A	0.246511	0.0411623	0.235916
ROR2.7861.9	ROR2	Q01974	ROR2	0.246292	0.0413486	0.236602
HAVCR1.9021.1	TIM-1	Q96D42	HAVCR1	0.246072	0.0415356	0.236633
GREM1.18878.15	GREM1	O60565	GREM1	0.245999	0.0415981	0.236633
RAN.4282.3	RAN	P62826	RAN	0.245963	0.0416294	0.236633
COLGALT2.7234.12	GT252	Q8IYK4	COLGALT2	0.245634	0.0419117	0.23758
CTNNA2.9872.23	CTNA2	P26232	CTNNA2	0.245415	0.0421007	0.238155
CD1D.8749.194	CD1D	P15813	CD1D	0.245195	0.0422905	0.238155
MBTPS1.7240.2	MBTP1	Q14703	MBTPS1	0.245195	0.0422905	0.238155
TNC.4155.3	Tenascin	P24821	TNC	0.244976	0.042481	0.238672
PGLYRP1.3329.14	PGRP-S	O75594	PGLYRP1	0.24483	0.0426084	0.238834
ICAM5.5124.69	sICAM-5	Q9UMF0	ICAM5	0.244684	0.0427361	0.239273
RSPO2.4566.24	RSPO2	Q6UXX9	RSPO2	0.244574	0.0428321	0.239533
NTMT1.12454.105	NTM1A	Q9BV86	NTMT1	0.244099	0.0432501	0.241314
GJA1.9937.7	CXA1	P17302	GJA1	0.243442	0.0438344	0.244292
ANK2.7624.19	ANK2	Q01484	ANK2	0.243369	0.0438998	0.244375
FCER2.3291.30	CD23	P06734	FCER2	0.242748	0.0444583	0.246436
RMDN3.9290.8	RMD3	Q96TC7	RMDN3	0.242711	0.0444913	0.246436
THBS1.3474.19	Thrombospondin-1	P07996	THBS1	0.242346	0.0448228	0.247522
FAM162B.11163.7	F162B	Q5T6X4	FAM162B	0.242163	0.0449893	0.247876
CLPS.5749.53	COL	P04118	CLPS	0.241725	0.045391	0.24892
IL22RA1.3620.67	IL22RA1	Q8N6P7	IL22RA1	0.241578	0.0455255	0.24892
PSG4.5649.83	PSG4	Q00888	PSG4	0.241469	0.0456266	0.24892
BDNF.2421.7	BDNF	P23560	BDNF	0.241396	0.0456941	0.24892
EIF1AX.9850.38	IF1AX	P47813	EIF1AX	0.240884	0.0461691	0.250108
BCL2L10.7249.307	B2L10	Q9HD36	BCL2L10	0.240738	0.0463055	0.250288
CAND1.13937.75	CAND1	Q86VP6	CAND1	0.240665	0.0463739	0.250378
B2M.10574.10	b2-Microglobulin	P61769	B2M	0.240409	0.0466137	0.251113
IL3.4717.55	IL-3	P08700	IL3	0.240227	0.0467857	0.25148
NMRAL1.13988.67	NMRL1	Q9HBL8	NMRAL1	0.239788	0.0472005	0.252031
PSG3.6444.15	PSG3	Q16557	PSG3	0.239642	0.0473394	0.252217
ITCH.12551.3	ITCH	Q96J02	ITCH	0.239569	0.047409	0.25231
NTS.7857.22	NEUT	P30990	NTS	0.238802	0.0481449	0.255105
YTHDC1.8878.48	YTDC1	Q96MU7	YTHDC1	0.2384	0.0485341	0.255768
APOC3.6461.54	Apo C-III	P02656	APOC3	0.238327	0.0486051	0.255864
CSNK1D.11289.31	KC1D	P48730	CSNK1D	0.237998	0.0489258	0.256993
TFPI.3336.50	TFPI	P10646	TFPI	0.23745	0.0494642	0.258699
RELL1.13399.33	RELL1	Q8IUW5	RELL1	0.236792	0.0501167	0.261174
CTSB.8007.19	Cathepsin B	P07858	CTSB	0.236756	0.0501532	0.261174
RPL12.19183.164	RL12	P30050	RPL12	0.236354	0.0505556	0.262705
ITPKC.12507.16	IP3KC	Q96DU7	ITPKC	0.236171	0.0507394	0.263195
CCL26.9168.31	Eotaxin-3	Q9Y258	CCL26	0.236098	0.0508131	0.263195
TNC.5675.6	Tenascin	P24821	TNC	0.236098	0.0508131	0.263195
H2AFZ.4163.5	Histone H2A.z	P0C0S5	H2AFZ	0.236025	0.0508868	0.263296
LRP1B.11275.94	LRP1B	Q9NZR2	LRP1B	0.235696	0.0512198	0.263891
SOD1.2794.60	SOD	P00441	SOD1	0.235404	0.0515173	0.264579
FAAH2.8396.42	FAAH2	Q6GMR7	FAAH2	0.235221	0.051704	0.265182
SPTLC2.7267.2	LCB2	O15270	SPTLC2	0.235075	0.0518537	0.265182
CCL5.5480.49	RANTES	P13501	CCL5	0.234819	0.0521165	0.265965
BCAR3.5262.57	BCAR3	O75815	BCAR3	0.234563	0.0523805	0.266459
FLT1.16315.105	VEGF sR1	P17948	FLT1	0.234527	0.0524183	0.266459
SLPI.4413.3	SLPI	P03973	SLPI	0.234527	0.0524183	0.266459
KIR3DL2.5096.51	KI3L2	P43630	KIR3DL2	0.234198	0.0527595	0.266459
SERPINE2.19154.41	Protease nexin I	P07093	SERPINE2	0.234198	0.0527595	0.266459
PSMA1.3859.50	PSA1	P25786	PSMA1	0.234161	0.0527975	0.266459
ULBP2.3082.9	ULBP-2	Q9BZM5	ULBP2	0.234161	0.0527975	0.266459
THBS2.14111.15	TSP2	P35442	THBS2	0.234125	0.0528355	0.266459
TICAM2.17696.1	TIRP	Q86XR7	TICAM2	0.234088	0.0528736	0.266459
IL12A.IL12B.10367.62	IL-12	P29459, P29460	IL12A IL12B	0.233979	0.0529879	0.26648
TSSK1B.11179.7	TSSK1	Q9BXA7	TSSK1B	0.233979	0.0529879	0.26648
C7orf69.9544.24	CG069	Q9H7B7	C7orf69	0.23376	0.0532172	0.267078
PTGS2.3761.4	COX-2	P35354	PTGS2	0.23354	0.0534472	0.267871
ADAMTS5.3168.8	ADAMTS-5	Q9UNA0	ADAMTS5	0.233321	0.0536781	0.26828
POMC.2558.51	b-Endorphin	P01189	POMC	0.232846	0.0541811	0.269958
ARHGDIA.6454.38	Rho-GDIa	P52565	ARHGDIA	0.232773	0.0542589	0.269984
SEMA3A.3222.11	Semaphorin 3A	Q14563	SEMA3A	0.23259	0.0544536	0.270397
DOCK9.14002.18	DOCK9	Q9BZ29	DOCK9	0.232554	0.0544926	0.270397
ETNK1.8328.9	EKI1	Q9HBU6	ETNK1	0.232115	0.0549625	0.271893
WISP2.6392.7	WISP-2	O76076	WISP2	0.232006	0.0550805	0.272116
ERP44.6064.4	TXNDC4	Q9BS26	ERP44	0.231312	0.0558326	0.274515
FATE1.7740.33	FATE1	Q969F0	FATE1	0.231312	0.0558326	0.274515
TIMP2.2278.61	TIMP-2	P16035	TIMP2	0.230581	0.0566334	0.276766
SAP18.12830.4	SAP18	O00422	SAP18	0.229521	0.057811	0.281302
NPS.6390.18	NPS	P0C0P6	NPS	0.229485	0.0578519	0.281302
TSTA3.12657.2	FCL	Q13630	TSTA3	0.228791	0.0586346	0.283967
DCUN1D2.19511.8	DCNL2	Q6PH85	DCUN1D2	0.228645	0.0588005	0.284403
ALDH5A1.17792.158	SSDH	P51649	ALDH5A1	0.228608	0.058842	0.284403
S100A14.17828.3	S100A14	Q9HCY8	S100A14	0.228535	0.0589252	0.284521
LIF.7790.21	LIF	P15018	LIF	0.228316	0.0591751	0.285159
PRDX4.7789.182	PRDX4	Q13162	PRDX4	0.228243	0.0592586	0.285278
LOC652493.6561.77	Ig K chain V-I region HK102-like	#N/A	LOC652493	0.227658	0.0599301	0.287653
DLG3.7897.75	DLG3	Q92796	DLG3	0.227512	0.060099	0.288177
SATB1.13511.29	SATB1	Q01826	SATB1	0.227402	0.0602258	0.2885
CHGB.8235.48	SCG1	P05060	CHGB	0.227329	0.0603105	0.288538
COL6A5.11155.16	CO6A5	A8TX70	COL6A5	0.227293	0.0603529	0.288538
KIAA1467.7892.132	K1467	A2RU67	KIAA1467	0.226964	0.0607355	0.289147
RGMA.5483.1	RGMA	Q96B86	RGMA	0.226818	0.0609062	0.289147
UBTD2.12875.28	UBTD2	Q8WUN7	UBTD2	0.226818	0.0609062	0.289147
IGF2R.16057.6	IGF-II receptor	P11717	IGF2R	0.226672	0.0610773	0.289147
SLAMF7.5487.7	SLAF7	Q9NQ25	SLAMF7	0.226672	0.0610773	0.289147
ZNF329.12803.9	ZN329	Q86UD4	ZNF329	0.226416	0.0613775	0.290001
TFRC.6895.1	TR	P02786	TFRC	0.225868	0.0620251	0.29112
BCL2L11.17451.13	BIM	O43521	BCL2L11	0.225758	0.0621552	0.29112
PRSS37.5653.23	PRS37	A4D1T9	PRSS37	0.225758	0.0621552	0.29112
EDN1.6495.14	Endothelin 1	P05305	EDN1	0.225575	0.0623726	0.291778
DYNLT3.12867.40	DYLT3	P51808	DYNLT3	0.225429	0.062547	0.292107
NPPA.5443.62	ANP	P01160	NPPA	0.225137	0.062897	0.292613
HRK.8008.28	HRK	O00198	HRK	0.224881	0.0632045	0.29353
B4GALNT1.8976.13	B4GN1	Q00973	B4GALNT1	0.224772	0.0633366	0.29353
RGS5.16850.5	RGS5	O15539	RGS5	0.224662	0.063469	0.293863
COLEC12.5457.5	COLEC12	Q5KU26	COLEC12	0.224552	0.0636016	0.293915
IL1F10.17356.34	IL1FA	Q8WWZ1	IL1F10	0.2245	0.0636655	0.29393
KLRK1.14095.1	NKG2D	P26718	KLRK1	0.224443	0.0637344	0.293968
DNER.11442.1	DNER	Q8NFT8	DNER	0.22426	0.0639563	0.29443
RNASE6.5646.20	RNAS6	Q93091	RNASE6	0.22426	0.0639563	0.29443
COLGALT1.5638.23	GT251	Q8NBJ5	COLGALT1	0.223602	0.0647602	0.295881
RIPK2.8993.151	RIPK2	O43353	RIPK2	0.223493	0.064895	0.296144
PSMD7.3898.5	PSD7	P51665	PSMD7	0.223456	0.06494	0.296144
CERS5.13494.6	CERS5	Q8N5B7	CERS5	0.223091	0.0653911	0.297009
KIR3DL1.18907.97	KI3L1	P43629	KIR3DL1	0.223054	0.0654364	0.297009
ST8SIA6.6930.95	SIA8F	P61647	ST8SIA6	0.222908	0.0656177	0.297274
NTRK1.3477.63	TrkA	P04629	NTRK1	0.222287	0.0663925	0.299106
SOCS7.11657.86	SOCS7	O14512	SOCS7	0.221776	0.0670362	0.301445
BCL2A1.3413.50	BFL1	Q16548	BCL2A1	0.221593	0.0672673	0.302131
RAET1L.10589.7	RET1L	Q5VY80	RAET1L	0.221556	0.0673136	0.302131
VAMP7.19357.11	VAMP7	P51809	VAMP7	0.221374	0.0675454	0.302611
S100Z.18928.10	S100Z	Q8WXG8	S100Z	0.221191	0.0677779	0.303092
MUTYH.10030.8	MutY homolog	Q9UIF7	MUTYH	0.221081	0.0679177	0.303437
BSG.3585.54	BASI	P35613	BSG	0.220972	0.0680578	0.30364
ULBP1.3081.70	ULBP-1	Q9BZM6	ULBP1	0.220935	0.0681045	0.30364
FCRL4.8973.23	FCRL4	Q96PJ5	FCRL4	0.220899	0.0681513	0.30364
ORC6L.12389.4	ORC6	Q9Y5N6	ORC6L	0.220643	0.0684793	0.304541
FUT8.8244.16	FUT8	Q9BYC5	FUT8	0.220241	0.0689973	0.305722
MIA.2687.2	MIA	Q16674	MIA	0.219474	0.069995	0.309012
GFRA3.2505.49	GFRa-3	O60609	GFRA3	0.219109	0.0704742	0.309438
HIST3H2A.14144.3	H2A3	Q7L7L0	HIST3H2A	0.218999	0.0706184	0.309438
PKN1.12562.1	PKN1	Q16512	PKN1	0.218999	0.0706184	0.309438
POLE2.11562.9	DPOE2	P56282	POLE2	0.218962	0.0706666	0.309438
CD93.14136.234	C1QR1	Q9NPY3	CD93	0.218816	0.0708594	0.309871
FLRT3.9128.34	FLRT3	Q9NZU0	FLRT3	0.218743	0.070956	0.309871
ECEL1.7076.17	ECEL1	O95672	ECEL1	0.218707	0.0710043	0.309871
CCL20.2468.62	MIP-3a	P78556	CCL20	0.218634	0.071101	0.309871
TBK1.3400.49	TBK1	Q9UHD2	TBK1	0.218634	0.071101	0.309871
GLO1.9883.29	Glyoxalase I	Q04760	GLO1	0.218597	0.0711494	0.309871
C7orf73.8927.6	CG073	E0CX11	C7orf73	0.218305	0.0715376	0.310378
TMCO5A.6907.17	TMC5A	Q8N6Q1	TMCO5A	0.218195	0.0716836	0.310402
CYP3A4.2943.5	Cytochrome P450 3A4	P08684	CYP3A4	0.218159	0.0717323	0.310402
ASNA1.13620.10	ASNA	O43681	ASNA1	0.217976	0.0719763	0.310402
ROR1.2590.69	ROR1	Q01973	ROR1	0.217647	0.0724171	0.311358
NENF.9219.70	NENF	Q9UMX5	NENF	0.217464	0.072663	0.311358
TNS2.11667.29	TENC1	Q63HR2	TNS2	0.217428	0.0727122	0.311358
RPA2.19264.6	RFA2	P15927	RPA2	0.217209	0.0730083	0.312349
HIST3H2BB.18823.52	H2B3B	Q8N257	HIST3H2BB	0.216989	0.0733053	0.313067
GNAS.5757.45	GNAS3	O95467	GNAS	0.216916	0.0734046	0.313214
CD70.5807.77	CD70	P32970	CD70	0.216588	0.0738524	0.314571
SCAND1.17800.33	SCAND1	P57086	SCAND1	0.216332	0.0742022	0.315229
RBBP9.10064.12	RBBP9	O75884	RBBP9	0.216259	0.0743024	0.315378
PCYOX1L.5599.88	PCYXL	Q8NBM8	PCYOX1L	0.215966	0.0747043	0.316402
PLA2G10.2949.6	GX	O15496	PLA2G10	0.215893	0.074805	0.316402
MFRP.3685.53	MFRP	Q9BY79	MFRP	0.215638	0.0751584	0.31762
ATAD1.6625.31	ATAD1	Q8NBU5	ATAD1	0.215272	0.0756656	0.318954
PRIM1.13591.31	PRI1	P49642	PRIM1	0.215199	0.0757674	0.318954
HybControlElution.2229.54	HCE003183	HCE003183	HCE003183	0.215126	0.0758693	0.318954
TRAT1.7224.11	TRAT1	Q6PIZ9	TRAT1	0.215053	0.0759712	0.319106
HFE2.3332.57	RGM-C	Q6ZVN8	HFE2	0.214834	0.0762779	0.319839
SCARB2.5100.53	LIMP II	Q14108	SCARB2	0.214615	0.0765855	0.320511
RFNG.7203.125	RFNG	Q9Y644	RFNG	0.214578	0.0766368	0.320511
GABARAPL2.12494.99	GBRL2	P60520	GABARAPL2	0.213993	0.0774623	0.323467
ADAMTS1.3174.2	ATS1	Q9UHI8	ADAMTS1	0.213957	0.0775142	0.323467
GDF9.3067.67	GDF-9	O60383	GDF9	0.213738	0.0778257	0.323467
PIAS3.13513.174	PIAS3	Q9Y6X2	PIAS3	0.213738	0.0778257	0.323467
PLA2G7.5015.15	PAFAH	Q13093	PLA2G7	0.213738	0.0778257	0.323467
APCDD1.6599.5	APCD1	Q8J025	APCDD1	0.213445	0.0782427	0.323595
CLEC6A.6911.103	CLC6A	Q6EIG7	CLEC6A	0.213226	0.0785566	0.324159
MDM1.7898.29	MDM1	Q8TC05	MDM1	0.213226	0.0785566	0.324159
PSMB6.10530.8	PSB6	P28072	PSMB6	0.21319	0.078609	0.324159
RIC3.11228.37	RIC3	Q7Z5B4	RIC3	0.213117	0.0787139	0.324159
RPS27A.2846.24	Ubiquitin+1	P62979	RPS27A	0.213117	0.0787139	0.324159
C19orf80.7183.102	TD26	Q6UXH0	C19orf80	0.212934	0.0789766	0.324965
IL1B.3037.62	IL-1b	P01584	IL1B	0.212751	0.0792401	0.325477
MSRB2.16877.19	MSRB2	Q9Y3D2	MSRB2	0.212751	0.0792401	0.325477
DEFB103A.5679.16	HBD-3	P81534	DEFB103A	0.212569	0.0795042	0.325477
REG3G.15476.6	REG3G	Q6UW15	REG3G	0.212569	0.0795042	0.325477
LGALS13.19147.6	PP13	Q9UHV8	LGALS13	0.21213	0.0801411	0.326199
CRIM1.8699.43	CRIM1	Q9NZV1	CRIM1	0.212094	0.0801943	0.326199
CCL17.3519.3	TARC	Q92583	CCL17	0.211984	0.0803542	0.326199
SCARF2.8956.96	SREC-II	Q96GP6	SCARF2	0.211765	0.0806748	0.326952
EPHA4.16288.17	EPHA4	P54764	EPHA4	0.211509	0.0810501	0.327868
DKK1.3535.84	DKK1	O94907	DKK1	0.211472	0.0811039	0.327868
PCOLCE.11237.49	PCOC1	Q15113	PCOLCE	0.211399	0.0812114	0.328029
ARL9.18416.3	ARL9	Q6T311	ARL9	0.210888	0.0819674	0.330531
APP.3171.57	amyloid precursor protein	P05067	APP	0.210742	0.0821844	0.331131
TUFT1.5690.49	TUFT1	Q9NNX1	TUFT1	0.210011	0.0832763	0.33414
MBD4.3891.56	MBD4	O95243	MBD4	0.209865	0.083496	0.334744
SEC61B.7878.2	SC61B	P60468	SEC61B	0.209792	0.0836061	0.334852
BCL2.3412.7	Bcl-2	P10415	BCL2	0.209755	0.0836611	0.334852
BDH2.17329.2	BDH2	Q9BUT1	BDH2	0.209353	0.0842688	0.336671
PPP3R1.15545.13	Calcineurin B a	P63098	PPP3R1	0.209317	0.0843242	0.336671
GFAP.3034.1	GFAP	P14136	GFAP	0.209244	0.0844351	0.336836
MPG.12438.127	3MG	P29372	MPG	0.209134	0.0846017	0.337223
FGF23.3807.1	FGF23	Q9GZV9	FGF23	0.209061	0.0847129	0.337389
ADAMTS6.6441.62	ATS6	Q9UKP5	ADAMTS6	0.208842	0.0850472	0.338164
TCP1.19265.9	TCPA	P17987	TCP1	0.208842	0.0850472	0.338164
TNFRSF10B.5534.49	TRAIL R2	O14763	TNFRSF10B	0.208769	0.0851588	0.338274
PAEP.8867.18	Glycodelin	P09466	PAEP	0.208586	0.0854385	0.338553
MLL2.13623.4	MLL2	O14686	MLL2	0.208476	0.0856066	0.338611
MGAT4C.7208.60	MGT4C	Q9UBM8	MGAT4C	0.208403	0.0857189	0.338611
CLPP.17196.5	ClpP endopeptidase	Q16740	CLPP	0.208148	0.0861126	0.339612
KLF4.17850.42	KLF4	O43474	KLF4	0.207782	0.0866776	0.341562
CD3G.7924.7	CD3G	P09693	CD3G	0.20749	0.0871317	0.342963
COMMD1.12509.115	COMD1	Q8N668	COMMD1	0.207453	0.0871886	0.342963
TP63.10040.63	P73L	Q9H3D4	TP63	0.207161	0.0876448	0.343417
SYT11.7089.42	SYT11	Q9BT88	SYT11	0.206905	0.0880456	0.34443
PTS.12014.19	PTPS	Q03393	PTS	0.206211	0.0891405	0.347032
MAMDC2.6119.14	MAMC2	Q7Z304	MAMDC2	0.205992	0.0894885	0.347827
RIPPLY1.9767.22	RIPP1	Q0D2K3	RIPPLY1	0.205773	0.0898376	0.348624
AMY2B.15556.49	Alpha-amylase 2B	P19961	AMY2B	0.205627	0.0900709	0.34925
NET1.14260.112	ARHG8	Q7Z628	NET1	0.205334	0.0905389	0.35045
NETO1.5639.49	NETO1	Q8TDF5	NETO1	0.205115	0.0908912	0.351025
TNFRSF6B.5070.76	DcR3	O95407	TNFRSF6B	0.205005	0.0910677	0.351427
HSP90B1.6393.63	Endoplasmin	P14625	HSP90B1	0.204896	0.0912445	0.351829
IL36B.14149.9	IL-1F8	Q9NZH7	IL36B	0.204677	0.091599	0.352829
CTSG.2431.17	Cathepsin G	P08311	CTSG	0.204567	0.0917766	0.352829
FABP12.18888.37	FBP12	A6NFH5	FABP12	0.204531	0.0918358	0.352829
RAB39B.12403.30	RB39B	Q96DA2	RAB39B	0.204457	0.0919545	0.352829
YME1L1.11190.129	YMEL1	Q96TA2	YME1L1	0.204421	0.0920138	0.352829
MRAP.7895.108	MRAP	Q8TCY5	MRAP	0.204348	0.0921326	0.353005
STC2.6231.46	STC2	O76061	STC2	0.204019	0.0926688	0.354778
BTNL8.9026.40	BTNL8	Q6UX41	BTNL8	0.203873	0.0929078	0.355361
ST8SIA2.7920.30	SIA8B	Q92186	ST8SIA2	0.203836	0.0929677	0.355361
DHX8.11601.26	DHX8	Q14562	DHX8	0.20369	0.0932073	0.355664
PSMD10.18385.4	PSD10	O75832	PSMD10	0.203654	0.0932673	0.355664
HNF1A.11193.27	HNF1A	P20823	HNF1A	0.202996	0.0943523	0.358088
PSMB2.19252.67	PSB2	P49721	PSMB2	0.202923	0.0944735	0.358088
SOD3.5660.51	SOD3	P08294	SOD3	0.202923	0.0944735	0.358088
CTSF.9212.22	CATF	Q9UBX1	CTSF	0.202886	0.0945341	0.358088
WSCD2.6274.15	WSCD2	Q2TBF2	WSCD2	0.20285	0.0945948	0.358088
CER1.6230.56	CER1	O95813	CER1	0.202777	0.0947162	0.358088
CARTPT.5743.82	CART	Q16568	CARTPT	0.202375	0.0953861	0.359498
F13B.5658.64	coagulation factor XIII B	P05160	F13B	0.201936	0.0961212	0.361937
CRIP2.9053.16	CRIP2	P52943	CRIP2	0.2019	0.0961827	0.361937
FAXDC2.9074.6	CE004	Q96IV6	FAXDC2	0.201608	0.0966754	0.362797
ANGPTL3.10391.1	ANGL3	Q9Y5C1	ANGPTL3	0.201535	0.0967989	0.362797
ATG3.18156.7	ATG3	Q9NT62	ATG3	0.201425	0.0969844	0.362882
IGSF9B.9060.27	TUTLB	Q9UPX0	IGSF9B	0.201352	0.0971082	0.362882
FGFR3.3809.1	FGFR-3	P22607	FGFR3	0.200913	0.0978536	0.365336
PAK6.3827.22	PAK6	Q9NQU5	PAK6	0.200658	0.0982905	0.366452
OLFM1.5703.26	NOE1	Q99784	OLFM1	0.200329	0.0988544	0.367656
ASAP2.13518.5	ASAP2	O43150	ASAP2	0.20011	0.0992318	0.368164
RTF1.7741.111	RTF1	Q92541	RTF1	0.200073	0.0992948	0.368164
GZMM.5704.74	Granzyme M	P51124	GZMM	0.200037	0.0993578	0.368164
ICAM2.5486.73	sICAM-2	P13598	ICAM2	0.199927	0.0995471	0.368583
MMP16.9719.145	MMP-16	P51512	MMP16	0.199817	0.0997367	0.369003
PRKCSH.5687.5	GLU2B	P14314	PRKCSH	0.199452	0.100371	0.370638
MRAS.18297.8	RASM	O14807	MRAS	0.199415	0.100434	0.370638
C11orf73.8686.342	HIKES	Q53FT3	C11orf73	0.199342	0.100561	0.370638
PES1.4267.81	PESC	O00541	PES1	0.199342	0.100561	0.370638
ASGR2.9474.22	ASGR2	P07307	ASGR2	0.199269	0.100689	0.370638
CCNA1.15319.226	CCNA1	P78396	CCNA1	0.199233	0.100752	0.370638
C1orf43.6937.251	CA043	Q9BWL3	C1orf43	0.19916	0.10088	0.370638
FCRL4.8991.115	FCRL4	Q96PJ5	FCRL4	0.19916	0.10088	0.370638
ABL2.5261.13	ABL2	P42684	ABL2	0.198831	0.101455	0.371671
MPZL1.16845.15	MPZL1	O95297	MPZL1	0.198648	0.101776	0.372564
IGSF8.6984.6	IGSF8	Q969P0	IGSF8	0.198539	0.101969	0.372896
IDE.3197.70	IDE	P14735	IDE	0.198465	0.102098	0.372896
SUMO2.19555.1	SUMO2	P61956	SUMO2	0.19821	0.102549	0.373981
PBRM1.12518.289	PB1	Q86U86	PBRM1	0.1981	0.102743	0.37408
BOC.4328.2	BOC	Q9BWV1	BOC	0.198064	0.102808	0.37408
FSTL3.3438.10	FSTL3	O95633	FSTL3	0.197954	0.103003	0.37418
TMCC3.8922.4	TMCC3	Q9ULS5	TMCC3	0.197917	0.103067	0.37418
EFHD1.19616.100	EFHD1	Q9BUP0	EFHD1	0.197516	0.103783	0.375651
PI3.4982.54	Elafin	P19957	PI3	0.197333	0.10411	0.375666
RNF215.7758.217	RN215	Q9Y6U7	RNF215	0.197333	0.10411	0.375666
IGSF11.10700.10	IGS11	Q5DX21	IGSF11	0.197296	0.104175	0.375666
IDI1.17712.7	IDI1	Q13907	IDI1	0.196675	0.105292	0.377724
OTUB2.12493.42	OTUB2	Q96DC9	OTUB2	0.196602	0.105424	0.377917
GDNF.5822.22	GDNF	P39905	GDNF	0.196493	0.105622	0.378348
DPYSL3.12707.26	DPYL3	Q14195	DPYSL3	0.19631	0.105953	0.379253
LRRC52.10785.8	LRC52	Q8N7C0	LRRC52	0.196237	0.106085	0.379405
PDGFD.17140.57	PDGFD	Q9GZP0	PDGFD	0.195835	0.106817	0.381501
BLNK.19225.11	BLNK	Q8WV28	BLNK	0.195177	0.108023	0.38439
SMPDL3A.4771.10	ASM3A	Q92484	SMPDL3A	0.194995	0.10836	0.385051
IL17A.9170.24	IL-17	Q16552	IL17A	0.194885	0.108562	0.385051
LMNB1.3889.64	Lamin-B1	P20700	LMNB1	0.194848	0.10863	0.385051
CAMP.9384.17	Cathelicidin peptide	P49913	CAMP	0.194666	0.108968	0.385488
GALNT10.7003.4	GLT10	Q86SR1	GALNT10	0.194264	0.109715	0.387282
POMC.4890.10	ACTH	P01189	POMC	0.194154	0.10992	0.387439
DEFB116.11144.10	DB116	Q30KQ4	DEFB116	0.193972	0.110261	0.388036
QSOX2.8397.147	QSOX2	Q6ZRP7	QSOX2	0.193387	0.111359	0.390641
OBP2A.6526.77	OBP2A	Q9NY56	OBP2A	0.193314	0.111497	0.390641
GSTM1.15395.15	GST M1-1	P09488	GSTM1	0.192985	0.112119	0.390922
REG1B.16770.3	REG1B	P48304	REG1B	0.192839	0.112396	0.391245
AMY2A.18917.53	Pancreatic alpha-amylase	P04746	AMY2A	0.192802	0.112465	0.391245
EFNB3.2514.65	Ephrin-B3	Q15768	EFNB3	0.192547	0.112952	0.391417
ANAPC7.11690.47	APC7	Q9UJX3	ANAPC7	0.191999	0.114	0.392956
SPACA1.6228.58	sperm acrosome associated 1	Q9HBV2	SPACA1	0.191743	0.114492	0.39409
NR1H4.8946.38	NR1H4	Q96RI1	NR1H4	0.19167	0.114633	0.394294
ASIC4.6951.26	ASIC4	Q96FT7	ASIC4	0.19072	0.116475	0.39805
CALCOCO2.12534.10	CACO2	Q13137	CALCOCO2	0.19072	0.116475	0.39805
IL4.2906.55	IL-4	P05112	IL4	0.19061	0.116689	0.398147
ANAPC10.12345.4	APC10	Q9UM13	ANAPC10	0.190537	0.116832	0.398147
CINP.19383.131	CINP	Q9BW66	CINP	0.190354	0.11719	0.398561
TAX1BP1.12721.4	TAXB1	Q86VP1	TAX1BP1	0.190281	0.117333	0.398732
DNAJC11.9783.75	DJC11	Q9NVH1	DNAJC11	0.190245	0.117405	0.398732
OMD.5358.3	OMD	Q99983	OMD	0.189879	0.118124	0.400332
TOM1L1.13652.2	TM1L1	O75674	TOM1L1	0.189879	0.118124	0.400332
NMU.8754.5	NMU	P48645	NMU	0.189697	0.118485	0.401239
SNAI2.10014.31	SLUG	O43623	SNAI2	0.18966	0.118557	0.401239
RBP4.15633.6	RBP	P02753	RBP4	0.189039	0.119791	0.402742
ATP1B4.9933.49	AT1B4	Q9UN42	ATP1B4	0.189003	0.119864	0.402742
PF4.2697.7	PF-4	P02776	PF4	0.188966	0.119937	0.402742
PROK2.10754.113	Prokineticin-2	Q9HC23	PROK2	0.188966	0.119937	0.402742
TERF1.10049.112	TERF1	P54274	TERF1	0.188893	0.120082	0.402742
EFCAB14.10830.5	K0494	O75071	EFCAB14	0.188783	0.120302	0.403198
TYMS.5035.7	TS	P04818	TYMS	0.18871	0.120448	0.403409
ALDH1A3.9835.16	AL1A3	P47895	ALDH1A3	0.188418	0.121034	0.403976
PPBP.16765.52	PBP	P02775	PPBP	0.188345	0.121181	0.404188
GIP.16292.288	GIP	P09681	GIP	0.188272	0.121328	0.4044
C17orf67.9070.1	CQ067	Q0P5P2	C17orf67	0.187906	0.122066	0.406019
CD46.17682.1	CD46	P15529	CD46	0.187906	0.122066	0.406019
KAT2B.12368.18	PCAF	Q92831	KAT2B	0.187578	0.122732	0.407397
KPNA4.12698.72	IMA4	O00629	KPNA4	0.187578	0.122732	0.407397
KEL.7070.25	KELL	P23276	KEL	0.187322	0.123253	0.408338
ESRP1.8828.21	ESRP1	Q6NXG1	ESRP1	0.187249	0.123402	0.408338
PCDHGA10.6321.65	PCDGA	Q9Y5H3	PCDHGA10	0.187176	0.123551	0.408338
GDF10.16749.79	BMP-3b	P55107	GDF10	0.187139	0.123625	0.408338
PFN2.16923.20	Profilin II	P35080	PFN2	0.186628	0.124673	0.410744
BIRC7.15504.39	Livin B	Q96CA5	BIRC7	0.186226	0.125502	0.413159
AGT.3484.60	Angiotensinogen	P01019	AGT	0.186189	0.125577	0.413159
GALNT3.6593.5	GALT3	Q14435	GALNT3	0.186116	0.125728	0.413344
APOC1.15364.101	Apo C-I	P02654	APOC1	0.18608	0.125804	0.413344
GSTM3.9748.31	GSTM3-3	P21266	GSTM3	0.185934	0.126107	0.414058
SIT1.11194.6	SIT1	Q9Y3P8	SIT1	0.18586	0.126258	0.414275
ELANE.13671.40	Elastase	P08246	ELANE	0.185751	0.126486	0.41446
PAPLN.11254.13	PPN	O95428	PAPLN	0.185751	0.126486	0.41446
SIAE.9263.57	SIAE	Q9HAT2	SIAE	0.185605	0.12679	0.414895
VIM.15540.6	Vimentin	P08670	VIM	0.185385	0.127247	0.415829
GM2A.15441.6	SAP3	P17900	GM2A	0.185312	0.1274	0.416047
BMPR2.4862.63	BMP RII	Q13873	BMPR2	0.185239	0.127553	0.416265
PLA1A.9518.95	PLA1A	Q53H76	PLA1A	0.184874	0.128319	0.417639
CD200R1L.8980.19	MO2R2	Q6Q8B3	CD200R1L	0.184801	0.128472	0.417859
BIRC7.15412.40	KIAP	Q96CA5	BIRC7	0.184691	0.128703	0.418017
ARF1.19239.5	ARF1	P84077	ARF1	0.184289	0.129552	0.419678
HAVCR2.5134.52	TIMD3	Q8TDQ0	HAVCR2	0.18418	0.129784	0.420149
HMGN1.9187.2	HMGN1	P05114	HMGN1	0.18407	0.130016	0.42034
CYGB.11546.7	CYGB	Q8WWM9	CYGB	0.183997	0.130171	0.420561
KIAA2013.6538.90	K2013	Q8IYS2	KIAA2013	0.183559	0.131105	0.422702
CD2.7100.31	CD2	P06729	CD2	0.183522	0.131183	0.422702
LYVE1.3206.4	LYVE1	Q9Y5Y7	LYVE1	0.183339	0.131574	0.42368
GPR101.11371.1	GP101	Q96P66	GPR101	0.183047	0.132201	0.425416
B4GALT3.6921.24	B4GT3	O60512	B4GALT3	0.182718	0.13291	0.427128
HIST2H2BE.14143.8	H2B2E	Q16778	HIST2H2BE	0.182609	0.133146	0.427486
PVRL1.8803.61	nectin-1 gamma	Q15223	PVRL1	0.182499	0.133383	0.427486
DEFB118.9306.7	DB118	Q96PH6	DEFB118	0.182463	0.133462	0.427486
LGALS2.3033.57	Galectin-2	P05162	LGALS2	0.182353	0.1337	0.427681
BAG4.12844.10	BAG4	O95429	BAG4	0.18228	0.133858	0.427905
HOGA1.10024.44	HOGA1	Q86XE5	HOGA1	0.18217	0.134096	0.428101
SPARC.3043.49	ON	P09486	SPARC	0.18217	0.134096	0.428101
BMX.3414.40	BMX	P51813	BMX	0.182024	0.134414	0.42855
MED1.3892.21	MED-1	Q15648	MED1	0.181951	0.134573	0.428775
SPSB1.13942.140	SPSB1	Q96BD6	SPSB1	0.181805	0.134892	0.429508
LMOD1.12504.26	LMOD1	P29536	LMOD1	0.181659	0.135211	0.430242
GH1.8462.18	HGH	P01241	GH1	0.18144	0.135691	0.430637
PRC1.15310.61	PRC1	O43663	PRC1	0.18144	0.135691	0.430637
TP53I13.6400.33	P5I13	Q8NBR0	TP53I13	0.18144	0.135691	0.430637
CMPK1.18243.9	Cytidylate kinase	P30085	CMPK1	0.18133	0.135932	0.431034
DEFB107A.6399.52	D107A	Q8IZN7	DEFB107A	0.181074	0.136494	0.43177
IGFBP5.19581.15	IGFBP-5	P24593	IGFBP5	0.180891	0.136897	0.432761
HMGB1.2524.56	HMG-1	P09429	HMGB1	0.180672	0.137381	0.433982
IFNA6.5714.88	IFNA6	P05013	IFNA6	0.180636	0.137462	0.433982
CST5.3803.10	CYTD	P28325	CST5	0.180343	0.13811	0.43546
PEX5.5915.58	PEX5	P50542	PEX5	0.179795	0.139332	0.438456
PATE1.8386.11	PATE	Q8WXA2	PATE1	0.179357	0.140315	0.440405
EIF4G3.13991.47	IF4G3	O43432	EIF4G3	0.178919	0.141303	0.442933
CASP2.4904.7	Caspase-2	P42575	CASP2	0.178772	0.141634	0.44334
MAPKAPK5.3821.28	MAPK5	Q8IW41	MAPKAPK5	0.178772	0.141634	0.44334
EGFL6.17454.15	EGFL6	Q8IUX8	EGFL6	0.178736	0.141716	0.44334
KCNE5.8756.41	KCE1L	Q9UJ90	KCNE5	0.178517	0.142214	0.443981
COL9A1.6631.17	CO9A1	P20849	COL9A1	0.178407	0.142463	0.443981
NUDT1.19206.20	8ODP	P36639	NUDT1	0.177822	0.143797	0.446988
SH2D3C.12704.26	SH2D3	Q8N5H7	SH2D3C	0.177311	0.144972	0.449486
SMIM13.13452.113	SIM13	P0DJ93	SMIM13	0.177201	0.145224	0.449955
SERPINI2.7117.21	SPI2	O75830	SERPINI2	0.177165	0.145309	0.449955
PDGFA.4499.21	PDGF-AA	P04085	PDGFA	0.176726	0.146323	0.450715
HMOX2.2622.18	HO-2	P30519	HMOX2	0.176653	0.146493	0.450715
THSD7A.9600.55	THS7A	Q9UPZ6	THSD7A	0.176251	0.147428	0.451465
EDC4.13066.42	EDC4	Q6P2E9	EDC4	0.176105	0.14777	0.451465
PDZK1.16852.10	NHRF3	Q5T2W1	PDZK1	0.176105	0.14777	0.451465
SFTPB.10672.75	SP-B	P07988	SFTPB	0.176069	0.147855	0.451465
NOP16.18228.30	NOP16	Q9Y3C1	NOP16	0.176032	0.14794	0.451465
SERPIND1.3316.58	Heparin cofactor II	P05546	SERPIND1	0.176032	0.14794	0.451465
TBX22.11146.4	TBX22	Q9Y458	TBX22	0.175849	0.148368	0.452201
FOXC2.14051.54	FOXC2	Q99958	FOXC2	0.17563	0.148883	0.45346
CAMP.15481.45	LL-37	P49913	CAMP	0.175411	0.149399	0.454484
N6AMT1.11096.57	HEMK2	Q9Y5N5	N6AMT1	0.175265	0.149743	0.454652
KLRC4.10552.88	NKG2F	O43908	KLRC4	0.175228	0.14983	0.454652
LHB.8376.25	LSHB	P01229	LHB	0.175228	0.14983	0.454652
NTN1.6649.51	NET1	O95631	NTN1	0.175119	0.150089	0.454823
PRNP.6545.58	PRIO	P04156	PRNP	0.175082	0.150175	0.454823
TACSTD2.14034.22	GA733-1 protein	P09758	TACSTD2	0.175082	0.150175	0.454823
LUM.13114.50	Lumican	P51884	LUM	0.174753	0.150954	0.455475
IL26.16760.2	IL-26	Q9NPH9	IL26	0.174425	0.151737	0.457003
RNF41.13411.21	RNF41	Q9H4P4	RNF41	0.174059	0.15261	0.458491
RAG1.11311.79	RAG-1	P15918	RAG1	0.17384	0.153135	0.4595
RNGTT.12847.27	MCE1	O60942	RNGTT	0.173657	0.153574	0.460247
RPS3A.5484.63	RS3A	P61247	RPS3A	0.173657	0.153574	0.460247
CRLF2.13694.24	TSLP R	Q9HC73	CRLF2	0.173548	0.153838	0.460731
SPRED1.8318.13	SPRE1	Q7Z699	SPRED1	0.173036	0.155073	0.46355
AP1S2.18405.117	AP1S2	P56377	AP1S2	0.173	0.155162	0.46355
SELE.3470.1	sE-Selectin	P16581	SELE	0.172963	0.15525	0.46355
PXDN.13463.1	PXDN	Q92626	PXDN	0.172744	0.155783	0.46428
SAT1.9859.180	SSAT-1	P21673	SAT1	0.172744	0.155783	0.46428
RNASE10.5602.62	RNS10	Q5GAN6	RNASE10	0.172488	0.156405	0.464665
SPACA5.6494.60	sperm acrosome associated 5	Q96QH8	SPACA5	0.172452	0.156494	0.464665
TBXAS1.8098.37	THAS	P24557	TBXAS1	0.172452	0.156494	0.464665
ATG4B.13629.25	ATG4B	Q9Y4P1	ATG4B	0.172415	0.156583	0.464665
NR1D1.5236.2	NR1D1	P20393	NR1D1	0.171867	0.157925	0.467215
HHLA2.14132.21	HHLA2	Q9UM44	HHLA2	0.171611	0.158554	0.467932
ZNF18.11372.2	ZNF18	P17022	ZNF18	0.171502	0.158824	0.468386
OLFM4.4769.10	Olfactomedin-4	Q6UX06	OLFM4	0.171392	0.159094	0.468386
BAI3.15365.41	BAI3	O60242	BAI3	0.171173	0.159636	0.469696
RGS21.19381.7	RGS21	Q2M5E4	RGS21	0.1711	0.159817	0.469905
HSD17B8.19491.11	DHB8	Q92506	HSD17B8	0.171027	0.159998	0.469905
FBLN1.6470.19	fibulin 1	P23142	FBLN1	0.170807	0.160543	0.470628
MRPL52.7123.25	RM52	Q86TS9	MRPL52	0.170771	0.160634	0.470628
HPSE.5604.30	HPSE	Q9Y251	HPSE	0.170661	0.160906	0.470821
ITGB6.7737.76	ITB6	P18564	ITGB6	0.170588	0.161088	0.470821
KLB.19557.3	KLOTB	Q86Z14	KLB	0.170442	0.161453	0.471602
ACRV1.15301.24	sperm protein 10	P26436	ACRV1	0.170369	0.161635	0.47185
GABBR1.11279.42	GABR1	Q9UBS5	GABBR1	0.170077	0.162367	0.473646
KRT19.15606.19	Keratin 19	P08727	KRT19	0.169967	0.162641	0.473646
SKP1.3902.21	SKP1	P63208	SKP1	0.169967	0.162641	0.473646
THBS3.8982.65	TSP3	P49746	THBS3	0.169894	0.162825	0.473895
MAN1C1.13427.66	MA1C1	Q9NR34	MAN1C1	0.169529	0.163745	0.475679
BATF.19227.18	BATF	Q16520	BATF	0.169492	0.163837	0.475679
BPTF.12482.5	BPTF	Q12830	BPTF	0.169383	0.164113	0.475912
P4HA2.11348.132	P4HA2	O15460	P4HA2	0.169236	0.164483	0.47643
ARL1.12392.30	ARL1	P40616	ARL1	0.168761	0.165688	0.478473
TGFB2.4156.74	TGF-b2	P61812	TGFB2	0.168725	0.165781	0.478473
TAGLN2.9201.13	Transgelin-2	P37802	TAGLN2	0.168652	0.165967	0.478725
LRRK2.10990.21	LRRK2	Q5S007	LRRK2	0.168469	0.166433	0.479163
TYMSOS.8263.64	CR056	Q8TAI1	TYMSOS	0.168396	0.16662	0.479163
ANXA8.18290.6	Annexin A8	P13928	ANXA8	0.16814	0.167274	0.479844
TMEM52.11186.12	TMM52	Q8NDY8	TMEM52	0.16814	0.167274	0.479844
MFAP1.5606.24	MFAP1	P55081	MFAP1	0.167994	0.167649	0.479844
BMP4.6326.20	BMP-4	P12644	BMP4	0.167958	0.167742	0.479844
DMKN.5963.9	Dermokine	Q6E0U4	DMKN	0.167885	0.16793	0.480097
CASQ2.19291.2	CASQ2	O14958	CASQ2	0.167775	0.168212	0.480321
FABP6.6450.8	FABP6	P51161	FABP6	0.167738	0.168306	0.480321
UROS.11248.43	HEM4	P10746	UROS	0.167738	0.168306	0.480321
PCSK2.15440.57	NEC2	P16519	PCSK2	0.167665	0.168494	0.480489
DEFB112.5689.1	DB112	Q30KQ8	DEFB112	0.167556	0.168776	0.480489
MMP17.2838.53	MMP-17	Q9ULZ9	MMP17	0.167154	0.169815	0.482072
GDA.12667.2	GUAD	Q9Y2T3	GDA	0.167081	0.170005	0.482299
AQP4.11363.58	AQP4	P55087	AQP4	0.167044	0.170099	0.482299
PNMT.17204.17	PNMT	P11086	PNMT	0.166862	0.170574	0.483079
DMBT1.19212.4	DMBT1	Q9UGM3	DMBT1	0.166606	0.171239	0.484358
HMGCS2.13704.5	HMCS2	P54868	HMGCS2	0.166569	0.171334	0.484358
PEX26.19366.8	PEX26	Q7Z412	PEX26	0.16646	0.17162	0.484358
APBB2.12753.6	APBB2	Q92870	APBB2	0.16624	0.172193	0.485396
WFDC13.9345.436	WFD13	Q8IUB5	WFDC13	0.16624	0.172193	0.485396
PLA2G16.7865.126	HRSL3	P53816	PLA2G16	0.166204	0.172289	0.485396
HMGCR.5230.99	HMGR	P04035	HMGCR	0.165839	0.173248	0.487529
PRSS1.3049.61	Trypsin	P07477	PRSS1	0.165619	0.173824	0.488869
GH2.10978.39	SOM2	P01242	GH2	0.165473	0.17421	0.489604
CELF2.7245.2	CELF2	O95319	CELF2	0.1654	0.174403	0.489604
EQTN.11162.37	EQTN	Q9NQ60	EQTN	0.165364	0.174499	0.489604
KIR2DS2.10428.1	KI2S2	P43631	KIR2DS2	0.164779	0.176049	0.492267
SH3GLB1.16859.100	SHLB1	Q9Y371	SH3GLB1	0.164377	0.17712	0.494666
ATP4B.9994.217	ATP4B	P51164	ATP4B	0.164158	0.177707	0.494775
KAZALD1.7144.234	KAZD1	Q96I82	KAZALD1	0.163866	0.178491	0.494775
ZNF75D.11596.47	ZN75D	P51815	ZNF75D	0.163866	0.178491	0.494775
UBE2G1.17158.17	UB2G1	P62253	UBE2G1	0.163829	0.178589	0.494775
ALDOA.5864.10	aldolase A	P04075	ALDOA	0.163792	0.178687	0.494775
GNRH2.10708.3	GON2	O43555	GNRH2	0.163792	0.178687	0.494775
CFI.2567.5	Factor I	P05156	CFI	0.163537	0.179376	0.496126
CLCA1.10496.11	CaCC	A8K7I4	CLCA1	0.163427	0.179671	0.49666
MMP7.2789.26	MMP-7	P09237	MMP7	0.163025	0.180759	0.498811
PRL.2585.2	PRL	P01236	PRL	0.162769	0.181453	0.500146
TRAF4.13041.47	TRAF4	Q9BUZ4	TRAF4	0.162733	0.181552	0.500146
SERPINA6.4785.30	CBG	P08185	SERPINA6	0.16266	0.181751	0.50041
GFRAL.6920.1	GFRAL	Q6UXV0	GFRAL	0.162368	0.182548	0.502033
MYCT1.13541.1	MYCT1	Q8N699	MYCT1	0.162075	0.183347	0.503088
ARHGAP30.12807.89	RHG30	Q7Z6I6	ARHGAP30	0.161929	0.183748	0.503882
ZFYVE27.9102.28	ZFY27	Q5T4F4	ZFYVE27	0.161893	0.183848	0.503882
CFC1.3294.55	CFC1	P0CG37	CFC1	0.161308	0.185458	0.506298
SUSD1.9582.93	SUSD1	Q6UWL2	SUSD1	0.161235	0.18566	0.506563
PIGR.3216.2	PIGR	P01833	PIGR	0.161089	0.186064	0.507085
PSMA7.12460.18	PSA7	O14818	PSMA7	0.161052	0.186165	0.507085
BCCIP.18304.19	BCCIP	Q9P287	BCCIP	0.16087	0.186672	0.507894
GAD1.11280.6	DCE1	Q99259	GAD1	0.160248	0.188401	0.51085
ALPP.7813.6	Alkaline phosphatase, placental	P05187	ALPP	0.160175	0.188605	0.51085
SLTM.8320.5	SLTM	Q9NWH9	SLTM	0.160175	0.188605	0.51085
DEFB125.9486.13	DB125	Q8N687	DEFB125	0.160066	0.188912	0.511117
CCNA2.15574.37	Cyclin A	P20248	CCNA2	0.15992	0.189321	0.511653
ARL5A.18414.26	ARL5A	Q9Y689	ARL5A	0.159737	0.189834	0.511888
YWHAH.4707.50	14-3-3 eta	Q04917	YWHAH	0.159591	0.190245	0.512433
NXPH3.6054.6	NXPH3	O95157	NXPH3	0.159372	0.190862	0.512948
ADPRH.18395.5	ADPRH	P54922	ADPRH	0.158531	0.193242	0.518186
TRDMT1.12635.9	TRDMT	O14717	TRDMT1	0.158495	0.193346	0.518186
BMP10.3587.53	BMP10	O95393	BMP10	0.158275	0.193971	0.519293
CDON.4541.49	CDON	Q4KMG0	CDON	0.157874	0.19512	0.521784
COX7A2L.9590.10	COX7R	O14548	COX7A2L	0.157727	0.195539	0.522336
CHST5.7020.13	CHST5	Q9GZS9	CHST5	0.157508	0.196169	0.523713
CCT7.13673.21	TCPH	Q99832	CCT7	0.157435	0.196379	0.523713
ARL6.18415.16	ARL6	Q9H0F7	ARL6	0.157326	0.196695	0.523978
TXN.8813.160	Thioredoxin	P10599	TXN	0.157326	0.196695	0.523978
BTN2A1.8869.5	BT2A1	Q7KYR7	BTN2A1	0.15707	0.197433	0.524789
TPM1.5033.27	Tropomyosin 1 alpha chain	P09493	TPM1	0.15707	0.197433	0.524789
CR1.19556.12	Complement receptor type 1	P17927	CR1	0.156704	0.19849	0.526437
HTR2A.13556.28	5HT2A	P28223	HTR2A	0.156485	0.199127	0.527252
SPOCK1.5490.53	Testican-1	Q08629	SPOCK1	0.156449	0.199233	0.527252
GRAMD1C.8336.267	GRM1C	Q8IYS0	GRAMD1C	0.156229	0.199871	0.527795
PRKAR2A.19125.26	KAP2	P13861	PRKAR2A	0.156083	0.200297	0.528338
RAB2B.19253.82	RAB2B	Q8WUD1	RAB2B	0.156083	0.200297	0.528338
CST3.2609.59	Cystatin C	P01034	CST3	0.156047	0.200404	0.528338
FCGR2B.3310.62	FCG2B	P31994	FCGR2B	0.155937	0.200724	0.528894
CST8.10572.65	CST8	O60676	CST8	0.155645	0.20158	0.530566
FCGR3B.3311.27	FCG3B	O75015	FCGR3B	0.155426	0.202224	0.530801
IL15RA.3445.53	IL-15 Ra	Q13261	IL15RA	0.155426	0.202224	0.530801
SSR1.8106.15	SSRA	P43307	SSR1	0.155353	0.202438	0.530801
ENSA.17734.13	a-endosulfine	O43768	ENSA	0.15528	0.202653	0.530801
RAMP3.15437.11	RAMP3	O60896	RAMP3	0.155206	0.202869	0.531077
MVK.11391.69	MVK	Q03426	MVK	0.154476	0.205029	0.534993
POLD4.19159.9	DNA polymerase subunit delta 4	Q9HCU8	POLD4	0.153928	0.20666	0.538095
OBP2B.5680.54	OBP2B	Q9NPH6	OBP2B	0.153599	0.207644	0.540074
NRG3.10981.56	NRG3	P56975	NRG3	0.153416	0.208191	0.541208
THSD7A.11174.8	THS7A	Q9UPZ6	THSD7A	0.15327	0.20863	0.542036
OSMR.10892.8	OSMR	Q99650	OSMR	0.153124	0.209069	0.542036
ENPP6.15579.26	ENPP6	Q6UWR7	ENPP6	0.152978	0.20951	0.542887
CLC.11094.104	LPPL	Q05315	CLC	0.152612	0.210613	0.544842
KIAA1324.9097.5	K1324	Q6UXG2	KIAA1324	0.152539	0.210834	0.544842
PDGFB.4149.8	PDGF-BB	P01127	PDGFB	0.152393	0.211277	0.544842
C4BPA.9449.150	C4b-binding protein alpha chain	P04003	C4BPA	0.152284	0.211609	0.545119
PTTG1.17727.1	Securin	O95997	PTTG1	0.152284	0.211609	0.545119
CRHBP.6039.24	CRHBP	P24387	CRHBP	0.152174	0.211942	0.545392
NDRG3.18312.68	NDRG3	Q9UGV2	NDRG3	0.151918	0.21272	0.546817
C18orf32.8236.8	CR032	Q8TCD1	C18orf32	0.151845	0.212943	0.547099
CAV3.8690.25	CAV3	P56539	CAV3	0.151735	0.213277	0.547664
HS3ST4.19370.30	HS3S4	Q9Y661	HS3ST4	0.151589	0.213724	0.547942
NUP210L.9606.4	P210L	Q5VU65	NUP210L	0.151516	0.213947	0.548225
UBE2J1.6900.30	UB2J1	Q9Y385	UBE2J1	0.15137	0.214394	0.548494
YEATS4.17474.106	YETS4	O95619	YEATS4	0.151297	0.214618	0.548494
SSB.13625.19	LA	P05455	SSB	0.151187	0.214954	0.549064
TRH.5659.11	TRH	P20396	TRH	0.151041	0.215403	0.549914
DPP10.7890.68	DPP10	Q8N608	DPP10	0.150968	0.215628	0.549914
MPST.12686.15	THTM	P25325	MPST	0.150749	0.216303	0.550757
PSMA6.3860.7	PSA6	P60900	PSMA6	0.15042	0.217318	0.551604
ASRGL1.18313.4	Asparaginase-like protein 1	Q7L266	ASRGL1	0.150311	0.217657	0.551604
STXBP6.18308.30	STXB6	Q8NFX7	STXBP6	0.150311	0.217657	0.551604
ADCYAP1.8285.64	PACA	P18509	ADCYAP1	0.150237	0.217884	0.551889
NR5A2.12444.39	NR5A2	O00482	NR5A2	0.149872	0.219018	0.553888
KIF1C.9899.28	KIF1C	O43896	KIF1C	0.149689	0.219586	0.554165
ULBP3.2747.3	ULBP-3	Q9BZM4	ULBP3	0.149653	0.2197	0.554165
IL12RB1.2632.5	IL-12 Rb1	P42701	IL12RB1	0.149616	0.219814	0.554165
FUT2.9121.28	FUT2	Q10981	FUT2	0.149543	0.220042	0.554165
RPS5.19195.85	RS5	P46782	RPS5	0.149507	0.220156	0.554165
RPS6KA1.12329.21	KS6A1	Q15418	RPS6KA1	0.14947	0.22027	0.554165
ALKBH3.18401.18	ALKB3	Q96Q83	ALKBH3	0.149324	0.220727	0.555026
ACPP.19317.114	Prostatic acid phosphatase	P15309	ACPP	0.149141	0.221298	0.555308
FCGR1A.3312.64	FCGR1	P12314	FCGR1A	0.149141	0.221298	0.555308
EPHB6.5078.82	EphB6	O15197	EPHB6	0.149105	0.221413	0.555308
MANF.9223.11	ARMET	P55145	MANF	0.149068	0.221527	0.555308
PDGFRL.9713.67	PGFRL	Q15198	PDGFRL	0.148995	0.221756	0.555308
CDC37.3879.50	CDC37	Q16543	CDC37	0.148922	0.221986	0.555308
NLRP1.11661.11	NALP1	Q9C000	NLRP1	0.148849	0.222215	0.555309
SMURF1.11557.3	SMUF1	Q9HCE7	SMURF1	0.148776	0.222445	0.555309
ASH2L.12832.10	ASH2L	Q9UBL3	ASH2L	0.148703	0.222675	0.555597
CSMD1.9598.23	CSMD1	Q96PZ7	CSMD1	0.14863	0.222905	0.555598
COLEC10.6558.5	COL10	Q9Y6Z7	COLEC10	0.148009	0.224866	0.557333
MRPL2.19132.1	RM02	Q5T653	MRPL2	0.148009	0.224866	0.557333
CHST11.7779.86	CHSTB	Q9NPF2	CHST11	0.147972	0.224982	0.557333
PXDNL.11324.3	PXDNL	A1KZ92	PXDNL	0.147972	0.224982	0.557333
IMPDH2.5250.53	IMDH2	P12268	IMPDH2	0.147936	0.225098	0.557335
LCK.3452.17	LCK	P06239	LCK	0.147899	0.225213	0.557337
NPL.19496.1	NPL	Q9BXD5	NPL	0.147607	0.226142	0.559348
TMED4.9319.59	TMED4	Q7Z7H5	TMED4	0.147534	0.226374	0.559354
MUTED.19116.1	MUTED	Q8TDH9	MUTED	0.147424	0.226723	0.559643
UGT2A1.8907.11	UD2A1	Q9Y4X1	UGT2A1	0.147388	0.226839	0.559645
COTL1.4905.63	Coactosin-like protein	Q14019	COTL1	0.147168	0.227539	0.561085
FNDC4.13451.2	FNDC4	Q9H6D8	FNDC4	0.146803	0.228708	0.562535
SCUBE3.16773.29	SCUB3	Q8IX30	SCUBE3	0.146803	0.228708	0.562535
SPP1.13113.7	Osteopontin	P10451	SPP1	0.146803	0.228708	0.562535
SLAMF8.8994.65	SLAMF8	Q9P0V8	SLAMF8	0.146767	0.228825	0.562537
CETN2.13078.3	CETN2	P41208	CETN2	0.146693	0.229059	0.562545
PTRH2.16887.29	PTH2	Q9Y3E5	PTRH2	0.146657	0.229176	0.562545
CYTH2.12533.135	CYH2	Q99418	CYTH2	0.146438	0.229881	0.563703
SOCS3.11440.58	SOCS-3	O14543	SOCS3	0.146401	0.229998	0.563706
MNX1.9576.58	MNX1	P50219	MNX1	0.146145	0.230822	0.565439
XRCC1.12535.2	XRCC1	P18887	XRCC1	0.14578	0.232003	0.568044
CHST15.4469.78	ST4S6	Q7LFX5	CHST15	0.145744	0.232121	0.568046
NME1.5909.51	Nucleoside diphosphate kinase A	P15531	NME1	0.145634	0.232476	0.568341
H1FX.12709.63	H1X	Q92522	H1FX	0.145524	0.232832	0.568923
KIAA1549L.11145.72	K154L	Q6ZVL6	KIAA1549L	0.145488	0.232951	0.568926
PAFAH2.18914.188	PAFA2	Q99487	PAFAH2	0.145415	0.233188	0.569218
NCF2.10047.12	NCF-2	P19878	NCF2	0.145195	0.233901	0.569882
A4GNT.10835.25	A4GCT	Q9UNA3	A4GNT	0.14494	0.234734	0.569882
PLA2G5.2449.1	GV	P39877	PLA2G5	0.14494	0.234734	0.569882
SMR3A.7838.27	SMR3A	Q99954	SMR3A	0.14472	0.235451	0.569882
EHF.13387.55	EHF	Q9NZC4	EHF	0.144684	0.23557	0.569882
DCN.2666.53	Bone proteoglycan II	P07585	DCN	0.144611	0.235809	0.569882
ACBD7.13563.259	ACBD7	Q8N6N7	ACBD7	0.144538	0.236049	0.569882
BGLAP.11067.13	Osteocalcin	P02818	BGLAP	0.144538	0.236049	0.569882
IL7R.5089.11	IL-7 Ra	P16871	IL7R	0.144538	0.236049	0.569882
IER3.9786.310	IEX1	P46695	IER3	0.144063	0.237608	0.572506
CTHRC1.15467.10	CTHR1	Q96CG8	CTHRC1	0.144026	0.237728	0.572511
RSPO3.13094.75	RSPO3	Q9BXY4	RSPO3	0.143953	0.237969	0.572805
EFNB2.8772.5	EFNB2	P52799	EFNB2	0.14388	0.23821	0.572816
ST3GAL2.6281.51	SIA4B	Q16842	ST3GAL2	0.143734	0.238692	0.573406
PDE3A.5254.69	PDE3A	Q14432	PDE3A	0.143551	0.239296	0.574007
CSF1R.13682.47	M-CSF R	P07333	CSF1R	0.143515	0.239417	0.574007
DKK2.15678.71	DKK2	Q9UBU2	DKK2	0.143515	0.239417	0.574007
ALK.8249.124	ALK	Q9UM73	ALK	0.143186	0.240506	0.576334
TRAPPC5.8671.378	TPPC5	Q8IUR0	TRAPPC5	0.143076	0.24087	0.576921
HNRNPD.18348.89	HNRPD	Q14103	HNRNPD	0.14293	0.241356	0.576943
MYNN.12455.48	MYNN	Q9NPC7	MYNN	0.142748	0.241964	0.577289
NRXN1.8971.9	NRX1A	Q9ULB1	NRXN1	0.142748	0.241964	0.577289
FOXJ2.14204.55	FOXJ2	Q9P0K8	FOXJ2	0.142711	0.242086	0.577289
CA12.19347.37	Carbonic Anhydrase XII	O43570	CA12	0.142638	0.24233	0.577289
PSMB4.18340.2	Proteasome beta chain	P28070	PSMB4	0.142419	0.243062	0.5776
S100A6.13090.17	S100A6	P06703	S100A6	0.142273	0.243551	0.578478
PTGDS.10514.5	PGD2 synthase	P41222	PTGDS	0.142199	0.243795	0.578775
RBM19.11468.15	RBM19	Q9Y4C8	RBM19	0.14198	0.24453	0.579384
MXRA7.8005.1	MXRA7	P84157	MXRA7	0.141798	0.245144	0.579727
TRABD2A.9401.57	CB089	Q86V40	TRABD2A	0.141688	0.245513	0.579727
PDYN.19638.9	Dynorphin A (1-17)	P01213	PDYN	0.141432	0.246375	0.581195
CD163.5028.59	sCD163	Q86VB7	CD163	0.141176	0.247239	0.582382
BRSK2.9790.28	BR serine/threonine kinase 2	Q8IWQ3	BRSK2	0.140592	0.249221	0.585344
CHST4.18876.77	CHST4	Q8NCG5	CHST4	0.140592	0.249221	0.585344
DEFA5.16785.45	HD-5	Q01523	DEFA5	0.140373	0.249968	0.586812
DIMT1.12694.28	DIM1	Q9UNQ2	DIMT1	0.140336	0.250092	0.58682
ACLY.12700.9	ACLY	P53396	ACLY	0.140227	0.250466	0.587128
CXCL16.2436.49	CXCL16, soluble	Q9H2A7	CXCL16	0.14008	0.250965	0.587561
FCAR.4987.17	FCAR	P24071	FCAR	0.140044	0.25109	0.587561
OLA1.12659.13	GTPB9	Q9NTK5	OLA1	0.139898	0.25159	0.587561
CHFR.11320.29	CHFR	Q96EP1	CHFR	0.139861	0.251715	0.587561
LILRB1.5090.49	ILT-2	Q8NHL6	LILRB1	0.139788	0.251965	0.587561
RMI1.13926.1	RMI1	Q9H9A7	RMI1	0.139788	0.251965	0.587561
DEFB129.8347.222	DB129	Q9H1M3	DEFB129	0.139752	0.25209	0.587561
NAP1L2.13529.39	NP1L2	Q9ULW6	NAP1L2	0.139678	0.252341	0.587561
EIF4A2.18824.7	IF4A2	Q14240	EIF4A2	0.139642	0.252466	0.587561
RSPO4.8464.31	RSPO4	Q2I0M5	RSPO4	0.138802	0.255361	0.591162
HSF2BP.19139.3	HSF2B	O75031	HSF2BP	0.138729	0.255613	0.591465
ADGRG5.4551.72	GP114	Q8IZF4	ADGRG5	0.138692	0.25574	0.591474
LIPK.6413.79	LIPK	Q5VXJ0	LIPK	0.138546	0.256246	0.591797
MIF.8221.19	MIF	P14174	MIF	0.138546	0.256246	0.591797
CSNK2B.11330.15	CSK2B	P67870	CSNK2B	0.138509	0.256373	0.591808
SEPSECS.17357.33	SPCS	Q9HD40	SEPSECS	0.1384	0.256753	0.592403
CTRB2.5648.28	CTRB2	Q6GPI1	CTRB2	0.13829	0.257133	0.592434
AARS.12340.17	SYAC	P49588	AARS	0.138034	0.258023	0.593918
CNN2.18877.15	CNN2	Q99439	CNN2	0.137961	0.258277	0.594222
VASN.5682.13	VASN	Q6EMK4	VASN	0.137706	0.25917	0.59573
FKBP14.9340.17	FKB14	Q9NWM8	FKBP14	0.137632	0.259425	0.59573
INPP5E.11370.20	INP5E	Q9NRR6	INPP5E	0.137632	0.259425	0.59573
SYT17.9110.2	SYT17	Q9BSW7	SYT17	0.137632	0.259425	0.59573
EXOSC3.12605.1	Exosome component 3	Q9NQT5	EXOSC3	0.137523	0.259808	0.596327
DEFB121.5765.53	DB121	Q5J5C9	DEFB121	0.137377	0.26032	0.596936
HTATIP2.7753.21	HTAI2	Q9BUP3	HTATIP2	0.137377	0.26032	0.596936
PLCG2.10070.22	PLCG2	P16885	PLCG2	0.137267	0.260704	0.597037
ASPN.6451.64	ASPN	Q9BXN1	ASPN	0.137231	0.260832	0.597037
LY6G6C.6256.9	LY66C	O95867	LY6G6C	0.137194	0.26096	0.597037
ABCC6.8935.22	MRP6	O95255	ABCC6	0.137121	0.261217	0.597037
LRMP.10704.91	LRMP	Q12912	LRMP	0.137048	0.261473	0.597037
CKAP2.5345.51	CKAP2	Q8WWK9	CKAP2	0.136792	0.262373	0.597898
PSG5.9314.9	PSG5	Q15238	PSG5	0.136719	0.26263	0.597898
PAPPA2.5756.66	PAPP2	Q9BXP8	PAPPA2	0.136463	0.263533	0.597898
C17orf89.9030.56	CQ089	A1L188	C17orf89	0.136317	0.264049	0.597898
KLK13.11152.46	kallikrein 13	Q9UKR3	KLK13	0.136317	0.264049	0.597898
NEFL.10082.251	NFL	P07196	NEFL	0.136317	0.264049	0.597898
KEAP1.8485.7	KEAP1	Q14145	KEAP1	0.136244	0.264308	0.597898
KIR2DL5A.8000.17	KI2LA	Q8N109	KIR2DL5A	0.136208	0.264437	0.597898
LRRC3B.18947.3	LRC3B	Q96PB8	LRRC3B	0.136208	0.264437	0.597898
NDRG1.19215.7	NDRG1	Q92597	NDRG1	0.136208	0.264437	0.597898
CRYZL1.9207.60	QORL1	O95825	CRYZL1	0.136171	0.264566	0.597898
GZMK.9545.156	Granzyme K	P49863	GZMK	0.136061	0.264955	0.598496
ANXA6.5335.73	annexin VI	P08133	ANXA6	0.135988	0.265214	0.598802
AMMECR1L.18402.1	AMERL	Q6DCA0	AMMECR1L	0.135842	0.265733	0.598871
UNC13A.14052.26	UN13A	Q9UPW8	UNC13A	0.135733	0.266122	0.599177
CHST6.4429.51	CHST6	Q9GZX3	CHST6	0.135586	0.266642	0.599233
SETMAR.12462.20	SETMR	Q53H47	SETMAR	0.135586	0.266642	0.599233
STMN2.10900.272	STMN2	Q93045	STMN2	0.135513	0.266902	0.599262
STOML2.6555.58	Stomatin-like protein 2	Q9UJZ1	STOML2	0.135185	0.268075	0.60106
VHL.17362.5	VHL	P40337	VHL	0.135038	0.268598	0.601953
PVRIG.6464.40	PVRIG	Q6DKI7	PVRIG	0.134856	0.269252	0.602861
IGF1R.4232.19	IGF-I sR	P08069	IGF1R	0.13471	0.269776	0.603755
ZNF843.8321.27	ZN843	Q8N446	ZNF843	0.13449	0.270564	0.604679
ANXA9.13588.11	ANXA9	O76027	ANXA9	0.134271	0.271352	0.605883
DNAJB4.18884.22	DNJB4	Q9UDY4	DNAJB4	0.134235	0.271484	0.605897
GAS1.5463.22	GAS1	P54826	GAS1	0.133906	0.272671	0.607426
FANCF.11336.9	FANCF	Q9NPI8	FANCF	0.133833	0.272935	0.607456
TPT1.3872.2	TCTP	P13693	TPT1	0.133796	0.273067	0.607471
P4HA1.11645.9	P4HA1	P13674	P4HA1	0.133687	0.273464	0.608074
MASP1.9125.23	MASP3	P48740	MASP1	0.13365	0.273596	0.608089
SDCBP2.19261.12	SDCB2	Q9H190	SDCBP2	0.133577	0.273861	0.608398
HIST1H3A.14146.92	H31	P68431	HIST1H3A	0.133504	0.274126	0.608428
PGD.4187.49	6-Phosphogluconate dehydrogenase	P52209	PGD	0.133504	0.274126	0.608428
C19orf18.9445.44	CS018	Q8NEA5	C19orf18	0.133321	0.274789	0.608784
CANX.8834.58	Calnexin	P27824	CANX	0.133321	0.274789	0.608784
FGF8.4394.71	FGF-8A	P55075	FGF8	0.133321	0.274789	0.608784
RNF122.11160.56	RN122	Q9H9V4	RNF122	0.133285	0.274922	0.6088
PTH1R.13470.43	PTH1R	Q03431	PTH1R	0.133212	0.275187	0.608831
CREB3L1.11198.37	CR3L1	Q96BA8	CREB3L1	0.132919	0.276251	0.610628
SCGB3A1.6252.62	Secretoglobin family 3A member 1	Q96QR1	SCGB3A1	0.132773	0.276784	0.611248
HTN1.10608.9	HIS1	P15515	HTN1	0.13259	0.277452	0.612015
STIP1.5489.18	Stress-induced-phosphoprotein 1	P31948	STIP1	0.132517	0.277719	0.612015
DNAJA2.11582.63	DNJA2	O60884	DNAJA2	0.132444	0.277986	0.612015
PON1.4261.55	paraoxonase 1	P27169	PON1	0.132335	0.278388	0.612015
HHIP.10833.64	HHIP	Q96QV1	HHIP	0.132298	0.278522	0.612015
MTAP.9910.9	MTAP	Q13126	MTAP	0.132298	0.278522	0.612015
TIMD4.15449.33	TIM-4	Q96H15	TIMD4	0.132115	0.279192	0.612376
SELM.15336.7	SELM	Q8WWX9	SELM	0.132079	0.279326	0.612393
CGB2.6213.10	CGB2	Q6NT52	CGB2	0.131677	0.280805	0.614296
NLGN1.15620.4	NLGN1	Q8N2Q7	NLGN1	0.131677	0.280805	0.614296
HP.3054.3	Haptoglobin, Mixed Type	P00738	HP	0.131604	0.281074	0.614296
FANCL.10063.10	FANCL	Q9NW38	FANCL	0.131421	0.281748	0.61492
DIDO1.14329.4	DIDO1	Q9BTC0	DIDO1	0.131239	0.282424	0.615838
MRPL21.8942.2	RM21	Q7Z2W9	MRPL21	0.131092	0.282965	0.61674
ROBO3.5117.14	ROBO3	Q96MS0	ROBO3	0.130873	0.283777	0.618234
LAIR2.7130.4	LAIR2	Q6ISS4	LAIR2	0.130837	0.283913	0.618251
BPIFA2.16302.11	SPLC2	Q96DR5	BPIFA2	0.130471	0.285271	0.620651
BIN1.9574.11	BIN1	O00499	BIN1	0.130435	0.285408	0.620668
MAPK1.3115.64	MK01	P28482	MAPK1	0.130325	0.285816	0.621278
LY6G6D.6469.62	LY66D	O95868	LY6G6D	0.130252	0.286089	0.621591
TTC17.9550.153	TTC17	Q96AE7	TTC17	0.130216	0.286225	0.621609
CD4.3143.3	sCD4	P01730	CD4	0.130033	0.286907	0.622585
PAF.19158.1	PAF	Q15004	PAF	0.12996	0.287181	0.622585
PNPLA2.9802.27	PLPL2	Q96AD5	PNPLA2	0.12996	0.287181	0.622585
RBM17.17391.10	SPF45	Q96I25	RBM17	0.129923	0.287317	0.622585
TMEM132A.7871.16	T132A	Q24JP5	TMEM132A	0.129741	0.288001	0.623788
ACP6.5742.14	PPA6	Q9NPH0	ACP6	0.129521	0.288824	0.624731
PGLS.17799.9	6PGL	O95336	PGLS	0.129302	0.289647	0.625954
BPIFB1.15367.38	LPLC1	Q8TDL5	BPIFB1	0.129119	0.290335	0.626881
NUDT16L1.12497.29	SDOS	Q9BRJ7	NUDT16L1	0.12901	0.290748	0.627213
MUC16.15565.102	CA125	Q8WXI7	MUC16	0.1289	0.291162	0.627826
TMEM87B.13485.20	TM87B	Q96K49	TMEM87B	0.128864	0.2913	0.627844
TNC.2728.62	Tenascin	P24821	TNC	0.128389	0.293097	0.629755
HAAO.5861.78	3HAO	P46952	HAAO	0.128279	0.293513	0.630369
CACYBP.12432.23	CYBP	Q9HB71	CACYBP	0.127877	0.29504	0.631689
MAP3K7.TAB1.5259.2	TAK1-TAB1	O43318 Q15750	MAP3K7 TAB1	0.127877	0.29504	0.631689
ALDOB.18185.118	ALDOB	P05062	ALDOB	0.127804	0.295318	0.631763
TMPRSS15.3189.61	Enterokinase	P98073	TMPRSS15	0.127768	0.295458	0.631763
KRT5.11177.16	K2C5	P13647	KRT5	0.127695	0.295736	0.631782
NRIP3.18237.29	NRIP3	Q9NQ35	NRIP3	0.127585	0.296154	0.632118
NANOG.2732.58	NANOG	Q9H9S0	NANOG	0.127512	0.296433	0.632156
ARMC5.8785.1	ARMC5	Q96C12	ARMC5	0.127256	0.297411	0.63226
CD55.5069.9	DAF	P08174	CD55	0.127073	0.298111	0.63226
JMJD6.18322.15	JMJD6	Q6NYC1	JMJD6	0.127037	0.298251	0.63226
GAPDH.3848.14	GAPDH, liver	P04406	GAPDH	0.126927	0.298672	0.63226
SHC2.14074.2	SHC2	P98077	SHC2	0.126891	0.298812	0.63226
CD300LF.5623.11	CLM1	Q8TDQ1	CD300LF	0.126818	0.299092	0.63226
FGFR1.5532.53	bFGF-R	P11362	FGFR1	0.126781	0.299233	0.63226
CDKN1A.18291.8	p21	P38936	CDKN1A	0.126745	0.299373	0.63226
CEACAM3.8999.19	CEAM3	P40198	CEACAM3	0.126672	0.299654	0.63226
NEURL4.13468.5	NEUL4	Q96JN8	NEURL4	0.126672	0.299654	0.63226
RNASE2.8394.56	RNase 2	P10153	RNASE2	0.126672	0.299654	0.63226
BRD2.15372.43	BRD2	P25440	BRD2	0.126598	0.299935	0.63226
DEFB108B.5611.56	D108B	Q8NET1	DEFB108B	0.126525	0.300217	0.63226
ITGB7.11205.10	Integrin beta-7	P26010	ITGB7	0.126489	0.300357	0.63226
RPL30.12478.15	RL30	P62888	RPL30	0.126489	0.300357	0.63226
AMIGO1.9979.13	AMGO1	Q86WK6	AMIGO1	0.126416	0.300639	0.63226
MATN2.3325.2	MATN2	O00339	MATN2	0.126416	0.300639	0.63226
CAB39.17757.86	CAB39	Q9Y376	CAB39	0.126379	0.30078	0.63226
LRRTM4.6572.10	LRRT4	Q86VH4	LRRTM4	0.126343	0.300921	0.63226
UBE2V1.11626.7	UB2V1	Q13404	UBE2V1	0.12627	0.301203	0.632304
KREMEN2.3202.28	KREM2	Q8NCW0	KREMEN2	0.126233	0.301344	0.632326
CSH1.CSH2.13103.125	CSH	P0DML2 P0DML3	CSH1 CSH2	0.125977	0.302332	0.633576
GCLM.18214.2	GSH0	P48507	GCLM	0.125831	0.302898	0.633665
ASCC1.10647.18	ASCC1	Q8N9N2	ASCC1	0.125429	0.304457	0.635828
ADAM17.8882.1	ADAM 17	P78536	ADAM17	0.125356	0.304741	0.635873
DNAJC30.7866.11	DJC30	Q96LL9	DNAJC30	0.124954	0.306307	0.63804
HDLBP.13570.43	VIGLN	Q00341	HDLBP	0.124918	0.306449	0.638062
KIAA0040.14603.51	KIAA0040	J3QR46	KIAA0040	0.124881	0.306592	0.638085
IL11.4493.92	IL-11	P20809	IL11	0.124772	0.30702	0.638153
CRLF1.14747.9	CRLF1	O75462	CRLF1	0.124333	0.308736	0.639822
CHST14.7262.191	CHSTE	Q8NCH0	CHST14	0.12426	0.309023	0.639845
GLCE.7808.5	GLCE	O94923	GLCE	0.124151	0.309453	0.640462
COX5B.7887.57	COX5B	P10606	COX5B	0.124077	0.30974	0.640782
CLEC2L.8242.9	CLC2L	P0C7M8	CLEC2L	0.123895	0.310459	0.64172
CHST1.7803.4	CHST1	O43916	CHST1	0.123822	0.310746	0.642041
MCM6.9897.9	MCM6	Q14566	MCM6	0.123676	0.311322	0.642551
IL17F.14026.24	IL-17F	Q96PD4	IL17F	0.123566	0.311754	0.642551
CCDC90B.7792.58	CC90B	Q9GZT6	CCDC90B	0.123529	0.311899	0.642551
LDHC.9828.86	LDHC	P07864	LDHC	0.123493	0.312043	0.642551
MRC2.3041.55	MRC2	Q9UBG0	MRC2	0.123493	0.312043	0.642551
AURKA.3091.70	Aurora kinase A	O14965	AURKA	0.123456	0.312187	0.642551
GTF2I.13609.11	GTF2I	P78347	GTF2I	0.123456	0.312187	0.642551
GRAMD1C.8842.16	GRM1C	Q8IYS0	GRAMD1C	0.12331	0.312765	0.643193
FAM171B.8061.102	F171B	Q6P995	FAM171B	0.123091	0.313632	0.644157
PTPN6.4318.12	PTP-1C	P29350	PTPN6	0.123091	0.313632	0.644157
NELL2.6022.57	NELL2	Q99435	NELL2	0.122908	0.314357	0.645097
UTS2R.13530.5	UR2R	Q9UKP6	UTS2R	0.122908	0.314357	0.645097
ACVR2B.9412.52	Activin RIIB	Q13705	ACVR2B	0.122579	0.315663	0.646409
MRPL32.7982.10	RM32	Q9BYC8	MRPL32	0.122579	0.315663	0.646409
REXO2.13590.1	ORN	Q9Y3B8	REXO2	0.12236	0.316536	0.647375
LDOC1.8378.3	LDOC1	O95751	LDOC1	0.122287	0.316827	0.647697
POLM.12851.5	DPOLM	Q9NP87	POLM	0.122251	0.316973	0.647721
BRD4.10043.31	BRD4	O60885	BRD4	0.122178	0.317264	0.64777
CTGF.2975.19	CTGF	P29279	CTGF	0.122178	0.317264	0.64777
COPS7B.12384.92	CSN7B	Q9H9Q2	COPS7B	0.122104	0.317556	0.64782
PRPS1.11381.56	PRPS1	P60891	PRPS1	0.122104	0.317556	0.64782
PLA2G2E.2447.7	GIIE	Q9NZK7	PLA2G2E	0.121776	0.318871	0.649408
CAPSL.13688.2	CAPSL	Q8WWF8	CAPSL	0.121593	0.319603	0.649831
CLSTN1.15521.4	Alcadein alpha-1	O94985	CLSTN1	0.121556	0.319749	0.649831
GFRA2.2515.14	GFRa-2	O00451	GFRA2	0.121483	0.320043	0.649881
PANK3.12658.72	PANK3	Q9H999	PANK3	0.121264	0.320923	0.651123
NMT2.17821.20	NMT2	O60551	NMT2	0.120972	0.3221	0.652988
ABL2.3342.76	ABL2	P42684	ABL2	0.120935	0.322247	0.652988
BID.5798.3	BID	P55957	BID	0.120899	0.322394	0.653013
VIMP.11286.78	SELS	Q9BQE4	VIMP	0.12068	0.323279	0.653788
CRIP1.18275.5	CRIP1	P50238	CRIP1	0.120643	0.323426	0.653788
ARRDC3.12352.70	ARRD3	Q96B67	ARRDC3	0.12057	0.323722	0.653788
PDCD6IP.18174.79	PDC6I	Q8WUM4	PDCD6IP	0.12057	0.323722	0.653788
PPA1.5021.13	PPase	Q15181	PPA1	0.12057	0.323722	0.653788
LOXL3.15427.35	LOXL3	P58215	LOXL3	0.12046	0.324165	0.654138
TNFRSF10A.4832.75	TRAIL R1	O00220	TNFRSF10A	0.12046	0.324165	0.654138
TNFRSF19.5131.15	TAJ	Q9NS68	TNFRSF19	0.120424	0.324313	0.654164
LSAMP.2999.6	LSAMP	Q13449	LSAMP	0.120058	0.325794	0.654697
HybControlElution.2178.55	HCE003167	HCE003167	HCE003167	0.119876	0.326536	0.655916
EIF4EBP1.17372.5	4EBP1	Q13541	EIF4EBP1	0.119803	0.326833	0.656241
TSTD1.19277.4	KAT	Q8NFU3	TSTD1	0.119693	0.327279	0.656864
POLH.10022.207	POLH	Q9Y253	POLH	0.11951	0.328023	0.65713
F10.4878.3	Coagulation Factor X	P00742	F10	0.119474	0.328172	0.65713
LRP11.15472.16	LRP11	Q86VZ4	LRP11	0.119437	0.328321	0.65713
FIG4.6948.82	FIG4	Q92562	FIG4	0.119401	0.32847	0.65713
PCMT1.18160.2	PIMT	P22061	PCMT1	0.119328	0.328769	0.65713
C10orf105.11220.53	CJ105	Q8TEF2	C10orf105	0.119218	0.329216	0.657238
DOK1.16831.7	DOK1	Q99704	DOK1	0.119182	0.329366	0.657238
RAB3B.16847.39	RAB3B	P20337	RAB3B	0.119182	0.329366	0.657238
VCL.8750.46	Vinculin	P18206	VCL	0.119145	0.329515	0.657265
CFHR4.6471.53	FHR4	Q92496	CFHR4	0.119035	0.329963	0.657889
GUCA2B.6223.5	GUC2B	Q16661	GUCA2B	0.118962	0.330262	0.657943
C1QL1.6404.20	C1QRF	O75973	C1QL1	0.118853	0.330711	0.658324
PTPRS.6049.64	PTPRS	Q13332	PTPRS	0.118816	0.330861	0.658324
TSLP.3010.53	TSLP	Q969D9	TSLP	0.118816	0.330861	0.658324
PDCL2.14192.31	PDCL2	Q8N4E4	PDCL2	0.118743	0.331161	0.658379
SMARCC1.11180.17	SMRC1	Q92922	SMARCC1	0.118707	0.33131	0.658407
TNFRSF4.3730.81	TNR4	P43489	TNFRSF4	0.11867	0.33146	0.658434
ACRV1.10507.166	sperm protein 10	P26436	ACRV1	0.11856	0.33191	0.659058
LDHB.3890.8	LDH-H 1	P07195	LDHB	0.118414	0.332511	0.65998
PMP2.15422.12	MYP2	P02689	PMP2	0.118268	0.333112	0.660175
SULT1E1.16932.5	SULT 1E	P49888	SULT1E1	0.118268	0.333112	0.660175
CCL27.2192.63	CTACK	Q9Y4X3	CCL27	0.118159	0.333564	0.660175
MPP6.13490.1	MPP6	Q9NZW5	MPP6	0.118159	0.333564	0.660175
BNIP3L.7835.2	BNI3L	O60238	BNIP3L	0.118049	0.334015	0.66026
PROL1.6530.63	PROL1	Q99935	PROL1	0.118049	0.334015	0.66026
SNX3.19503.2	SNX3	O60493	SNX3	0.118049	0.334015	0.66026
CRMP1.18323.39	DRP-1	Q14194	CRMP1	0.117976	0.334317	0.660317
JAG2.5093.47	JAG2	Q9Y219	JAG2	0.117976	0.334317	0.660317
LAYN.2635.61	Layilin	Q6UX15	LAYN	0.117939	0.334468	0.660345
PTEN.3831.21	pTEN	P60484	PTEN	0.117903	0.334618	0.660374
MAPK14.5007.1	MAPK14	Q16539	MAPK14	0.117793	0.335071	0.660729
HDGF.16758.96	HDGF	P51858	HDGF	0.117757	0.335222	0.660757
FN1.3435.53	FN1.4	P02751	FN1	0.117647	0.335675	0.660844
HS3ST4.8998.15	HS3S4	Q9Y661	HS3ST4	0.117611	0.335826	0.660873
SARS.18178.13	SYSC	P49591	SARS	0.117318	0.337037	0.662717
ADAM29.13549.15	ADA29	Q9UKF5	ADAM29	0.117136	0.337795	0.663938
LMAN2.9468.8	Lectin, mannose-binding 2	Q12907	LMAN2	0.117099	0.337947	0.663967
SBDS.3866.7	SBDS	Q9Y3A5	SBDS	0.116989	0.338403	0.664592
UBE2D3.19280.29	UB2D3	P61077	UBE2D3	0.116953	0.338555	0.664621
GLA.15588.17	galactosidase, alpha	P06280	GLA	0.11688	0.338859	0.664948
TP53I3.17748.21	QORX	Q53FA7	TP53I3	0.116843	0.339011	0.664977
BAGE2.6294.11	BAGE2	Q86Y30	BAGE2	0.11677	0.339315	0.665035
PDLIM4.12387.7	PDLI4	P50479	PDLIM4	0.11677	0.339315	0.665035
SRP14.17510.7	SRP14	P37108	SRP14	0.116734	0.339467	0.665064
APOE.2937.10	Apo E3	P02649	APOE	0.116661	0.339772	0.665152
ADAM12.4420.7	ADAM12	O43184	ADAM12	0.116624	0.339924	0.665152
NPPB.3723.1	BNP-32	P16860	NPPB	0.116624	0.339924	0.665152
TNFRSF8.2605.49	CD30	P28908	TNFRSF8	0.116588	0.340076	0.665181
IGHG1.IGHG2.IGHG3.IGHG4.IGK.IGL.2744.57	IgG	P01857	IGHG1 IGHG2 IGHG3 IGHG4 IGK@ IGL@	0.116478	0.340534	0.665538
LSM1.17795.176	LSM1	O15116	LSM1	0.116295	0.341297	0.666223
DAPK2.4355.13	DAPK2	Q9UIK4	DAPK2	0.115966	0.342673	0.667564
CCDC80.3234.23	URB	Q76M96	CCDC80	0.115747	0.343592	0.668817
SYF2.19438.68	SYF2	O95926	SYF2	0.115674	0.343899	0.669145
DEFB119.8315.5	DB119	Q8N690	DEFB119	0.115528	0.344513	0.669802
FLRT3.13123.3	FLRT3	Q9NZU0	FLRT3	0.115418	0.344974	0.67016
PPIA.3844.2	Cyclophilin A	P62937	PPIA	0.115418	0.344974	0.67016
G6PD.19297.4	G6PD	P11413	G6PD	0.115345	0.345282	0.67022
CCDC101.12788.6	SGF29	Q96ES7	CCDC101	0.11498	0.346822	0.672402
DHRS9.17467.1	DHRS9	Q9BPW9	DHRS9	0.114834	0.347439	0.673329
ARTN.2939.10	Artemin	Q5T4W7	ARTN	0.114761	0.347748	0.673389
RPS6KA6.12688.115	KS6A6	Q9UK32	RPS6KA6	0.114541	0.348676	0.674377
NPNT.6342.10	Nephronectin	Q6UXI9	NPNT	0.114468	0.348986	0.674706
DNAJB11.7110.2	DJB11	Q9UBS4	DNAJB11	0.114432	0.349141	0.674736
CREB3L2.17336.54	CR3L2	Q70SY1	CREB3L2	0.114249	0.349916	0.675694
TDO2.9880.33	T23O	P48775	TDO2	0.11414	0.350381	0.676324
DPT.4979.34	DERM	Q07507	DPT	0.114103	0.350536	0.676354
CTCF.14624.51	CTCF	P49711	CTCF	0.113774	0.351936	0.677495
FKBP4.17722.5	FKBP52 protein	Q02790	FKBP4	0.113701	0.352247	0.677495
ISCU.7201.5	ISCU	Q9H1K1	ISCU	0.113628	0.352559	0.677825
WFDC6.13412.5	WFDC6	Q9BQY6	WFDC6	0.113592	0.352715	0.677856
RAP2A.9885.41	RAP2A	P10114	RAP2A	0.113445	0.353338	0.678516
GPX2.18894.1	GPX2	P18283	GPX2	0.113117	0.354745	0.680354
GGPS1.17786.5	GGPPS	O95749	GGPS1	0.11297	0.355371	0.680354
F10.3077.66	Coagulation Factor Xa	P00742	F10	0.112897	0.355684	0.680354
CDC2.CCNB1.3422.4	CDK1/cyclin B	P06493 P14635	CDC2 CCNB1	0.112861	0.355841	0.680354
ENTPD2.18887.7	ENTP2	Q9Y5L3	ENTPD2	0.112861	0.355841	0.680354
SLITRK4.7139.14	SLIK4	Q8IW52	SLITRK4	0.112751	0.356311	0.680984
CYR61.6264.9	CYR61	O00622	CYR61	0.112715	0.356468	0.681015
CHMP2A.17728.61	CHM2A	O43633	CHMP2A	0.112605	0.356939	0.681646
B3GNT2.7980.72	B3GN2	Q9NY97	B3GNT2	0.112386	0.357882	0.681833
KIAA1161.8093.13	K1161	Q6NSJ0	KIAA1161	0.111765	0.360561	0.68586
TBCE.11211.7	TBCE	Q15813	TBCE	0.111728	0.360719	0.685891
CD200.5112.73	OX2G	P41217	CD200	0.111655	0.361036	0.686223
NLRP10.12821.6	NAL10	Q86W26	NLRP10	0.111545	0.36151	0.686586
IFNL2.4397.26	IFN-lambda 2	Q8IZJ0	IFNL2	0.111472	0.361827	0.686918
CPXM1.6255.74	CPXM1	Q96SM3	CPXM1	0.111217	0.362936	0.688008
NRXN3.5111.15	NRX3B	Q9HDB5	NRXN3	0.111144	0.363254	0.688008
SNX1.6955.68	SNX1	Q13596	SNX1	0.111144	0.363254	0.688008
KLK4.2833.20	Kallikrein 4	Q9Y5K2	KLK4	0.111034	0.36373	0.688167
APOE.5312.49	Apo E2	P02649	APOE	0.110961	0.364048	0.688167
CLEC2D.7054.87	CLC2D	Q9UHP7	CLEC2D	0.110778	0.364843	0.689132
VEGFA.19437.61	L-VEGF165	P15692	VEGFA	0.110778	0.364843	0.689132
DEFB4A.13397.88	HBD-2	O15263	DEFB4A	0.110669	0.365321	0.689421
SUMF1.6941.11	SUMF1	Q8NBK3	SUMF1	0.110559	0.365799	0.689421
HDAC8.2859.69	HDAC8	Q9BY41	HDAC8	0.110486	0.366118	0.689421
AIF1L.18871.24	AIF1L	Q9BQI0	AIF1L	0.110449	0.366277	0.689421
APLN.6622.90	APEL	Q9ULZ1	APLN	0.110449	0.366277	0.689421
TCEA1.18204.1	TCEA1	P23193	TCEA1	0.110449	0.366277	0.689421
EIF5.2612.5	eIF-5	P55010	EIF5	0.11034	0.366756	0.689583
ATG5.12597.68	Autophagy protein 5	Q9H1Y0	ATG5	0.110303	0.366915	0.689583
PAPPA.4148.49	PAPP-A	Q13219	PAPPA	0.110267	0.367075	0.689583
RPS19.19166.15	RS19	P39019	RPS19	0.110267	0.367075	0.689583
DKK4.3365.7	Dkk-4	Q9UBT3	DKK4	0.109974	0.368354	0.691182
IL23R.5088.175	IL-23 R	Q5VWK5	IL23R	0.109609	0.369957	0.693384
GHRL.8447.11	ghrelin	Q9UBU3	GHRL	0.109499	0.370439	0.69388
CYB5R3.7215.18	NADH-cytochrome b5 reductase	P00387	CYB5R3	0.109463	0.3706	0.69388
ZFAND5.18317.111	ZFAN5	O76080	ZFAND5	0.109426	0.37076	0.69388
PATE4.8065.245	PATE4	P0C8F1	PATE4	0.10939	0.370921	0.69388
DSCAML1.18886.28	DSCL1	Q8TD84	DSCAML1	0.109353	0.371082	0.69388
SUFU.17468.1	SUFU	Q9UMX1	SUFU	0.109024	0.372531	0.695013
CPN2.6415.90	CPN2	P22792	CPN2	0.108988	0.372692	0.695013
RPIA.12333.87	RPIA	P49247	RPIA	0.108988	0.372692	0.695013
EGFLAM.12338.27	EGFLA	Q63HQ2	EGFLAM	0.108878	0.373176	0.695545
CCL18.3044.3	PARC	P55774	CCL18	0.108696	0.373983	0.695545
CD74.6974.6	HG2A	P04233	CD74	0.108696	0.373983	0.695545
TAX1BP3.12498.12	TX1B3	O14907	TAX1BP3	0.108696	0.373983	0.695545
A2ML1.15482.12	A2ML1	A8K2U0	A2ML1	0.108586	0.374468	0.69578
P4HB.4278.14	Protein disulfide-isomerase	P07237	P4HB	0.108513	0.374791	0.69578
OOSP2.7106.37	PLACL	Q86WS3	OOSP2	0.108476	0.374953	0.69578
C1S.8840.61	C1s	P09871	C1S	0.10844	0.375115	0.69578
PARP1.10534.40	PARP	P09874	PARP1	0.10833	0.375601	0.696415
ULK3.12437.18	ULK3	Q6PHR2	ULK3	0.108294	0.375763	0.696448
CHRDL2.6086.15	CRDL2	Q6WN34	CHRDL2	0.108257	0.375925	0.696482
EIF4A3.4997.19	IF4A3	P38919	EIF4A3	0.108075	0.376736	0.697184
RGS7.12538.19	RGS7	P49802	RGS7	0.107855	0.37771	0.69872
BMP2.15666.21	BMP-2	P12643	BMP2	0.107636	0.378686	0.699991
ARL8B.8569.147	ARL8B	Q9NVJ2	ARL8B	0.107563	0.379012	0.700326
FCGR2A.3309.2	FCG2A	P12318	FCGR2A	0.107526	0.379175	0.700359
KIAA0319L.13698.28	K319L	Q8IZA0	KIAA0319L	0.10738	0.379827	0.701029
NFKBIB.17387.27	IKB-beta	Q15653	NFKBIB	0.107234	0.380479	0.701466
S100A2.11969.5	S100A2	P29034	S100A2	0.107198	0.380642	0.701466
LRP11.6713.4	LRP11	Q86VZ4	LRP11	0.107015	0.381459	0.702238
APOL1.9506.10	Apo L1	O14791	APOL1	0.106978	0.381623	0.702238
PNPO.17804.102	PNPO	Q9NVS9	PNPO	0.106942	0.381786	0.702238
NTNG1.5637.81	NTNG1	Q9Y2I2	NTNG1	0.106723	0.382769	0.703011
SRP19.18257.64	SRP19	P09132	SRP19	0.106686	0.382933	0.703011
ALOX15B.12422.143	LX15B	O15296	ALOX15B	0.10654	0.383588	0.703948
FRS2.13025.4	FRS2	Q8WU20	FRS2	0.106284	0.384738	0.705359
VCAN.9561.21	CSPG2	P13611	VCAN	0.106248	0.384902	0.705359
NTF4.4146.58	Neurotrophin-5	P34130	NTF4	0.106211	0.385066	0.705359
SERPINA12.6551.94	Vaspin	Q8IW75	SERPINA12	0.106175	0.385231	0.705359
FAM173A.7148.42	F173A	Q9BQD7	FAM173A	0.106065	0.385725	0.705462
TNXB.5698.60	Tenascin-X	P22105	TNXB	0.105992	0.386054	0.705798
ADM2.8100.15	ADM2	Q7Z4H4	ADM2	0.105882	0.386548	0.705902
ADRM1.9057.19	ADRM1	Q16186	ADRM1	0.105773	0.387043	0.706006
SGK3.10042.8	SGK3	Q96BR1	SGK3	0.105663	0.387538	0.706377
PCDH8.6280.11	PCDH8	O95206	PCDH8	0.105554	0.388033	0.707014
GP6.3194.36	GPVI	Q9HCN6	GP6	0.105517	0.388198	0.707049
PSTPIP1.19168.71	PPIP1	O43586	PSTPIP1	0.105444	0.388529	0.707385
ETV5.13403.5	ETV5	P41161	ETV5	0.105261	0.389356	0.708092
HYAL1.8309.12	HYAL1	Q12794	HYAL1	0.105261	0.389356	0.708092
EPB41.4706.17	41	P11171	EPB41	0.105042	0.390349	0.709101
ACE2.2805.6	ACE2	Q9BYF1	ACE2	0.104969	0.390681	0.709419
BRAT1.10876.300	BRAT1	Q6PJG6	BRAT1	0.104859	0.391179	0.709419
GLTPD2.7948.129	GLTD2	A6NH11	GLTPD2	0.104859	0.391179	0.709419
BRAF.15669.7	BRAF1	P15056	BRAF	0.104823	0.391345	0.709419
PSMA2.4280.47	PSA2	P25787	PSMA2	0.104823	0.391345	0.709419
PDILT.7092.7	PDILT	Q8N807	PDILT	0.104713	0.391843	0.709419
FAM3B.5618.50	FAM3B	P58499	FAM3B	0.104384	0.39334	0.711066
OSTN.7265.32	OSTN	P61366	OSTN	0.104238	0.394006	0.711196
VAPB.7181.17	VAPB	O95292	VAPB	0.104165	0.39434	0.711196
CHI3L1.11104.13	YKL-40	P36222	CHI3L1	0.104092	0.394673	0.711196
TLR3.16918.198	TLR3	O15455	TLR3	0.104092	0.394673	0.711196
TREML1.9329.28	TRML1	Q86YW5	TREML1	0.104092	0.394673	0.711196
SMIM24.7108.7	CS077	O75264	SMIM24	0.104056	0.39484	0.711196
CABLES2.7105.7	CABL2	Q9BTV7	CABLES2	0.103982	0.395174	0.711196
KLRG2.10762.2	KLRG2	A4D1S0	KLRG2	0.103982	0.395174	0.711196
MYL6B.14227.21	MYL6B	P14649	MYL6B	0.103982	0.395174	0.711196
PLBD2.6536.54	LAML2	Q8NHP8	PLBD2	0.103873	0.395675	0.711833
UBE2L3.3874.8	UB2L3	P68036	UBE2L3	0.10369	0.396511	0.712543
NPPB.7655.11	N-terminal pro-BNP	P16860	NPPB	0.103507	0.397348	0.713253
PRKCI.3379.29	KPCI	P41743	PRKCI	0.103507	0.397348	0.713253
ADCK4.9794.17	ADCK4	Q96D53	ADCK4	0.103471	0.397516	0.713289
ERP27.9333.59	ERP27	Q96DN0	ERP27	0.103398	0.397851	0.713627
RHOA.9855.10	Rho A	P61586	RHOA	0.102996	0.399697	0.715349
CAMKK1.18860.2	CaMKK alpha	Q8N5S9	CAMKK1	0.102886	0.400202	0.715796
BCL10.8768.4	Bcl-10	O95999	BCL10	0.10285	0.40037	0.715796
HS3ST1.15497.9	HS3S1	O14792	HS3ST1	0.102813	0.400538	0.715796
VAMP2.17335.18	VAMP2	P63027	VAMP2	0.102813	0.400538	0.715796
ING1.3888.8	ING1	Q9UK53	ING1	0.102667	0.401212	0.716207
PAX4.12398.15	PAX4	O43316	PAX4	0.102594	0.401549	0.716544
MST1.4407.10	MSP	P26927	MST1	0.102119	0.403744	0.71759
BLVRA.11382.5	BIEA	P53004	BLVRA	0.102083	0.403913	0.71759
RHOG.12540.25	RHOG	P84095	RHOG	0.102083	0.403913	0.71759
CAPN1.CAPNS1.2668.70	Calpain I	P07384 P04632	CAPN1 CAPNS1	0.102046	0.404082	0.717627
MAP4K3.8978.30	M4K3	Q8IVH8	MAP4K3	0.101901	0.404755	0.718302
INPP5B.12641.3	I5P2	P32019	INPP5B	0.101608	0.406115	0.719917
PF4V1.5663.18	PF4V	P10720	PF4V1	0.101608	0.406115	0.719917
HDHD2.13472.35	HDHD2	Q9H0R4	HDHD2	0.101352	0.407304	0.721119
KIAA1324L.8363.18	K132L	A8MWY0	KIAA1324L	0.101315	0.407474	0.721119
IHH.19606.28	ihh	Q14623	IHH	0.101279	0.407644	0.721119
VWA1.6385.63	VWA1	Q6PCB0	VWA1	0.101206	0.407984	0.721119
SERPINA5.3389.7	PCI	P05154	SERPINA5	0.101096	0.408494	0.721495
VIT.6234.74	VITRN	Q6UXI7	VIT	0.10095	0.409176	0.722171
TAGLN2.11636.33	Transgelin-2	P37802	TAGLN2	0.100913	0.409346	0.722209
TNMD.6578.29	TNMD	Q9H2S6	TNMD	0.10084	0.409687	0.722284
ISL1.11549.6	ISL1	P61371	ISL1	0.100585	0.410882	0.724127
ANGPT4.2500.2	Angiopoietin-4	Q9Y264	ANGPT4	0.10011	0.413106	0.726574
BCAR3.12634.79	BCAR3	O75815	BCAR3	0.1	0.41362	0.726574
IGF1.8406.17	IGF-I	P05019	IGF1	0.1	0.41362	0.726574
VCAM1.2967.8	VCAM-1	P19320	VCAM1	0.1	0.41362	0.726574
CYB5R1.18255.6	NB5R1	Q9UHQ9	CYB5R1	0.0998904	0.414135	0.726687
CD79A.15674.3	CD79A	P11912	CD79A	0.0997442	0.414822	0.727628
STAR.10085.25	STAR	P49675	STAR	0.0997077	0.414994	0.727666
ALDH3A1.11480.1	Aldehyde dehydrogenase, class 3	P30838	ALDH3A1	0.0995616	0.415681	0.728081
LYSMD4.9106.87	LYSM4	Q5XG99	LYSMD4	0.099525	0.415853	0.728119
SH3BP2.7769.29	3BP2	P78314	SH3BP2	0.0994154	0.416369	0.728759
EIF2B1.10080.9	EI2BA	Q14232	EIF2B1	0.0993423	0.416714	0.728835
TNF.5936.53	TNF-a	P01375	TNF	0.0993423	0.416714	0.728835
DCTD.17756.69	DCTD	P32321	DCTD	0.0992693	0.417058	0.728911
ARL3.12571.14	ARL3	P36405	ARL3	0.0991231	0.417748	0.729327
LPCAT2.11175.45	PCAT2	Q7L5N7	LPCAT2	0.0991231	0.417748	0.729327
GALE.11457.53	GALE	Q14376	GALE	0.098977	0.418438	0.729711
CYTH4.12746.4	CYH4	Q9UIA0	CYTH4	0.0989404	0.418611	0.729711
ARHGDIB.9846.32	Rho-GDI beta	P52566	ARHGDIB	0.0989039	0.418783	0.729711
GALK1.11448.34	GALK1	P51570	GALK1	0.0989039	0.418783	0.729711
AIFM1.9522.3	AIF	O95831	AIFM1	0.0987943	0.419302	0.729711
MAPK10.15418.25	MK10	P53779	MAPK10	0.0987578	0.419475	0.729711
RLN3.6027.31	REL3	Q8WXF3	RLN3	0.0987578	0.419475	0.729711
FOLH1.5478.50	PSMA	Q04609	FOLH1	0.0985751	0.420339	0.730467
CSDC2.12754.14	CSDC2	Q9Y534	CSDC2	0.0985385	0.420513	0.730467
MFAP3L.8837.8	MFA3L	O75121	MFAP3L	0.0985385	0.420513	0.730467
CDKN3.14178.18	CDKN3	Q16667	CDKN3	0.0984655	0.420859	0.730545
C11orf94.8383.20	CK094	C9JXX5	C11orf94	0.0984289	0.421032	0.730584
PLG.3710.49	Angiostatin	P00747	PLG	0.0983559	0.421379	0.730923
PRSS3.18864.7	TRY3	P35030	PRSS3	0.0981366	0.422419	0.73168
DEFB115.8391.12	DB115	Q30KQ5	DEFB115	0.0980636	0.422767	0.731758
IL25.4137.57	IL-17E	Q9H293	IL25	0.0978444	0.423809	0.733301
GPX7.8345.27	GPX7	Q96SL4	GPX7	0.0977347	0.424331	0.733679
LCT.9017.58	LPH	P09848	LCT	0.0972963	0.426422	0.735719
INTS3.11934.9	INT3	Q68E01	INTS3	0.0971867	0.426946	0.736098
MYDGF.9248.36	CS010	Q969H8	MYDGF	0.0971867	0.426946	0.736098
POLE3.19170.25	DPOE3	Q9NRF9	POLE3	0.0970406	0.427645	0.736779
SIGLEC15.10847.1	SIG15	Q6ZMC9	SIGLEC15	0.0969675	0.427995	0.737119
CD5L.3293.2	CD5L	O43866	CD5L	0.0969309	0.42817	0.737158
PYY.3727.35	PYY	P10082	PYY	0.0968944	0.428345	0.737197
DCUN1D5.8760.10	DCNL5	Q9BTE7	DCUN1D5	0.0968213	0.428695	0.737537
GAS7.17721.82	GAS7	O60861	GAS7	0.0967483	0.429045	0.737616
ZNF275.9609.25	ZN275	Q9NSD4	ZNF275	0.0966387	0.42957	0.738257
PNLIPRP2.15471.29	LIPR2	P54317	PNLIPRP2	0.096529	0.430096	0.738637
C22orf15.7073.69	CV015	Q8WYQ4	C22orf15	0.096456	0.430447	0.738715
DNAJC18.8033.1	DJC18	Q9H819	DNAJC18	0.096456	0.430447	0.738715
FGF2.3025.50	bFGF	P09038	FGF2	0.0964194	0.430623	0.738755
ABHD14A.5715.4	ABHEA	Q9BUJ0	ABHD14A	0.0963098	0.431149	0.739396
NBL1.2944.66	DAN	P41271	NBL1	0.0960541	0.432379	0.741244
TGFBR2.5133.17	TGF-b R II	P37173	TGFBR2	0.0960175	0.432555	0.741283
SRA1.18220.141	SRA1	Q9HD15	SRA1	0.095981	0.432731	0.741297
IL1A.4851.25	IL-1a	P01583	IL1A	0.0959079	0.433083	0.741297
ZNF23.11565.58	ZNF23	P17027	ZNF23	0.0959079	0.433083	0.741297
AFAP1L1.9889.42	AF1L1	Q8TED9	AFAP1L1	0.0957983	0.433612	0.741297
FGR.3810.50	FGR	P09769	FGR	0.0957618	0.433788	0.741297
SERF1A.7842.52	SERF1	O75920	SERF1A	0.0957252	0.433964	0.741336
PDE7A.5178.5	PDE7A	Q13946	PDE7A	0.0956887	0.43414	0.741376
MSMB.10620.21	PSP-94	P08118	MSMB	0.0955426	0.434846	0.741796
FCRL3.4440.15	FCRL3	Q96P31	FCRL3	0.0954695	0.435199	0.742137
AKT2.14685.17	PKB beta	P31751	AKT2	0.0953964	0.435552	0.742216
RALA.14332.3	RALA	P11233	RALA	0.0952503	0.436259	0.742898
PCDHGA1.6457.50	PCDG1	Q9Y5H4	PCDHGA1	0.0951407	0.436789	0.74294
WNT7A.4889.82	WNT7A	O00755	WNT7A	0.0951407	0.436789	0.74294
AK1.5012.67	Myokinase, human	P00568	AK1	0.0950311	0.43732	0.74294
MEPE.3209.69	MEPE	Q9NQ76	MEPE	0.0949945	0.437497	0.74294
JUP.16768.3	PLAK	P14923	JUP	0.094958	0.437674	0.74294
UBE2C.12556.7	UBE2C	O00762	UBE2C	0.094958	0.437674	0.74294
CHL1.8958.51	CHL1	O00533	CHL1	0.0949214	0.437852	0.74294
PTX3.6447.73	PTX3	P26022	PTX3	0.0948849	0.438029	0.74294
DOK2.14246.50	DOK2	O60496	DOK2	0.0947388	0.438738	0.74294
TPO.3873.51	TMA	P07202	TPO	0.0947388	0.438738	0.74294
DBI.16919.1	ACBP	P07108	DBI	0.094483	0.43998	0.744384
PHEX.18921.30	PHEX	P78562	PHEX	0.0944465	0.440158	0.744384
CAPNS1.18299.13	CPNS1	P04632	CAPNS1	0.0944099	0.440336	0.744384
PABPN1.8921.139	PABP2	Q86U42	PABPN1	0.0943734	0.440513	0.744384
SRXN1.14268.4	SRXN1	Q9BYN0	SRXN1	0.0943734	0.440513	0.744384
ERBB2.2616.23	ERBB2	P04626	ERBB2	0.0942273	0.441225	0.744588
CELA1.6107.3	ELA1	Q9UNI1	CELA1	0.0941907	0.441403	0.744588
EDIL3.9360.33	EDIL3	O43854	EDIL3	0.0941907	0.441403	0.744588
FXN.15389.1	FRDA	Q16595	FXN	0.0941542	0.441581	0.744629
FCN2.13717.15	FCN2	Q15485	FCN2	0.0938984	0.442827	0.745734
CCL15.18289.16	MIP-5	Q16663	CCL15	0.0938619	0.443006	0.745734
CLIC4.15314.49	CLIC4	Q9Y696	CLIC4	0.0934965	0.444791	0.74744
POLR3F.11444.49	RPC6	Q9H1D9	POLR3F	0.09346	0.44497	0.747481
ANXA4.17164.15	annexin IV	P09525	ANXA4	0.0934235	0.445148	0.747522
BAG2.19228.11	BAG-2	O95816	BAG2	0.0932408	0.446043	0.748028
HMG20B.11551.16	HM20B	Q9P0W2	HMG20B	0.0932408	0.446043	0.748028
GDF7.16756.30	GDF7	Q7Z4P5	GDF7	0.0932042	0.446222	0.748028
SYT7.7121.2	SYT7	O43581	SYT7	0.0932042	0.446222	0.748028
TNS4.9927.96	TENS4	Q8IZW8	TNS4	0.0930946	0.446759	0.74841
COL10A1.15653.9	COAA1	Q03692	COL10A1	0.092985	0.447297	0.749052
PPIE.5238.26	PPIE	Q9UNP9	PPIE	0.0926562	0.448912	0.7502
UAP1.13580.2	Sperm-associated antigen 2	Q16222	UAP1	0.0926562	0.448912	0.7502
GDF11.MSTN.2765.4	GDF-11/8	O95390 O14793	GDF11 MSTN	0.0925466	0.449451	0.750324
ISOC1.9816.37	ISOC1	Q96CN7	ISOC1	0.09251	0.449631	0.750366
MAPT.5854.60	tau	P10636	MAPT	0.0924004	0.45017	0.750749
SLIT2.18930.28	SLIT2	O94813	SLIT2	0.0923639	0.45035	0.75079
CISD2.8094.20	CISD2	Q8N5K1	CISD2	0.0922908	0.45071	0.750873
CKS1B.12530.14	CKS-1	P61024	CKS1B	0.0921812	0.45125	0.751507
C17orf78.6571.75	CQ078	Q8N4C9	C17orf78	0.0921447	0.451431	0.751507
SCGB1D2.6508.68	SG1D2	O95969	SCGB1D2	0.0921081	0.451611	0.751507
KCNF1.12834.3	KCNF1	Q9H3M0	KCNF1	0.0920716	0.451791	0.751507
CDK2.CCNA2.3357.67	CDK2/cyclin A	P24941 P20248	CDK2 CCNA2	0.0919985	0.452152	0.751507
DLD.15527.90	DLDH	P09622	DLD	0.0918159	0.453054	0.752191
DUSP3.3480.7	DUS3	P51452	DUSP3	0.0917793	0.453234	0.752233
UNC5A.7975.97	UNC5A	Q6ZN44	UNC5A	0.0917428	0.453415	0.752274
FLRT1.4547.59	FLRT1	Q9NZU1	FLRT1	0.0917062	0.453596	0.752316
PURA.12537.88	PURA	Q00577	PURA	0.0916332	0.453957	0.752658
OVCA2.17697.2	OVCA2	Q8WZ82	OVCA2	0.0913043	0.455585	0.753852
TAC1.9337.43	TKN1	P20366	TAC1	0.0913043	0.455585	0.753852
CHEK2.19328.51	Chk2	O96017	CHEK2	0.0910851	0.456673	0.755093
ADIPOQ.3554.24	Adiponectin	Q15848	ADIPOQ	0.090939	0.457398	0.756034
NEDD9.12862.14	CASL	Q14511	NEDD9	0.0908294	0.457943	0.756676
TMED10.6506.54	TMEDA	P49755	TMED10	0.0905736	0.459215	0.758261
MSTN.14583.49	Myostatin	O14793	MSTN	0.0903179	0.46049	0.759847
DYNLL2.11493.169	DYL2	Q96FJ2	DYNLL2	0.0900256	0.461948	0.761476
PCTK1.16867.76	PCTK1	Q00536	PCTK1	0.0899525	0.462313	0.761559
ZNF410.12843.6	ZN410	Q86VK4	ZNF410	0.089916	0.462496	0.761601
BIRC2.10046.55	cIAP-1	Q13490	BIRC2	0.0898064	0.463044	0.762244
FCAMR.9568.289	FCAMR	Q8WWV6	FCAMR	0.0897698	0.463227	0.762285
DEAF1.6369.82	DEAF1	O75398	DEAF1	0.0895871	0.464141	0.763054
DCUN1D3.13553.4	DCNL3	Q8IWE4	DCUN1D3	0.0895506	0.464324	0.763054
HNRNPA1.12466.7	ROA1	P09651	HNRNPA1	0.0895506	0.464324	0.763054
PRKAA1.PRKAB1.PRKAG1.5183.53	AMPK a1b1g1	Q13131 Q9Y478 P54619	PRKAA1 PRKAB1 PRKAG1	0.0895506	0.464324	0.763054
FDCSP.17346.61	FDSCP	Q8NFU4	FDCSP	0.0895141	0.464507	0.763096
CRISP3.3187.52	CRIS3	P54108	CRISP3	0.0893679	0.465239	0.763781
MYBPC1.7648.9	MYPC1	Q00872	MYBPC1	0.0893314	0.465422	0.763823
KLRF1.5098.79	KLRF1	Q9NZS2	KLRF1	0.0891852	0.466156	0.764249
FSTL4.9350.3	FSTL4	Q6MZW2	FSTL4	0.088966	0.467257	0.765536
DUSP23.17326.44	DUS23	Q9BVJ7	DUSP23	0.0888564	0.467808	0.76618
LRFN2.7200.4	LRFN2	Q9ULH4	LRFN2	0.0886372	0.468911	0.767208
XCL2.15617.8	lymphotactin beta	Q9UBD3	XCL2	0.0886007	0.469095	0.76725
TTC9B.9386.42	TTC9B	Q8N6N2	TTC9B	0.0885276	0.469463	0.767334
EFNA4.2614.28	Ephrin-A4	P52798	EFNA4	0.0884545	0.469831	0.767417
FOLR3.15495.9	FOLR3	P41439	FOLR3	0.0883814	0.4702	0.767454
SERPINA4.3449.58	Kallistatin	P29622	SERPINA4	0.0882718	0.470753	0.767454
CSNK2A2.13681.173	CSK22	P19784	CSNK2A2	0.0882353	0.470937	0.767454
DAP.19141.22	DAP1	P51397	DAP	0.0882353	0.470937	0.767454
CCDC51.12790.10	CCD51	Q96ER9	CCDC51	0.0881988	0.471121	0.767454
MOBKL1A.19177.7	MOL1A	Q7L9L4	MOBKL1A	0.0881988	0.471121	0.767454
RRM1.11360.39	RRM1	P23921	RRM1	0.0880891	0.471675	0.767881
C5orf38.6378.2	CEI	Q86SI9	C5orf38	0.087943	0.472413	0.768394
ADAM7.10753.31	ADAM7	Q9H2U9	ADAM7	0.0878699	0.472783	0.768394
ADAM15.15455.40	ADA15	Q13444	ADAM15	0.0878334	0.472968	0.768394
BTC.13088.397	BTC	P35070	BTC	0.0878334	0.472968	0.768394
HDGFL1.18898.36	HDGL1	Q5TGJ6	HDGFL1	0.0877238	0.473522	0.768522
RBM39.4284.18	RBM39	Q14498	RBM39	0.0876872	0.473707	0.768564
SMOC2.15635.4	SMOC2	Q9H3U7	SMOC2	0.08692	0.477601	0.772336
COMP.8043.153	COMP	P49747	COMP	0.0868834	0.477786	0.772336
NUDT12.13947.371	NUD12	Q9BQG2	NUDT12	0.0868834	0.477786	0.772336
CFHR1.15468.14	FHR1	Q03591	CFHR1	0.0867373	0.47853	0.772423
DIRAS1.17793.4	DIRA1	O95057	DIRAS1	0.0867373	0.47853	0.772423
EHD4.11421.10	EHD4	Q9H223	EHD4	0.0866642	0.478902	0.772423
HOPX.19196.73	HOP	Q9BPY8	HOPX	0.0866277	0.479088	0.772423
NRXN3.16323.8	NRX3A	Q9Y4C0	NRXN3	0.0866277	0.479088	0.772423
RBM3.12747.89	RBM3	P98179	RBM3	0.0866277	0.479088	0.772423
GDF3.16755.195	GDF-3	Q9NR23	GDF3	0.0865912	0.479274	0.772423
LRP1.9182.3	sLRP1	Q07954	LRP1	0.0865181	0.479647	0.772423
PARK7.19523.215	PARK7	Q99497	PARK7	0.0865181	0.479647	0.772423
PTPN13.12664.19	PTN13	Q12923	PTPN13	0.086445	0.480019	0.772423
PYCR1.18170.46	P5CR1	P32322	PYCR1	0.086445	0.480019	0.772423
CYB5D2.10924.258	NEUFC	Q8WUJ1	CYB5D2	0.0863719	0.480392	0.772423
PPIC.18819.21	PPIC	P45877	PPIC	0.0863719	0.480392	0.772423
S100A12.5852.6	S100A12	P80511	S100A12	0.0862258	0.481138	0.772896
TENM3.11107.25	TEN3	Q9P273	TENM3	0.0861893	0.481324	0.772896
PRPS2.18329.4	PRPS2	P11908	PRPS2	0.0861527	0.481511	0.772939
APBB2.12761.12	APBB2	Q92870	APBB2	0.0860796	0.481884	0.773282
SPTLC1.7886.26	SPTC1	O15269	SPTLC1	0.0860431	0.482071	0.773325
MTFR1.9095.5	MTFR1	Q15390	MTFR1	0.0856412	0.484127	0.775853
SYK.11378.37	KSYK	P43405	SYK	0.0855316	0.484689	0.775983
LILRA5.7787.25	LIRA5	A6NI73	LILRA5	0.0853124	0.485813	0.776799
APOE.2938.55	Apo E4	P02649	APOE	0.0852758	0.486	0.776799
ADAMTS3.8845.2	ATS3	O15072	ADAMTS3	0.0852028	0.486376	0.776886
CLTC.13711.10	CLH1	Q00610	CLTC	0.084947	0.48769	0.778215
HCN1.12774.12	HCN1	O60741	HCN1	0.0848739	0.488066	0.778301
ST6GALNAC1.7867.154	SIA7A	Q9NSC7	ST6GALNAC1	0.0848739	0.488066	0.778301
CRYBB2.10000.28	CRBB2	P43320	CRYBB2	0.0848009	0.488442	0.778645
ARRB1.12643.4	ARRB1	P49407	ARRB1	0.0843624	0.490701	0.780366
DNAJB6.11606.22	DNJB6	O75190	DNAJB6	0.0842894	0.491078	0.780366
MAP2K4.5242.37	MP2K4	P45985	MAP2K4	0.0842528	0.491266	0.780366
PIANP.14114.18	PIANP	Q8IYJ0	PIANP	0.0842163	0.491455	0.780366
FGF12.4392.54	FGF-12	P61328	FGF12	0.0839605	0.492776	0.781695
GDF10.6517.14	BMP-3b	P55107	GDF10	0.0838509	0.493343	0.782082
CXCL5.2979.8	ENA-78	P42830	CXCL5	0.0836317	0.494478	0.783112
MMP3.2788.55	MMP-3	P08254	MMP3	0.0835586	0.494856	0.783455
ZNF560.12543.76	ZN560	Q96MR9	ZNF560	0.0834125	0.495614	0.784186
CUL3.10045.47	CUL3	Q13618	CUL3	0.0832298	0.496562	0.784192
DEPP.7178.59	DEPP	Q9NTK1	DEPP	0.0831567	0.496941	0.784192
KRT18.5354.11	Keratin 18	P05783	KRT18	0.0828645	0.49846	0.785121
SLC26A7.13979.3	S26A7	Q8TE54	SLC26A7	0.0827914	0.49884	0.785121
ALCAM.5451.1	ALCAM	Q13740	ALCAM	0.0827183	0.499221	0.785121
NAT1.12632.14	ARY1	P18440	NAT1	0.0826452	0.499601	0.785121
TIMP4.6462.12	TIMP-4	Q99727	TIMP4	0.0826087	0.499791	0.785121
RELT.14112.40	RELT	Q969Z4	RELT	0.0825356	0.500172	0.785121
SURF1.8009.121	SURF1	Q15526	SURF1	0.0825356	0.500172	0.785121
NUDT9.9482.110	NUDT9	Q9BW91	NUDT9	0.082426	0.500743	0.785121
CD83.5065.8	CD83	Q01151	CD83	0.0823895	0.500934	0.785121
DBNL.4978.54	DBNL	Q9UJU6	DBNL	0.0822799	0.501506	0.785254
HMGB2.6913.189	HMG-2	P26583	HMGB2	0.0822799	0.501506	0.785254
RPS27A.4474.19	Ubiquitin	P62979	RPS27A	0.0822433	0.501696	0.785299
CD247.15567.2	CD3-zeta	P20963	CD247	0.0820241	0.502841	0.786462
CMA1.3423.59	Chymase	P23946	CMA1	0.0819876	0.503032	0.786462
SPINK1.8243.55	TATI	P00995	SPINK1	0.0819145	0.503414	0.786462
LRCH4.11252.30	LRCH4	O75427	LRCH4	0.081878	0.503605	0.786507
FSTL5.7099.33	FSTL5	Q8N475	FSTL5	0.0818049	0.503987	0.786596
EIF4EBP2.4184.43	4EBP2	Q13542	EIF4EBP2	0.0817318	0.504369	0.78694
FAM189A2.5719.66	CI061	Q15884	FAM189A2	0.0814761	0.505709	0.788491
METTL24.9470.15	MET24	Q5JXM2	METTL24	0.0813665	0.506283	0.788491
KIF16B.11672.17	KI16B	Q96L93	KIF16B	0.0812934	0.506666	0.788491
BTNL9.7950.142	BTNL9	Q6UXG8	BTNL9	0.0811472	0.507433	0.789178
NSF.13992.12	NSF	P46459	NSF	0.0810011	0.508201	0.7897
WWOX.17724.3	WWOX	Q9NZC7	WWOX	0.080928	0.508585	0.7897
PPIB.4718.5	PPIB	P23284	PPIB	0.0808184	0.509161	0.790088
CLCA2.8950.4	CLCA2	Q9UQC9	CLCA2	0.0802704	0.512047	0.792535
DRG1.17849.6	DRG1	Q9Y295	DRG1	0.0802704	0.512047	0.792535
NFU1.7770.25	NFU1	Q9UMS0	NFU1	0.0801973	0.512432	0.792879
CD177.13116.25	CD177	Q8N6Q3	CD177	0.0800146	0.513397	0.79361
RNF150.9774.59	RN150	Q9ULK6	RNF150	0.0800146	0.513397	0.79361
TMX3.5654.70	TMX3	Q96JJ7	TMX3	0.079905	0.513976	0.793627
COL2A1.18875.125	Chondrocalcin	P02458	COL2A1	0.0798685	0.514169	0.793627
STK17B.5249.31	DRAK2	O94768	STK17B	0.0797954	0.514555	0.793627
PPID.5202.4	PPID	Q08752	PPID	0.0797223	0.514941	0.79397
NPPB.16751.15	BNP	P16860	NPPB	0.0796858	0.515135	0.794016
RTN4R.5105.2	Nogo Receptor	Q9BZR6	RTN4R	0.0796493	0.515328	0.794061
ARF4.18408.26	ARF4	P18085	ARF4	0.0795762	0.515715	0.794151
CDHR3.8222.49	CDHR3	Q6ZTQ4	CDHR3	0.07943	0.516488	0.794469
DLK1.6496.60	DLK1	P80370	DLK1	0.079357	0.516876	0.794469
CCL28.2890.59	CCL28	Q9NRJ3	CCL28	0.0793204	0.517069	0.794469
MTHFS.14107.1	MTHFS	P49914	MTHFS	0.0792474	0.517456	0.79456
RPS7.3864.5	RS7	P62081	RPS7	0.0791377	0.518038	0.7952
TMPRSS11B.10895.28	TM11B	Q86T26	TMPRSS11B	0.0790647	0.518426	0.795543
EFNB3.7785.1	Ephrin-B3	Q15768	EFNB3	0.0790281	0.518619	0.795589
FAM69C.14341.8	FA69C	Q0P6D2	FAM69C	0.0788089	0.519784	0.79584
PVR.8064.125	Poliovirus receptor	P15151	PVR	0.0788089	0.519784	0.79584
DLK2.9359.9	EGFL9	Q6UY11	DLK2	0.0787358	0.520172	0.79584
FGF16.4393.3	FGF-16	O43320	FGF16	0.0787358	0.520172	0.79584
CHMP2B.17350.13	CHM2B	Q9UQN3	CHMP2B	0.0786628	0.520561	0.79584
PKM2.4240.31	M2-PK	P14618	PKM2	0.0786262	0.520755	0.79584
GHDC.9730.22	GHDC	Q8N2G8	GHDC	0.0782974	0.522505	0.79776
DEFB128.6360.7	DB128	Q7Z7B8	DEFB128	0.0782243	0.522895	0.797897
PNP.15435.4	PNP	P00491	PNP	0.0781878	0.52309	0.797897
VAMP4.7732.45	VAMP4	O75379	VAMP4	0.0776763	0.52582	0.801029
TWSG1.9234.8	TWSG1	Q9GZX9	TWSG1	0.0776398	0.526015	0.801029
TFF3.8323.163	TFF3	Q07654	TFF3	0.0775667	0.526406	0.801029
RGS4.17855.28	RGS4	P49798	RGS4	0.0775301	0.526601	0.801029
CD47.6653.58	CD47	Q08722	CD47	0.0774936	0.526797	0.801029
SPINK6.5731.1	ISK6	Q6UWN8	SPINK6	0.077384	0.527383	0.801418
PEBP1.4276.10	prostatic binding protein	P30086	PEBP1	0.0771282	0.528753	0.802378
BDNF.14047.78	BDNF	P23560	BDNF	0.0770917	0.528949	0.802378
FAM49B.19176.27	FA49B	Q9NUQ9	FAM49B	0.0770917	0.528949	0.802378
XCL1.4143.74	Lymphotactin	P47992	XCL1	0.0770552	0.529145	0.802378
CDKN1B.3719.2	p27Kip1	P46527	CDKN1B	0.0770186	0.529341	0.802378
IL20RA.5085.18	IL-20 Ra	Q9UHF4	IL20RA	0.0769456	0.529733	0.80247
SEC61G.8872.1	SC61G	P60059	SEC61G	0.0767994	0.530517	0.803156
C1QTNF3.7251.64	C1QT3	Q9BXJ4	C1QTNF3	0.0766533	0.531302	0.803887
ACVRL1.16318.12	ALK-1	P37023	ACVRL1	0.0766167	0.531498	0.803887
QDPR.11257.1	DHPR	P09417	QDPR	0.0766167	0.531498	0.803887
NOG.8778.3	Noggin	Q13253	NOG	0.0764341	0.53248	0.80487
C9orf89.7778.104	BINCA	Q96LW7	C9orf89	0.0762514	0.533463	0.806104
MAPRE1.12469.19	MARE1	Q15691	MAPRE1	0.0761418	0.534054	0.806241
PNLIP.15613.16	LIPP	P16233	PNLIP	0.0759591	0.535038	0.806404
JAM3.2998.53	JAM-C	Q9BX67	JAM3	0.0759225	0.535235	0.806404
GDF11.14587.16	GDF-11	O95390	GDF11	0.075886	0.535432	0.806404
STAMBP.19187.21	STABP	O95630	STAMBP	0.0758495	0.535629	0.806404
PAPL.8011.96	PAPL	Q6ZNF0	PAPL	0.0758129	0.535826	0.806404
TNFRSF11B.8304.50	OPG	O00300	TNFRSF11B	0.0758129	0.535826	0.806404
YWHAB.14156.33	14-3-3 protein beta/alpha	P31946	YWHAB	0.0755572	0.537207	0.806819
FGF18.2761.49	FGF-18	O76093	FGF18	0.0754841	0.537602	0.806819
PDCD5.12517.52	TFAR19	O14737	PDCD5	0.0754841	0.537602	0.806819
THG1L.18215.5	THG1	Q9NWX6	THG1L	0.0754841	0.537602	0.806819
LYG1.9243.10	LYG1	Q8N1E2	LYG1	0.075411	0.537997	0.807162
APOE.2418.55	Apo E	P02649	APOE	0.0753745	0.538194	0.807208
TPRKB.12417.46	TPRKB	Q9Y3C4	TPRKB	0.0751918	0.539182	0.80844
ZPLD1.5590.11	ZPLD1	Q8TCW7	ZPLD1	0.0750091	0.540171	0.809422
CYTIP.13612.7	CYTIP	O60759	CYTIP	0.0748265	0.541161	0.810153
TPI1.4309.59	Triosephosphate isomerase	P60174	TPI1	0.0748265	0.541161	0.810153
ARFGAP1.11556.19	ARFG1	Q8N6T3	ARFGAP1	0.0745707	0.542549	0.810976
SV2A.12880.1	SV2A	Q7L0J3	SV2A	0.0744976	0.542946	0.811069
OSM.14063.17	OSM	P13725	OSM	0.0742784	0.544137	0.812097
PRC1.11591.43	PRC1	O43663	PRC1	0.0742419	0.544335	0.812143
MAPK8.3825.18	MK08	P45983	MAPK8	0.0742053	0.544534	0.812189
HRG.4996.66	HRG	P04196	HRG	0.0741323	0.544931	0.812281
PIN4.12718.43	PIN4	Q9Y237	PIN4	0.0740592	0.545329	0.812374
FRRS1L.7976.19	FRS1L	Q9P0K9	FRRS1L	0.0739496	0.545925	0.812763
HAPLN4.6455.52	HPLN4	Q86UW8	HAPLN4	0.0739496	0.545925	0.812763
VSNL1.13522.20	VISL1	P62760	VSNL1	0.07384	0.546522	0.813151
EFNB2.14131.37	EFNB2	P52799	EFNB2	0.0737669	0.54692	0.813494
PSMG3.12729.12	PSMG3	Q9BT73	PSMG3	0.0736938	0.547319	0.813836
ZNF175.12716.3	ZN175	Q9Y473	ZNF175	0.0735477	0.548116	0.814521
PDIA6.5650.9	PDIA6	Q15084	PDIA6	0.0735111	0.548315	0.814567
SSMEM1.8298.8	CG045	Q8WWF3	SSMEM1	0.0734746	0.548514	0.814614
LANCL2.12628.31	LANC2	Q9NS86	LANCL2	0.0734015	0.548913	0.814753
GCKR.5223.59	GCKR	Q14397	GCKR	0.073365	0.549113	0.814753
AKT2.5360.9	PKB beta	P31751	AKT2	0.0732189	0.549911	0.815281
SCO2.16851.50	SCO2	O43819	SCO2	0.0731458	0.55031	0.815281
VPS25.18189.12	VPS25	Q9BRG1	VPS25	0.0731458	0.55031	0.815281
DSG2.9484.75	Desmoglein-2	Q14126	DSG2	0.0729266	0.551509	0.816307
LILRB3.11334.7	LIRB3	O75022	LILRB3	0.072817	0.552109	0.816696
MMP16.5268.49	MMP-16	P51512	MMP16	0.0727073	0.552709	0.817085
ARL15.18411.83	ARL15	Q9NXU5	ARL15	0.0726343	0.553109	0.817427
BAG1.17195.43	BAG-1	Q99933	BAG1	0.0725247	0.55371	0.817816
CRISP2.9282.12	CRIS2	P16562	CRISP2	0.0723054	0.554912	0.818686
CAPN2.14684.17	CAN2	P17655	CAPN2	0.0722689	0.555113	0.818686
GGT2.6334.9	GGT2	P36268	GGT2	0.0722324	0.555313	0.818686
SH3GL2.12499.108	SH3G2	Q99962	SH3GL2	0.0721593	0.555715	0.818779
PABPC3.10447.18	PABP3	Q9H361	PABPC3	0.0717939	0.557723	0.820489
S100A5.15303.63	S100A5	P33763	S100A5	0.0717939	0.557723	0.820489
GZMH.3373.5	Granzyme H	P20718	GZMH	0.0716478	0.558527	0.820566
RPRD1B.19126.4	C20orf77	Q9NQG5	RPRD1B	0.0715747	0.558929	0.820566
FAM175B.8945.7	F175B	Q15018	FAM175B	0.0715382	0.55913	0.820566
NEGR1.7050.5	NEGR1	Q7Z3B1	NEGR1	0.0709536	0.562354	0.824733
AREG.2970.60	AREG	P15514	AREG	0.070844	0.56296	0.824733
GPC6.5350.14	GPC6	Q9Y625	GPC6	0.0708075	0.563161	0.824733
BRD2.10074.128	BRD2	P25440	BRD2	0.0707709	0.563363	0.824779
C5.2851.63	C5a	P01031	C5	0.0706978	0.563767	0.824872
SUB1.19236.24	TCP4	P53999	SUB1	0.0706978	0.563767	0.824872
FGF8.2443.10	FGF-8B	P55075	FGF8	0.0706613	0.563969	0.824918
PIK3R1.8863.3	P85A	P27986	PIK3R1	0.0706248	0.564171	0.824964
VEGFC.3132.1	VEGF-C	P49767	VEGFC	0.0702959	0.565991	0.826627
SLITRK3.10565.19	SLIK3	O94933	SLITRK3	0.0701863	0.566599	0.827015
SNUPN.17765.3	SPN1	O95149	SNUPN	0.0701133	0.567004	0.827294
GCG.4891.50	Glucagon	P01275	GCG	0.0700037	0.567611	0.827294
PPIL1.9884.8	PPIL1	Q9Y3C6	PPIL1	0.0699306	0.568017	0.82734
NCL.13655.34	Nucleolin	P19338	NCL	0.069821	0.568625	0.827775
CRKL.9877.28	CRKL	P46109	CRKL	0.0697844	0.568828	0.827775
ALDH6A1.19136.22	MMSA	Q02252	ALDH6A1	0.0693825	0.571061	0.829778
CPNE1.5346.24	CPNE1	Q99829	CPNE1	0.0692729	0.571671	0.830166
LCN1.11708.2	LCN1	P31025	LCN1	0.0692729	0.571671	0.830166
AIMP1.2714.78	EMAP-2	Q12904	AIMP1	0.0691268	0.572485	0.8306
ADH5.11369.23	ADHX	P11766	ADH5	0.068798	0.574317	0.831857
TIRAP.9839.148	Tirap	P58753	TIRAP	0.0687614	0.574521	0.831857
TPK1.12018.84	TPK1	Q9H3S4	TPK1	0.0687249	0.574725	0.831857
DEF6.14090.23	DEFI6	Q9H4E7	DEF6	0.0683595	0.576765	0.833812
AMBP.15453.3	a1-Microglobulin	P02760	AMBP	0.0681768	0.577786	0.83504
BCAN.3461.58	PGCB	Q96GW7	BCAN	0.0680672	0.578399	0.835427
RTN4IP1.18180.58	RT4I1	Q8WWV3	RTN4IP1	0.0679942	0.578808	0.835519
RFK.13059.33	RIFK	Q969G6	RFK	0.067848	0.579626	0.835999
NXF1.12453.161	NXF1	Q9UBU9	NXF1	0.0676653	0.58065	0.836184
TFF3.4721.54	TFF3	Q07654	TFF3	0.0675557	0.581264	0.836369
GSR.19273.3	Glutathione reductase	P00390	GSR	0.0675192	0.581469	0.836369
MLEC.6285.71	K0152	Q14165	MLEC	0.0673	0.582699	0.837144
EPDR1.9040.144	EPDR1	Q9UM22	EPDR1	0.0671904	0.583315	0.837283
MYC.10362.35	c-Myc	P01106	MYC	0.0670442	0.584136	0.838214
G3BP2.9831.12	G3BP2	Q9UN86	G3BP2	0.0669711	0.584547	0.838554
IGSF3.9715.15	IGSF3	O75054	IGSF3	0.0668615	0.585163	0.83919
NAP1L4.19188.21	NAP2L	Q99733	NAP1L4	0.0667885	0.585574	0.839531
CBX3.18868.7	CBX3	Q13185	CBX3	0.0666058	0.586603	0.840259
IL13.3072.4	IL-13	P35225	IL13	0.0666058	0.586603	0.840259
RSPO3.8427.118	RSPO3	Q9BXY4	RSPO3	0.0665692	0.586808	0.840305
LYG2.15416.54	LYG2	Q86SG7	LYG2	0.0665327	0.587014	0.840352
RRAGC.12548.75	RRAGC	Q9HB90	RRAGC	0.0664962	0.58722	0.840398
DPP7.8346.9	DPP2	Q9UHL4	DPP7	0.06635	0.588044	0.8408
UBE2T.12400.25	UBE2T	Q9NPD8	UBE2T	0.06635	0.588044	0.8408
FIBP.19169.88	FIBP	O43427	FIBP	0.0662404	0.588662	0.8408
CALCB.17170.15	CALCB	P10092	CALCB	0.0662039	0.588868	0.8408
CXADR.11204.80	CXAR	P78310	CXADR	0.0662039	0.588868	0.8408
ECI2.12859.33	PECI	O75521	ECI2	0.0661673	0.589074	0.8408
SPOP.13727.44	SPOP	O43791	SPOP	0.0661673	0.589074	0.8408
NHP2L1.13602.6	NH2L1	P55769	NHP2L1	0.0660943	0.589486	0.8408
MTMR6.12536.46	MTMR6	Q9Y217	MTMR6	0.0660212	0.589899	0.8408
CA1.4969.2	Carbonic anhydrase I	P00915	CA1	0.0659847	0.590105	0.8408
DEFB104A.5763.67	HBD-4	Q8WTQ1	DEFB104A	0.065875	0.590724	0.841187
MED4.14021.81	MED4	Q9NPJ6	MED4	0.0655828	0.592376	0.842548
LRP2.10618.190	megalin	P98164	LRP2	0.0655097	0.59279	0.842642
LRTM1.9368.64	LRTM1	Q9HBL6	LRTM1	0.0652539	0.594237	0.843601
MAPRE2.16856.79	MARE2	Q15555	MAPRE2	0.0651809	0.594651	0.843601
CNPY4.15465.79	CNPY4	Q8N129	CNPY4	0.0651443	0.594858	0.843601
NPFF.5617.41	NPFF	O15130	NPFF	0.0651443	0.594858	0.843601
CCL13.4144.13	MCP-4	Q99616	CCL13	0.0651078	0.595065	0.843648
STATH.17172.19	STAT	P02808	STATH	0.0649982	0.595687	0.844282
HIF1AN.17199.43	HIF1N	Q9NWT6	HIF1AN	0.0644136	0.599006	0.848039
FUT3.4548.4	Fucosyltransferase 3	P21217	FUT3	0.0643771	0.599213	0.848039
RAB13.19282.3	RAB13	P51153	RAB13	0.0639386	0.601708	0.849676
CSNK2A2.CSNK2B.5226.36	CK2-A2:B	P19784 P67870	CSNK2A2 CSNK2B	0.0639021	0.601916	0.849676
HNRNPK.19333.4	hnRNP K	P61978	HNRNPK	0.0639021	0.601916	0.849676
MUSK.11547.84	MUSK	O15146	MUSK	0.0638655	0.602124	0.849676
DRGX.8034.6	DRGX	A6NNA5	DRGX	0.0636829	0.603166	0.850402
MUCL1.10975.59	MUCL1	Q96DR8	MUCL1	0.0636098	0.603582	0.850633
TBCA.12501.10	TBCA	O75347	TBCA	0.0635733	0.603791	0.850633
MAD2L1.15313.28	MD2L1	Q13257	MAD2L1	0.0635002	0.604208	0.850633
SCGB2A1.5001.6	Mammaglobin 2	O75556	SCGB2A1	0.0635002	0.604208	0.850633
CCL3.3040.59	MIP-1a	P10147	CCL3	0.063354	0.605042	0.850818
RAB1B.19278.19	RAB1B	Q9H0U4	RAB1B	0.063354	0.605042	0.850818
VAMP3.7903.18	VAMP3	Q15836	VAMP3	0.063354	0.605042	0.850818
GGA3.11683.19	GGA3	Q9NZ52	GGA3	0.0631348	0.606294	0.85159
STAT6.10372.18	STAT6	P42226	STAT6	0.0629521	0.607338	0.852546
KRT1.9931.20	Keratin-1	P04264	KRT1	0.0629156	0.607547	0.852546
MAPKAPK2.3820.68	MAPK2	P49137	MAPKAPK2	0.062806	0.608174	0.852546
L3MBTL2.12708.91	LMBL2	Q969R5	L3MBTL2	0.0627695	0.608383	0.852546
WFIKKN2.3235.50	WFKN2	Q8TEU8	WFIKKN2	0.0627695	0.608383	0.852546
CDK2AP1.9450.18	CDKA1	O14519	CDK2AP1	0.0625137	0.609848	0.853857
APBB3.13589.10	APBB3	O95704	APBB3	0.0624406	0.610266	0.85395
DLK1.6373.54	DLK1	P80370	DLK1	0.0624406	0.610266	0.85395
NR4A1.8089.173	NR4A1	P22736	NR4A1	0.0622945	0.611104	0.854382
IGFBP6.14088.38	IGFBP-6	P24592	IGFBP6	0.0621849	0.611733	0.855014
RBBP5.13631.1	RB binding protein 5	Q15291	RBBP5	0.0619291	0.613201	0.855584
CIRBP.12724.81	CIRBP	Q14011	CIRBP	0.0618926	0.613411	0.85563
SH3GL3.18318.98	SH3G3	Q99963	SH3GL3	0.0618195	0.613831	0.855835
TGM2.18934.50	Tissue transglutaminase	P21980	TGM2	0.0617464	0.61425	0.855835
FAM20B.7198.197	FA20B	O75063	FAM20B	0.0617099	0.61446	0.855835
COL15A1.8974.172	COFA1	P39059	COL15A1	0.0616368	0.61488	0.855835
PLK1.3394.81	PLK-1	P53350	PLK1	0.0615638	0.615301	0.855835
BDP1.8929.7	BDP1	A6H8Y1	BDP1	0.0614907	0.615721	0.855835
FBLN5.15585.304	fibulin 5	Q9UBX5	FBLN5	0.0614541	0.615931	0.855835
HNRNPM.12783.29	HNRPM	P52272	HNRNPM	0.0614541	0.615931	0.855835
NNMT.19376.74	NNMT	P40261	NNMT	0.0614541	0.615931	0.855835
MAP2K3.6151.18	MP2K3	P46734	MAP2K3	0.0613811	0.616352	0.855835
SH2D1A.4567.82	SH21A	O60880	SH2D1A	0.0613811	0.616352	0.855835
CFHR2.15584.9	FHR2	P36980	CFHR2	0.0613445	0.616562	0.855835
PRRG1.9008.6	TMG1	O14668	PRRG1	0.0613445	0.616562	0.855835
CPLX2.15321.8	CPLX2	Q6PUV4	CPLX2	0.0611984	0.617403	0.856501
YWHAZ.5858.6	14-3-3 protein zeta/delta	P63104	YWHAZ	0.0610157	0.618456	0.856501
DOS.9123.18	DOS	Q8N350	DOS	0.0609792	0.618667	0.856547
HNRNPDL.10852.114	HNRDL	O14979	HNRNPDL	0.0607234	0.620142	0.857854
BMP15.11129.66	BMP15	O95972	BMP15	0.0606869	0.620353	0.857901
CCL2.2578.67	MCP-1	P13500	CCL2	0.0606503	0.620563	0.857947
ARID3A.3875.62	ARI3A	Q99856	ARID3A	0.0603946	0.62204	0.8593
LRIT2.11716.28	LRIT2	A6NDA9	LRIT2	0.0603581	0.622252	0.8593
PRRG4.9579.59	TMG4	Q9BZD6	PRRG4	0.0603215	0.622463	0.859346
NR3C2.12931.16	MCR	P08235	NR3C2	0.060285	0.622674	0.859393
TXNL4B.15316.262	TXN4B	Q9NX01	TXNL4B	0.0602119	0.623096	0.859486
PRKCZ.2645.54	PKC-Z	Q05513	PRKCZ	0.0601023	0.62373	0.859626
PDE6D.13491.40	PDE6D	O43924	PDE6D	0.0599562	0.624576	0.860302
INSL6.5754.76	INSL6	Q9Y581	INSL6	0.0598831	0.624999	0.860468
VSIG1.8367.142	VSIG1	Q86XK7	VSIG1	0.0597735	0.625634	0.860468
CNTFR.14101.2	CNTFR alpha	P26992	CNTFR	0.0597004	0.626057	0.860468
SYNJ2BP.17348.5	SYJ2B	P57105	SYNJ2BP	0.0596639	0.626269	0.860468
PECAM1.2695.25	PECAM-1	P16284	PECAM1	0.0595543	0.626904	0.860468
SUDS3.10703.203	SDS3	Q9H7L9	SUDS3	0.0595177	0.627116	0.860468
CFL1.4203.50	Cofilin-1	P23528	CFL1	0.0594446	0.62754	0.860468
INSR.3448.13	IR	P06213	INSR	0.0594446	0.62754	0.860468
G3BP1.19266.35	G3BP1	Q13283	G3BP1	0.0594081	0.627751	0.860515
CDH15.5410.53	CAD15	P55291	CDH15	0.059335	0.628175	0.860609
MRPL14.8021.59	RM14	Q6P1L8	MRPL14	0.059335	0.628175	0.860609
ZNF180.12771.19	ZN180	Q9UJW8	ZNF180	0.0590427	0.629872	0.862185
TP53I11.13022.20	P5I11	O14683	TP53I11	0.0588601	0.630934	0.862185
ANGPT1.2811.27	Angiopoietin-1	Q15389	ANGPT1	0.0588235	0.631146	0.862185
B4GALT2.9595.11	B4GT2	O60909	B4GALT2	0.0588235	0.631146	0.862185
NAPG.17773.26	SNAG	Q99747	NAPG	0.0588235	0.631146	0.862185
ANKRD46.7851.30	ANR46	Q86W74	ANKRD46	0.058787	0.631358	0.862185
VNN2.15480.2	VNN2	O95498	VNN2	0.0587505	0.631571	0.862185
ICAM3.2649.77	sICAM-3	P32942	ICAM3	0.0587139	0.631783	0.862185
PSG6.6456.17	PSG6	Q00889	PSG6	0.0586774	0.631996	0.862185
RLBP1.12936.38	RLBP1	P12271	RLBP1	0.0586043	0.632421	0.862522
PODXL2.10616.67	PDXL2	Q9NZ53	PODXL2	0.0583851	0.633697	0.862804
DTYMK.19504.22	KTHY	P23919	DTYMK	0.058312	0.634123	0.862946
SIRPB2.5669.26	SIRB2	Q5JXA9	SIRPB2	0.0582755	0.634335	0.862946
FST.4132.27	FST	P19883	FST	0.0582389	0.634548	0.862993
PFKM.17384.110	K6PF	P08237	PFKM	0.0580928	0.6354	0.863418
EIF4A1.18829.4	IF4A1	P60842	EIF4A1	0.0580563	0.635613	0.863418
NPW.9986.14	Neuropeptide W	Q8N729	NPW	0.0580563	0.635613	0.863418
ARHGEF25.13519.112	ARHGP	Q86VW2	ARHGEF25	0.0580197	0.635826	0.863418
LRRC37A2.8897.3	L37A2	A6NM11	LRRC37A2	0.0579832	0.636039	0.863418
IFNB1.14127.240	IFN-b	P01574	IFNB1	0.0579467	0.636252	0.863418
ARF6.12425.104	ARF6	P62330	ARF6	0.0579101	0.636465	0.863418
COL9A1.15466.30	CO9A1	P20849	COL9A1	0.0579101	0.636465	0.863418
IMPDH1.5229.90	IMDH1	P20839	IMPDH1	0.057764	0.637318	0.863849
RNF215.9064.12	RN215	Q9Y6U7	RNF215	0.0576544	0.637958	0.864474
PDXP.3897.61	PLPP	Q96GD0	PDXP	0.0574717	0.639025	0.864805
NUP98.12772.8	NUP98	P52948	NUP98	0.0574351	0.639239	0.864805
CDC42.9840.2	Cdc42Hs	P60953	CDC42	0.0573986	0.639452	0.864805
TKT.4306.4	Transketolase	P29401	TKT	0.0573986	0.639452	0.864805
ANKRD1.15361.37	ANKR1	Q15327	ANKRD1	0.0573255	0.639879	0.865141
NANS.17802.4	SIAS	Q9NR45	NANS	0.0569602	0.642017	0.867063
TOPBP1.9947.22	TOPB1	Q92547	TOPBP1	0.0568871	0.642445	0.867204
GLTP.12513.8	GLTP	Q9NZD2	GLTP	0.0568506	0.642659	0.867204
PSG9.9335.28	PSG9	Q00887	PSG9	0.0568506	0.642659	0.867204
CUBN.12904.180	cubilin	O60494	CUBN	0.0563578	0.645547	0.86989
PMS2.11312.40	PMS2	P54278	PMS2	0.0561564	0.64673	0.870702
DLL3.9974.8	DLL3	Q9NYJ7	DLL3	0.0561198	0.646944	0.870702
CREB3L4.11308.8	CR3L4	Q8TEY5	CREB3L4	0.0560833	0.647159	0.870702
CLEC1B.4332.6	CLC1B	Q9P126	CLEC1B	0.0560468	0.647374	0.870702
IL2RA.3151.6	IL-2 sRa	P01589	IL2RA	0.0560102	0.647588	0.870702
SMNDC1.17805.35	SPF30	O75940	SMNDC1	0.0559372	0.648017	0.870796
RGMB.3331.8	RGMB	Q6NW40	RGMB	0.0559006	0.648232	0.870843
LAT.10551.7	LAT	O43561	LAT	0.0556449	0.649736	0.871896
POSTN.3457.57	Periostin	Q15063	POSTN	0.0556083	0.649951	0.871943
GOT1.4912.17	GOT1	P17174	GOT1	0.0555718	0.650166	0.871989
APEX1.9849.13	APEX1	P27695	APEX1	0.0554987	0.650596	0.872325
PPP1R14A.19117.3	PP14A	Q96A00	PPP1R14A	0.0554622	0.650811	0.872372
HPGD.4995.16	HPG-	P15428	HPGD	0.0554256	0.651026	0.872418
PCDH10.9018.38	PCD10	Q9P2E7	PCDH10	0.0553526	0.651456	0.872512
RAC1.2870.29	RAC1	P63000	RAC1	0.0551334	0.652748	0.873658
VPS29.14318.1	VPS29	Q9UBQ0	VPS29	0.0550237	0.653394	0.873658
VSIG2.8018.43	VSIG2	Q96IQ7	VSIG2	0.0550237	0.653394	0.873658
TRIO.11126.102	TRIO	O75962	TRIO	0.0549507	0.653825	0.873751
CDH12.19388.2	Cadherin-12	P55289	CDH12	0.0548045	0.654687	0.873986
ARPP19.4963.19	ARP19	P56211	ARPP19	0.054768	0.654903	0.873986
DDX6.12869.68	DDX6	P26196	DDX6	0.054768	0.654903	0.873986
FBXL4.9951.36	FBXL4	Q9UKA2	FBXL4	0.0546584	0.65555	0.874367
B4GALT7.7806.33	B4GT7	Q9UBV7	B4GALT7	0.0545122	0.656413	0.875036
IFNLR1.7192.37	CRF2-12	Q8IU57	IFNLR1	0.0543296	0.657492	0.875511
FAP.5029.3	SEPR	Q12884	FAP	0.0541103	0.658788	0.876033
SMAD2.10364.6	SMAD2	Q15796	SMAD2	0.0541103	0.658788	0.876033
EIF1AY.19224.5	IF1AY	O14602	EIF1AY	0.0539642	0.659653	0.87622
MYL12A.19373.3	MLRM	P19105	MYL12A	0.0539642	0.659653	0.87622
SAR1A.17726.3	SAR1A	Q9NR31	SAR1A	0.0539642	0.659653	0.87622
RBM23.11590.5	RBM23	Q86U06	RBM23	0.0539277	0.659869	0.876267
ACBD6.10075.75	ACBD6	Q9BR61	ACBD6	0.0535988	0.661817	0.878131
POLI.13536.56	POLI	Q9UNA4	POLI	0.0535623	0.662033	0.878178
DDR1.4122.12	discoidin domain receptor 1	Q08345	DDR1	0.0534527	0.662683	0.878799
COMT.18382.109	Catechol O-methyltransferase	P21964	COMT	0.0534161	0.6629	0.878846
RPS4X.9758.17	RS4X	P62701	RPS4X	0.0533431	0.663333	0.878885
CDSN.7085.81	CDSN	Q15517	CDSN	0.05327	0.663766	0.878885
GDI2.2647.66	Rab GDP dissociation inhibitor beta	P50395	GDI2	0.0531969	0.6642	0.878885
DOK2.19578.19	DOK2	O60496	DOK2	0.0531604	0.664417	0.878932
SCUBE1.8989.40	SCUB1	Q8IWY4	SCUBE1	0.0531239	0.664634	0.878979
TNFSF4.2839.2	OX40 Ligand	P23510	TNFSF4	0.0530142	0.665284	0.879213
KIR2DL4.5095.21	KI2L4	Q99706	KIR2DL4	0.0528316	0.66637	0.879349
SMOC1.13118.5	SMOC1	Q9H4F8	SMOC1	0.0527585	0.666804	0.879349
MEMO1.19110.6	MEMO1	Q9Y316	MEMO1	0.052722	0.667021	0.879349
PDHX.18319.7	ODPX	O00330	PDHX	0.0526854	0.667238	0.879349
BAMBI.8811.24	BAMBI	Q13145	BAMBI	0.0526489	0.667455	0.879349
GSN.4775.34	Gelsolin	P06396	GSN	0.0526489	0.667455	0.879349
ASH1L.12622.96	ASH1L	Q9NR48	ASH1L	0.0526123	0.667673	0.879396
STMN3.8019.73	STMN3	Q9NZ72	STMN3	0.0524662	0.668542	0.880203
FGF4.4123.60	FGF-4	P08620	FGF4	0.0523931	0.668977	0.880203
FREM2.7246.4	FREM2	Q5SZK8	FREM2	0.0523566	0.669194	0.880203
SUMO3.14623.26	SUMO3	P55854	SUMO3	0.0523566	0.669194	0.880203
SPTAN1.5031.10	SPTA2	Q13813	SPTAN1	0.0523201	0.669411	0.88025
SEMA6A.7945.10	Semaphorin-6A	Q9H2E6	SEMA6A	0.0519547	0.671587	0.881961
TREML2.5736.1	TRML2	Q5T2D2	TREML2	0.0519547	0.671587	0.881961
PLG.4150.75	Plasmin	P00747	PLG	0.0519182	0.671805	0.881961
TREX2.17829.2	TREX2	Q9BQ50	TREX2	0.0519182	0.671805	0.881961
CDKN2D.12376.85	p19-INK4d	P55273	CDKN2D	0.0518816	0.672023	0.882007
RDX.18373.13	Radixin	P35241	RDX	0.0516259	0.673548	0.883
TBCB.17686.27	TBCB	Q99426	TBCB	0.0515528	0.673984	0.883
TNFAIP8.12563.2	TFIP8	O95379	TNFAIP8	0.0515528	0.673984	0.883
NT5DC3.9126.171	NT5D3	Q86UY8	NT5DC3	0.0515163	0.674202	0.883
SDHAF2.6420.4	SDHF2	Q9NX18	SDHAF2	0.0514797	0.67442	0.883
LEPRE1.6273.58	P3H1	Q32P28	LEPRE1	0.0513336	0.675293	0.883043
MEF2C.8933.84	MEF2C	Q06413	MEF2C	0.051297	0.675511	0.883043
ASTL.7993.23	ASTL	Q6HA08	ASTL	0.0512605	0.675729	0.883043
FGF6.4130.71	FGF-6	P10767	FGF6	0.051224	0.675948	0.883087
BUB1.12033.3	BUB1	O43683	BUB1	0.0511874	0.676166	0.883087
MADCAM1.11258.41	MAdCAM-1	Q13477	MADCAM1	0.0510413	0.677039	0.883087
ADH6.18206.18	ADH6	P28332	ADH6	0.0509682	0.677476	0.883181
PPM1L.7187.3	PPM1L	Q5SGD2	PPM1L	0.0509682	0.677476	0.883181
NEO1.8900.28	NEO1	Q92859	NEO1	0.0509317	0.677695	0.883228
DNAJB2.11438.6	DNJB2	P25686	DNAJB2	0.0507855	0.678569	0.883654
CNEP1R1.13532.25	NEPR1	Q8N9A8	CNEP1R1	0.0505663	0.679881	0.883792
KAT2A.19369.17	GCNL2	Q92830	KAT2A	0.0504932	0.680318	0.883792
NCK2.13615.60	NCK2	O43639	NCK2	0.0504932	0.680318	0.883792
SQSTM1.15448.47	SQSTM	Q13501	SQSTM1	0.0504932	0.680318	0.883792
SMYD2.12636.113	SMYD2	Q9NRG4	SMYD2	0.0504567	0.680537	0.883792
FGF8.19570.12	FGF-8	P55075	FGF8	0.0504202	0.680756	0.883792
SSU72.13566.2	SSU72	Q9NP77	SSU72	0.0504202	0.680756	0.883792
TSN.12477.42	TSN	Q15631	TSN	0.0503836	0.680975	0.883792
SERPINB4.15444.45	SCCA2	P48594	SERPINB4	0.0502009	0.68207	0.884408
CXCL13.3487.32	BLC	O43927	CXCL13	0.0501279	0.682508	0.884739
RNF128.6510.56	RN128	Q8TEB7	RNF128	0.0500548	0.682946	0.88488
ENPP2.16892.23	ENPP2	Q13822	ENPP2	0.0499087	0.683822	0.885164
RNASE1.7211.2	RNase 1	P07998	RNASE1	0.0499087	0.683822	0.885164
NMT1.5196.7	NMT1	P30419	NMT1	0.0498356	0.684261	0.885164
JAM2.2997.8	JAM-B	P57087	JAM2	0.0497991	0.68448	0.885164
PCSK1N.9391.60	PCSK1	Q9UHG2	PCSK1N	0.0497991	0.68448	0.885164
POMGNT1.8253.2	PMGT1	Q8WZA1	POMGNT1	0.0497991	0.68448	0.885164
IL5RA.13686.2	IL-5 Ra	Q01344	IL5RA	0.0495798	0.685796	0.885589
COL8A1.4807.13	CO8A1	P27658	COL8A1	0.0494337	0.686674	0.885636
PPIH.12449.16	PPIH	O43447	PPIH	0.0490683	0.688871	0.8871
CPVL.8891.7	CPVL	Q9H3G5	CPVL	0.0490318	0.689091	0.8871
IGDCC4.9793.145	IGDC4	Q8TDY8	IGDCC4	0.0490318	0.689091	0.8871
DEFA1.19579.5	HNP-1	P59665	DEFA1	0.0489222	0.689751	0.887477
ATXN3.16825.20	ATX3	P54252	ATXN3	0.0488856	0.689971	0.887524
PPCS.17843.30	PPCS	Q9HAB8	PPCS	0.0488491	0.690191	0.887571
FGF7.4487.1	FGF7	P21781	FGF7	0.048703	0.691071	0.888231
PRKCB.5475.10	PKC-B-II	P05771	PRKCB	0.0486299	0.691511	0.888373
NUDCD3.4254.6	NUDC3	Q8IVD9	NUDCD3	0.0485934	0.691731	0.888373
VPS24.12508.9	CHMP3	Q9Y3E7	VPS24	0.0484837	0.692392	0.888514
RBM22.12980.31	RBM22	Q9NW64	RBM22	0.0484472	0.692612	0.888561
AGA.10435.2	ASPG	P20933	AGA	0.0483376	0.693273	0.888938
MSRA.7137.8	MSRA	Q9UJ68	MSRA	0.0481184	0.694595	0.889692
NAA10.17854.33	NAA10	P41227	NAA10	0.0481184	0.694595	0.889692
PRKAR1B.12479.50	KAP1	P31321	PRKAR1B	0.0480453	0.695036	0.890021
ARPP21.12860.7	cAMP-regulated phosphoprotein 21	Q9UBL0	ARPP21	0.0480088	0.695257	0.890068
RECQL.11431.235	RECQ1	P46063	RECQL	0.0479722	0.695477	0.890115
SLC27A2.9045.3	S27A2	O14975	SLC27A2	0.0478992	0.695918	0.890445
BPGM.12020.39	PMGE	P07738	BPGM	0.0476069	0.697684	0.891291
CRYBB1.17751.68	CRBB1	P53674	CRYBB1	0.0473877	0.69901	0.891668
SAP30.12888.18	SAP30	O75446	SAP30	0.0473511	0.699231	0.891668
SRGN.19251.56	Platelet proteoglycan	P10124	SRGN	0.0473511	0.699231	0.891668
ACAP2.12343.14	CENB2	Q15057	ACAP2	0.0473146	0.699452	0.891668
DOC2B.7997.118	DOC2B	Q14184	DOC2B	0.0470588	0.701	0.893217
PACSIN1.12676.1	PACN1	Q9BY11	PACSIN1	0.0469127	0.701885	0.893217
ADGRF1.11243.90	GPR110	Q5T601	ADGRF1	0.0468761	0.702106	0.893217
DARS.12675.14	SYDC	P14868	DARS	0.0468761	0.702106	0.893217
MAPK3.2855.49	ERK-1	P27361	MAPK3	0.0468761	0.702106	0.893217
RAB21.17514.48	RAB21	Q9UL25	RAB21	0.0468761	0.702106	0.893217
MANSC1.9557.5	MANS1	Q9H8J5	MANSC1	0.0466569	0.703434	0.894155
PC.13990.1	pyruvate carboxylase	P11498	PC	0.0464377	0.704764	0.89514
CCL23.2913.1	MPIF-1	P55773	CCL23	0.0462185	0.706094	0.896125
PHF3.11544.39	PHF3	Q92576	PHF3	0.0462185	0.706094	0.896125
SSRP1.5032.64	SSRP1	Q08945	SSRP1	0.0459993	0.707425	0.897579
IL31.10455.196	IL-31	Q6EBC2	IL31	0.0457435	0.708979	0.898139
CTRB1.5671.1	Chymotrypsin	P17538	CTRB1	0.0454147	0.710979	0.900201
LDLRAP1.18183.3	ARH	Q5SW96	LDLRAP1	0.0454147	0.710979	0.900201
SYTL4.11563.51	SYTL4	Q96C24	SYTL4	0.0453051	0.711646	0.90081
RSPO1.16614.27	RSPO1	Q2MKA7	RSPO1	0.045232	0.71209	0.901036
XDH.11264.33	XDH	P47989	XDH	0.0451955	0.712313	0.901036
EYS.9365.91	EYS	Q5T1H1	EYS	0.045068	0.713089	0.901036
STK17B.8399.6	DRAK2	O94768	STK17B	0.0450493	0.713203	0.901036
MANSC4.9578.263	MANS4	A6NHS7	MANSC4	0.0450128	0.713425	0.901036
FGF20.2763.66	FGF-20	Q9NP95	FGF20	0.0449763	0.713648	0.901036
FLRT2.13122.19	FLRT2	O43155	FLRT2	0.0449397	0.71387	0.901036
PRSS8.15513.108	Prostasin	Q16651	PRSS8	0.0449397	0.71387	0.901036
JAKMIP3.9068.17	JKIP3	Q5VZ66	JAKMIP3	0.0448301	0.714538	0.901171
CALN1.10933.107	CABP8	Q9BXU9	CALN1	0.044757	0.714984	0.901171
CALR.5264.65	calreticulin	P27797	CALR	0.044757	0.714984	0.901171
LRRN1.11293.14	LRRN1	Q6UXK5	LRRN1	0.0447205	0.715207	0.901171
CCT5.12569.25	TCP-1-epsilon	P48643	CCT5	0.0446474	0.715652	0.901171
NPDC1.10424.31	NPDC1	Q9NQX5	NPDC1	0.0445744	0.716098	0.901498
TSNARE1.7069.9	TSNA1	Q96NA8	TSNARE1	0.0443917	0.717212	0.902148
MREG.19145.4	MREG	Q8N565	MREG	0.0443186	0.717658	0.902148
AFM.4763.31	Afamin	P43652	AFM	0.0441725	0.718551	0.902191
TNFRSF13C.5383.14	BAFF Receptor	Q96RJ3	TNFRSF13C	0.0440994	0.718997	0.902191
IGHM.IGJ.IGK.IGL.3069.52	IgM	P01871	IGHM IGJ IGK@ IGL@	0.0440263	0.719443	0.902191
KLRC3.7795.14	NKG2E	Q07444	KLRC3	0.0440263	0.719443	0.902191
ABL1.3341.33	ABL1	P00519	ABL1	0.0439898	0.719666	0.902238
GP5.7185.29	GPV	P40197	GP5	0.0439167	0.720113	0.90233
MMAB.17783.9	MMAB	Q96EY8	MMAB	0.0436244	0.7219	0.903634
DDR2.15381.45	Discoidin domain receptor 2	Q16832	DDR2	0.0434052	0.723241	0.904652
IRAK4.18162.167	IRAK4	Q9NWZ3	IRAK4	0.043259	0.724136	0.904652
PCDHGC5.7983.1	PCDGM	Q9Y5F6	PCDHGC5	0.043259	0.724136	0.904652
TXLNA.15698.6	TXLNA	P40222	TXLNA	0.043186	0.724583	0.904652
UBXN4.9970.7	UBXN4	Q92575	UBXN4	0.043186	0.724583	0.904652
MGP.6520.87	MGP	P08493	MGP	0.0431494	0.724807	0.904652
TFF2.9191.8	Trefoil factor 2	Q03403	TFF2	0.0430398	0.725478	0.904652
TMED2.10761.5	TMED2	Q15363	TMED2	0.0430398	0.725478	0.904652
UBE2N.3905.62	UBE2N	P61088	UBE2N	0.0430398	0.725478	0.904652
EIF4G2.4230.1	IF4G2	P78344	EIF4G2	0.0430033	0.725702	0.904652
HLA.DQA2.7757.5	DQA2	P01906	HLA-DQA2	0.0430033	0.725702	0.904652
GALP.9398.30	GALP	Q9UBC7	GALP	0.0428937	0.726374	0.905024
RNF148.7742.11	RN148	Q8N7C7	RNF148	0.042711	0.727493	0.905999
ITGB5.7755.37	ITB5	P18084	ITGB5	0.0426745	0.727717	0.905999
IL15.19568.17	IL-15	P40933	IL15	0.0425283	0.728614	0.906649
HABP4.10815.2	HABP4	Q5JVS0	HABP4	0.0423822	0.729511	0.907298
THBS4.3340.53	TSP4	P35443	THBS4	0.0423091	0.729959	0.90739
REG4.11102.22	REG4	Q9BYZ8	REG4	0.0421995	0.730632	0.907994
PREP.14273.19	PPCE	P48147	PREP	0.0420533	0.73153	0.908456
SLC3A1.9000.177	SLC31	Q07837	SLC3A1	0.0420533	0.73153	0.908456
MTRF1L.11134.30	RF1ML	Q9UGC7	MTRF1L	0.0420168	0.731754	0.908456
SLC6A16.13056.18	S6A16	Q9GZN6	SLC6A16	0.0420168	0.731754	0.908456
SERPINB1.10737.96	Serpin B1	P30740	SERPINB1	0.0419072	0.732428	0.908685
CBL.12016.60	CBL	P22681	CBL	0.0418707	0.732652	0.908685
ZYX.13632.10	Zyxin	Q15942	ZYX	0.0417611	0.733326	0.909009
EGF.5509.7	EGF	P01133	EGF	0.0416514	0.734	0.909611
GPC5.4991.12	GPC5	P78333	GPC5	0.0415784	0.734449	0.909748
CSTL1.6368.9	CST1L	Q9H114	CSTL1	0.0415418	0.734674	0.909748
TST.12663.1	THTR	Q16762	TST	0.0415053	0.734899	0.909794
ECHS1.17787.1	Enoyl-CoA hydratase	P30084	ECHS1	0.0413592	0.735798	0.910442
MVD.18422.41	ERG19	P53602	MVD	0.0412495	0.736473	0.911044
IGFLR1.7244.16	TM149	Q9H665	IGFLR1	0.0411765	0.736923	0.911135
NLRP4.12794.6	NALP4	Q96MN2	NLRP4	0.0411399	0.737148	0.911181
WFDC8.7147.35	WFDC8	Q8IUA0	WFDC8	0.0411034	0.737373	0.911226
STX3.7186.111	STX3	Q13277	STX3	0.0409938	0.738048	0.911363
LYZ.4920.10	Lysozyme	P61626	LYZ	0.0408476	0.738948	0.911636
SEZ6L2.3867.49	SE6L2	Q6UXD5	SEZ6L2	0.0408111	0.739173	0.911636
CEBPA.18874.66	CEBPA	P49715	CEBPA	0.0407746	0.739399	0.911636
PPA2.18307.71	PPase 2	Q9H2U2	PPA2	0.040665	0.740074	0.912005
TPSG1.3404.51	TPSG1	Q9NRR2	TPSG1	0.0406284	0.7403	0.912051
ADAM15.9956.7	ADA15	Q13444	ADAM15	0.0405554	0.74075	0.912324
STMN1.17367.5	Stathmin	P16949	STMN1	0.0404457	0.741426	0.912324
UTS2B.6290.3	UTS2B	Q765I0	UTS2B	0.0404457	0.741426	0.912324
IL18RAP.2993.1	IL-18 Rb	O95256	IL18RAP	0.0404092	0.741652	0.912324
TRIB2.12363.70	TRIB2	Q92519	TRIB2	0.0404092	0.741652	0.912324
EPHA7.15580.2	EPHA7	Q15375	EPHA7	0.04019	0.743005	0.912829
ICOSLG.5061.27	B7-H2	O75144	ICOSLG	0.0400438	0.743907	0.912917
SKIL.14670.1	SKIL	P12757	SKIL	0.0400438	0.743907	0.912917
USP8.13450.49	UBP8	P40818	USP8	0.0400073	0.744133	0.912917
CCL4L1.2781.63	LAG-1	Q8NHW4	CCL4L1	0.0399342	0.744584	0.912917
MINOS1.7956.11	MOS1	Q5TGZ0	MINOS1	0.0399342	0.744584	0.912917
SMAD3.10363.13	SMAD3	P84022	SMAD3	0.0399342	0.744584	0.912917
SLIT1.15634.139	SLIT1	O75093	SLIT1	0.0398612	0.745036	0.913008
SNAPIN.6975.52	SNAPN	O95295	SNAPIN	0.0397881	0.745487	0.91333
RNASEH1.8470.213	RNase H1	O60930	RNASEH1	0.0396054	0.746617	0.913789
UNC45A.13082.9	UN45A	Q9H3U1	UNC45A	0.0395323	0.747068	0.913832
ARAF.12583.77	ARAF	P10398	ARAF	0.0394593	0.74752	0.913832
DCLK1.17156.72	DCAK1	O15075	DCLK1	0.0393862	0.747972	0.913832
SEZ6L.19563.3	SEZ6L	Q9BYH1	SEZ6L	0.0392766	0.748651	0.914291
MYOM2.13534.20	MYOM2	P54296	MYOM2	0.03924	0.748877	0.914291
SNRPD3.17774.38	SMD3	P62318	SNRPD3	0.0392035	0.749103	0.914291
HS3ST3A1.8268.98	HS3SA	Q9Y663	HS3ST3A1	0.0390939	0.749781	0.914427
UNC5C.5139.32	UNC5H3	O95185	UNC5C	0.0390939	0.749781	0.914427
PLEK.7875.86	PLEK	P08567	PLEK	0.0390574	0.750008	0.914473
AFP.5792.8	AFP	P02771	AFP	0.0387651	0.751818	0.915758
WFIKKN1.3191.50	WFKN1	Q96NZ8	WFIKKN1	0.0387651	0.751818	0.915758
NGFR.8374.5	NGF R	P08138	NGFR	0.0383632	0.75431	0.916993
DNAJC27.12799.65	DJC27	Q9NZQ0	DNAJC27	0.0382536	0.75499	0.917084
GRB10.11358.15	GRB10	Q13322	GRB10	0.0381805	0.755443	0.917126
IK.7207.4	RED	Q13123	IK	0.0381805	0.755443	0.917126
NMS.9503.1	NMS	Q5H8A3	NMS	0.0381074	0.755896	0.917126
DLX4.11910.27	DLX4	Q92988	DLX4	0.0380343	0.75635	0.917126
VIP.3522.57	Vasoactive Intestinal Peptide	P01282	VIP	0.0379613	0.756804	0.917217
FKBP3.18383.9	FKBP3	Q00688	FKBP3	0.0379247	0.75703	0.917263
PSIP1.17176.13	PSIP1	O75475	PSIP1	0.0378151	0.757711	0.917674
HSD17B1.4708.3	17-beta-HSD 1	P14061	HSD17B1	0.0377786	0.757938	0.917674
WWP1.11307.33	WWP1	Q9H0M0	WWP1	0.0377786	0.757938	0.917674
ST6GALNAC3.10705.14	SIA7C	Q8NDV1	ST6GALNAC3	0.0377421	0.758165	0.917719
IGFBP2.8469.41	IGFBP-2	P18065	IGFBP2	0.0373402	0.760663	0.919589
LCORL.4304.18	transcription factor MLR1, isoform CRA_b	Q8N3X6	LCORL	0.0372492	0.761229	0.919589
IL22.2778.10	IL-22	Q9GZX6	IL22	0.0371575	0.761799	0.919819
TEAD4.12516.13	TEAD4	Q15561	TEAD4	0.0370844	0.762254	0.920138
EPHA5.3806.55	EphA5	P54756	EPHA5	0.0370113	0.762708	0.920458
CNTN2.3296.92	CNTN2	Q02246	CNTN2	0.0366825	0.764756	0.922009
[truncated: 2,844 more rows]
